# Supplementary material for: Alkoxycarbonylation of α,β-unsaturated amides catalyzed by palladium(ii) complexes: a DFT study of the mechanism
Source: Royal Society of Chemistry journal article supplement (doi:10.1039/c5ra26600a), 2016-01-01
Supplement: c5ra26600a1.pdf [file c5ra26600a1.pdf]

## Supporting information for

### Alkoxyacylation of $\alpha,\beta$ -Unsaturated Amides Catalyzed by Palladium (II) Complexes: A DFT Study of the Mechanism

Rami Suleiman<sup>a,\*</sup>, Victor Polo<sup>b,c</sup>, Bassam El Ali<sup>d</sup>

<sup>a</sup> Center of Research Excellence in Corrosion, King Fahd University of Petroleum & Minerals (KFUPM), Dhahran 31261, Saudi Arabia

<sup>b</sup> Departamento de Química Física Universidad de Zaragoza e Instituto de Biocomputación y Física de Sistemas Complejos (BIFI), 50009 Zaragoza, Spain

<sup>c</sup> CSIC, Instituto de Química Física Rocasolano, 28006 Madrid, Spain

<sup>d</sup> Chemistry Department, King Fahd University of Petroleum & Minerals (KFUPM), Dhahran 31261, Saudi Arabia

### List of Contents

| Content                                                                                                                                                                                                                                  | Page |
|------------------------------------------------------------------------------------------------------------------------------------------------------------------------------------------------------------------------------------------|------|
| <b>S1.</b> Cartesian coordinates (in Å) of all the B3LYP-D3-PCM/Def2-SVP optimized structures of reactants, intermediates, transition states and products in the hydride cycle in Methanol phase                                         | 2    |
| <b>Table S1.</b> DFT/B3LYP-D3-PCM/Def2-TZVP computed total electronic energies ( $E_{\text{tot}}$ , au), zero-point energies (ZPE, kcal/mol) and Gibbs free energies ( $G_{\text{tot}}$ , 383.15K, au) in methanol for the hydride cycle | 41   |
| <b>S2.</b> Cartesian coordinates (in Å) of all the B3LYP-D3-PCM/Def2-SVP optimized structures of reactants, intermediates and products in the alkoxy cycle in Methanol phase                                                             | 42   |
| <b>Table S2.</b> DFT/B3LYP-D3-PCM/Def2-TZVP computed total electronic energies ( $E_{\text{tot}}$ , au), zero-point energies (ZPE, kcal/mol) and Gibbs free energies ( $G_{\text{tot}}$ , 383.15K, au) in methanol for the alkoxy cycle  | 79   |

S1. Cartesian coordinates (in Å) of all the B3LYP/ Def2-SVP optimized structures of reactants, intermediates, transition states and products in the hydride cycle in Methanol phase.

**$\alpha,\beta$ -Unsaturated Amide**

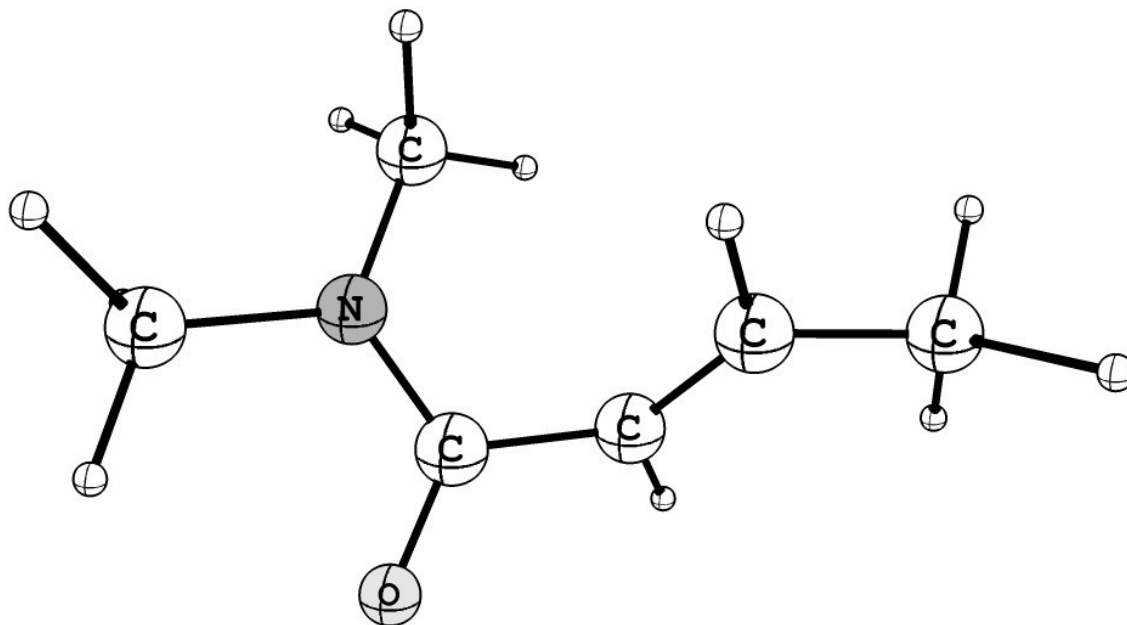

|   |              |              |              |
|---|--------------|--------------|--------------|
| C | -3.320807000 | -0.233302000 | 0.176325000  |
| C | -1.830388000 | -0.215575000 | 0.300770000  |
| H | -3.675072000 | -1.235524000 | -0.120827000 |
| H | -3.797263000 | -0.013319000 | 1.147351000  |
| H | -3.679722000 | 0.498523000  | -0.562566000 |
| C | -1.011746000 | 0.604301000  | -0.374406000 |
| H | -1.399962000 | -0.924527000 | 1.018049000  |
| H | -1.427928000 | 1.359732000  | -1.049836000 |
| C | 0.455715000  | 0.761942000  | -0.139217000 |
| O | 0.912167000  | 1.903512000  | -0.037869000 |
| N | 1.241673000  | -0.349963000 | -0.006541000 |
| C | 2.629132000  | -0.185937000 | 0.391899000  |
| H | 2.873884000  | -0.892538000 | 1.201987000  |
| H | 3.312202000  | -0.385049000 | -0.453150000 |
| H | 2.784775000  | 0.841013000  | 0.738285000  |
| C | 0.861678000  | -1.702997000 | -0.376469000 |
| H | 1.648144000  | -2.139527000 | -1.014461000 |
| H | 0.747558000  | -2.352365000 | 0.509130000  |
| H | -0.077171000 | -1.705381000 | -0.938630000 |

PPh<sub>3</sub>

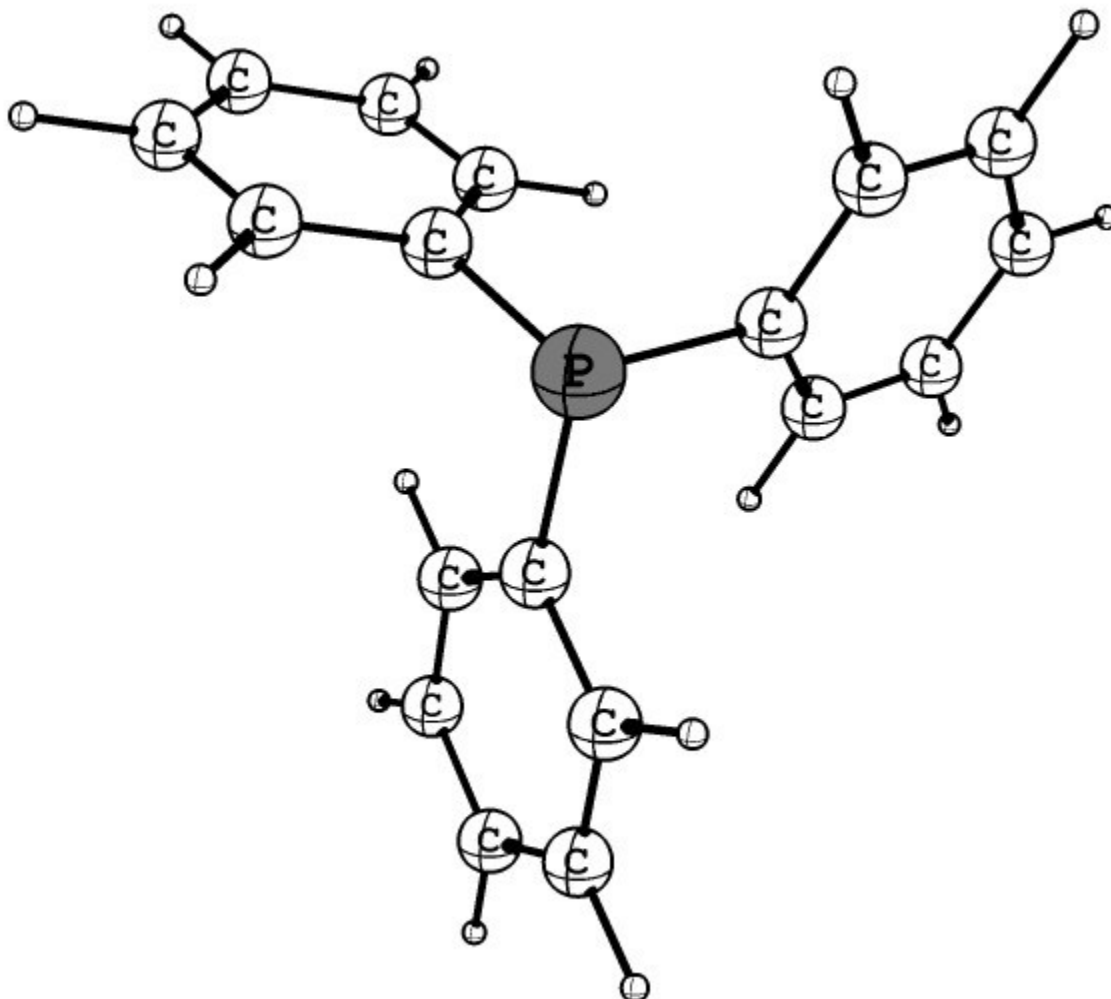

|   |              |              |              |
|---|--------------|--------------|--------------|
| P | 0.000504000  | -0.000348000 | -1.270333000 |
| C | 1.583953000  | -0.473781000 | -0.443792000 |
| C | 2.301620000  | -1.548323000 | -0.998282000 |
| C | 2.101922000  | 0.174110000  | 0.688686000  |
| C | 3.499101000  | -1.978593000 | -0.422520000 |
| H | 1.915702000  | -2.054418000 | -1.887873000 |
| C | 3.307195000  | -0.249211000 | 1.257975000  |
| H | 1.560049000  | 1.011168000  | 1.132275000  |
| C | 4.006479000  | -1.327313000 | 0.707278000  |
| H | 4.042483000  | -2.818885000 | -0.861572000 |
| H | 3.699094000  | 0.264529000  | 2.139366000  |
| H | 4.947131000  | -1.657416000 | 1.154491000  |
| C | -1.201623000 | -1.135155000 | -0.445039000 |

|   |              |              |              |
|---|--------------|--------------|--------------|
| C | -2.492793000 | -1.213801000 | -0.996279000 |
| C | -0.898539000 | -1.912975000 | 0.683447000  |
| C | -3.464937000 | -2.035105000 | -0.421074000 |
| H | -2.739134000 | -0.622500000 | -1.882937000 |
| C | -1.868575000 | -2.744695000 | 1.252067000  |
| H | 0.098665000  | -1.866507000 | 1.124479000  |
| C | -3.153642000 | -2.805546000 | 0.704806000  |
| H | -4.465746000 | -2.080787000 | -0.857468000 |
| H | -1.618850000 | -3.344990000 | 2.130513000  |
| H | -3.910469000 | -3.454642000 | 1.151680000  |
| C | -0.381421000 | 1.607874000  | -0.444713000 |
| C | -1.215585000 | 1.735807000  | 0.676944000  |
| C | 0.204338000  | 2.764152000  | -0.989933000 |
| C | -1.452215000 | 2.992080000  | 1.244420000  |
| H | -1.679977000 | 0.849997000  | 1.113651000  |
| C | -0.021921000 | 4.016804000  | -0.415509000 |
| H | 0.846838000  | 2.680745000  | -1.871237000 |
| C | -0.854269000 | 4.134042000  | 0.703232000  |
| H | -2.104278000 | 3.077147000  | 2.117317000  |
| H | 0.445470000  | 4.905296000  | -0.847095000 |
| H | -1.039077000 | 5.114249000  | 1.149131000  |

**CH<sub>3</sub>OH**

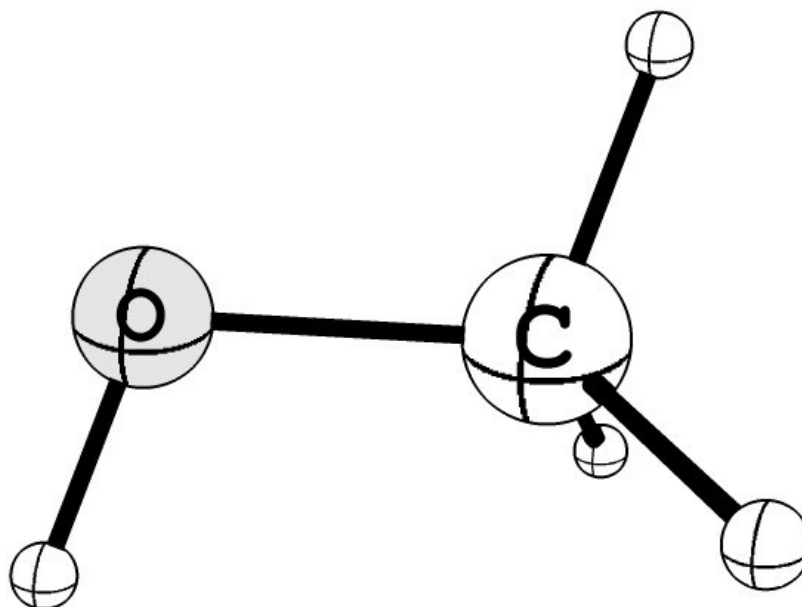

|   |              |             |              |
|---|--------------|-------------|--------------|
| C | 0.047202000  | 0.655651000 | 0.000000000  |
| H | -0.441934000 | 1.087689000 | 0.895002000  |
| H | -0.441934000 | 1.087689000 | -0.895002000 |

|   |              |              |             |
|---|--------------|--------------|-------------|
| H | 1.096002000  | 0.991787000  | 0.000000000 |
| O | 0.047202000  | -0.756148000 | 0.000000000 |
| H | -0.872967000 | -1.051884000 | 0.000000000 |

CO

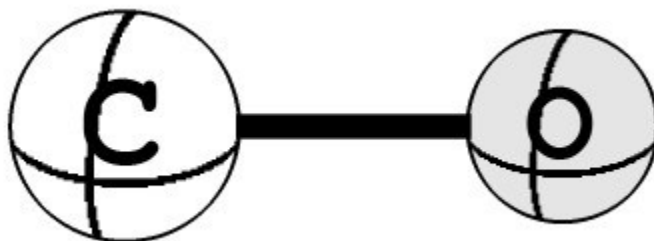

|   |             |             |              |
|---|-------------|-------------|--------------|
| C | 0.000000000 | 0.000000000 | -0.645784000 |
| O | 0.000000000 | 0.000000000 | 0.484338000  |

1H

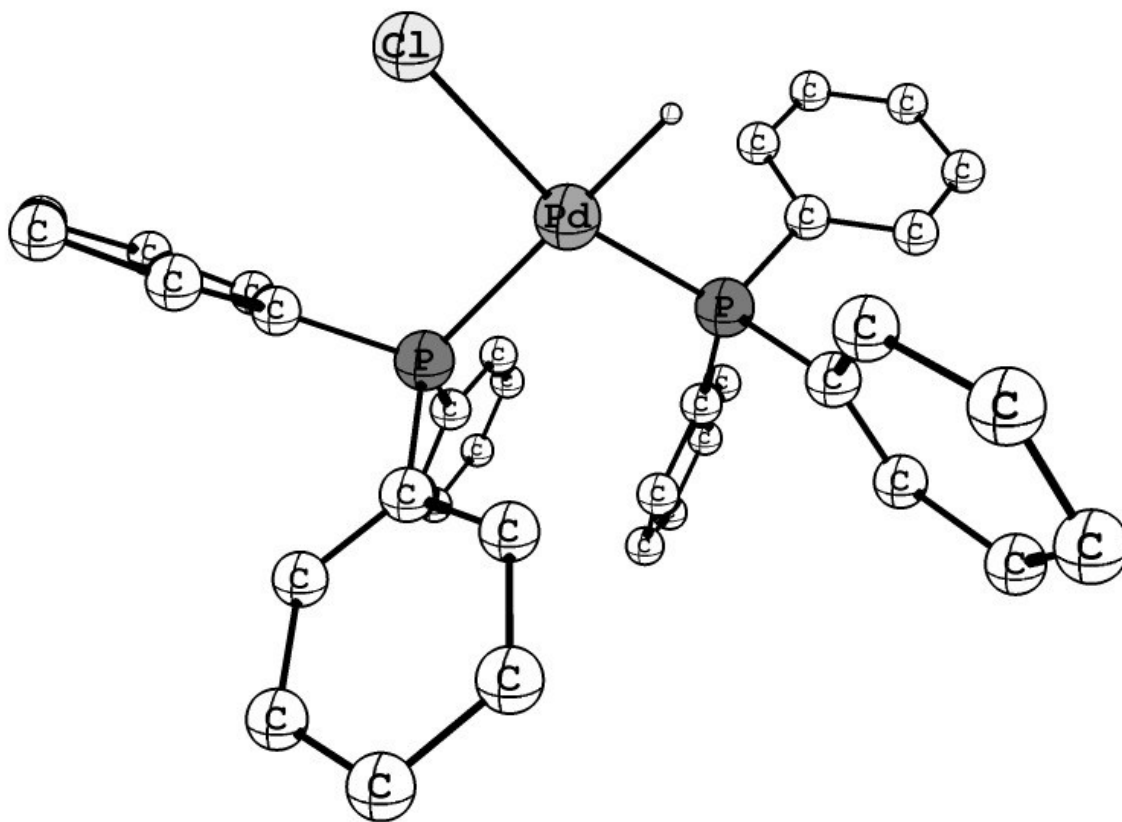

|    |              |              |              |
|----|--------------|--------------|--------------|
| Pd | 0.059045000  | 0.472659000  | -1.568695000 |
| H  | 1.243414000  | 0.894133000  | -2.497742000 |
| P  | -1.816431000 | -0.037040000 | -0.099404000 |
| P  | 1.893627000  | 0.096207000  | -0.278911000 |
| Cl | -1.389310000 | 1.107150000  | -3.369447000 |
| C  | -2.087651000 | 1.306373000  | 1.125331000  |
| C  | -3.299071000 | 1.454336000  | 1.823429000  |
| C  | -1.049844000 | 2.222136000  | 1.362152000  |
| C  | -3.451335000 | 2.475764000  | 2.763287000  |
| H  | -4.133174000 | 0.780163000  | 1.621484000  |
| C  | -1.202844000 | 3.243716000  | 2.303627000  |
| H  | -0.119713000 | 2.148248000  | 0.798698000  |
| C  | -2.401891000 | 3.368362000  | 3.010198000  |
| H  | -4.395987000 | 2.578492000  | 3.302213000  |
| H  | -0.383666000 | 3.945742000  | 2.475010000  |
| H  | -2.525268000 | 4.167580000  | 3.744713000  |
| C  | -3.460489000 | -0.185312000 | -0.904915000 |
| C  | -4.056255000 | -1.435852000 | -1.124381000 |
| C  | -4.103308000 | 0.972486000  | -1.374878000 |
| C  | -5.281077000 | -1.526374000 | -1.793786000 |
| H  | -3.569032000 | -2.344652000 | -0.767837000 |
| C  | -5.330056000 | 0.879810000  | -2.032942000 |
| H  | -3.646928000 | 1.950928000  | -1.217988000 |
| C  | -5.922089000 | -0.370325000 | -2.246321000 |
| H  | -5.737165000 | -2.506140000 | -1.954616000 |
| H  | -5.824794000 | 1.787962000  | -2.385465000 |
| H  | -6.881881000 | -0.441411000 | -2.763450000 |
| C  | -1.707748000 | -1.601232000 | 0.852646000  |
| C  | -0.927154000 | -2.632477000 | 0.309011000  |
| C  | -2.399445000 | -1.820937000 | 2.052670000  |
| C  | -0.841436000 | -3.867146000 | 0.955173000  |
| H  | -0.371764000 | -2.457769000 | -0.615651000 |
| C  | -2.310569000 | -3.055288000 | 2.698150000  |
| H  | -3.000743000 | -1.027295000 | 2.496565000  |
| C  | -1.532539000 | -4.080137000 | 2.150794000  |
| H  | -0.220093000 | -4.658681000 | 0.531310000  |
| H  | -2.846499000 | -3.215068000 | 3.636633000  |
| H  | -1.456369000 | -5.042308000 | 2.662457000  |
| C  | 1.791694000  | -1.040661000 | 1.157169000  |
| C  | 2.469612000  | -2.268214000 | 1.166472000  |
| C  | 0.985257000  | -0.693752000 | 2.253338000  |
| C  | 2.343793000  | -3.132735000 | 2.257294000  |
| H  | 3.095539000  | -2.557063000 | 0.322110000  |
| C  | 0.865513000  | -1.556407000 | 3.341050000  |
| H  | 0.444645000  | 0.253291000  | 2.261011000  |
| C  | 1.542148000  | -2.780306000 | 3.344482000  |

|   |             |              |              |
|---|-------------|--------------|--------------|
| H | 2.872567000 | -4.088505000 | 2.251576000  |
| H | 0.227869000 | -1.278240000 | 4.182368000  |
| H | 1.436815000 | -3.460797000 | 4.192242000  |
| C | 3.299601000 | -0.599169000 | -1.230151000 |
| C | 4.630076000 | -0.339876000 | -0.871167000 |
| C | 3.026570000 | -1.461884000 | -2.302662000 |
| C | 5.675603000 | -0.935547000 | -1.582018000 |
| H | 4.854651000 | 0.328931000  | -0.038647000 |
| C | 4.073339000 | -2.066178000 | -3.002500000 |
| H | 1.989883000 | -1.654998000 | -2.589576000 |
| C | 5.399611000 | -1.801029000 | -2.645153000 |
| H | 6.709955000 | -0.721983000 | -1.302958000 |
| H | 3.852639000 | -2.739474000 | -3.833876000 |
| H | 6.218658000 | -2.266168000 | -3.198563000 |
| C | 2.523483000 | 1.660535000  | 0.447119000  |
| C | 2.314687000 | 2.863623000  | -0.247765000 |
| C | 3.207277000 | 1.685041000  | 1.673469000  |
| C | 2.780173000 | 4.070807000  | 0.276944000  |
| H | 1.772327000 | 2.850733000  | -1.195217000 |
| C | 3.670626000 | 2.895407000  | 2.195894000  |
| H | 3.373544000 | 0.760310000  | 2.227413000  |
| C | 3.456597000 | 4.089597000  | 1.501176000  |
| H | 2.606881000 | 5.000635000  | -0.269332000 |
| H | 4.198970000 | 2.903781000  | 3.151899000  |
| H | 3.813806000 | 5.035323000  | 1.915112000  |

## 2H

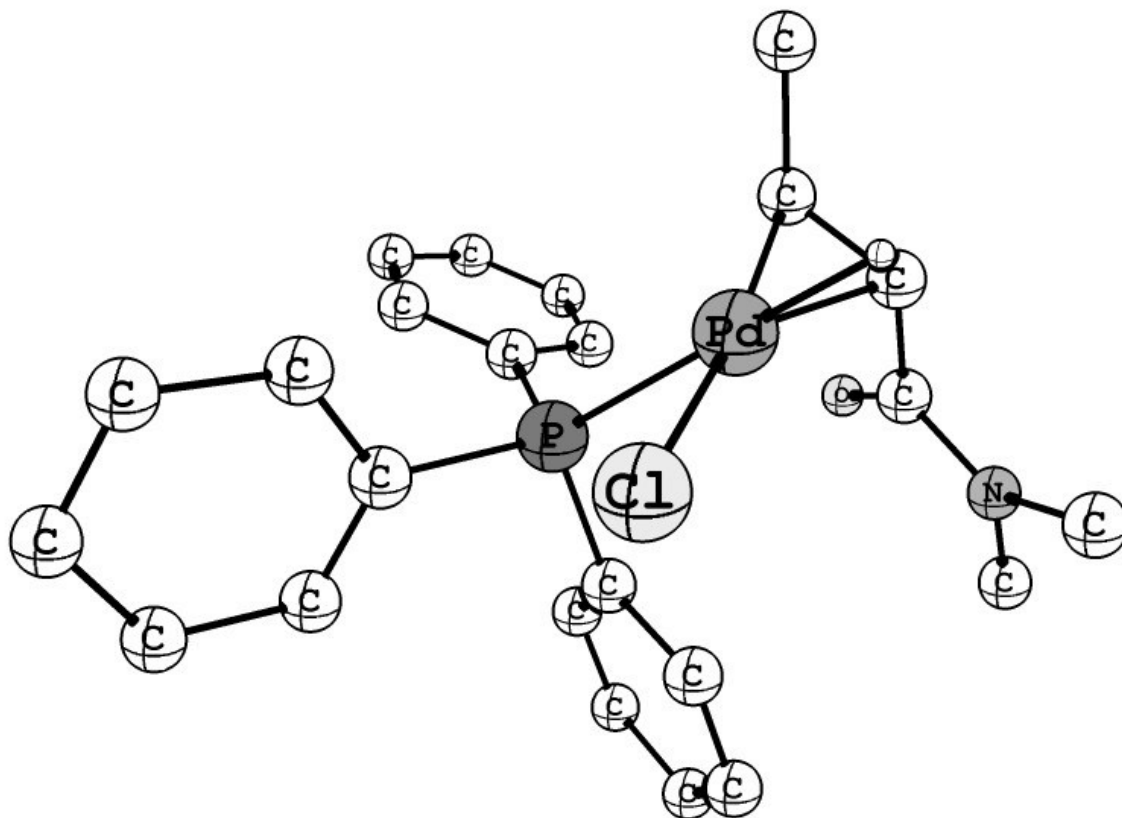

|    |              |              |              |
|----|--------------|--------------|--------------|
| Pd | -0.794429000 | -1.271805000 | -1.158238000 |
| H  | -1.730843000 | -2.265941000 | -1.888925000 |
| Cl | 0.043661000  | -3.250849000 | -0.156370000 |
| P  | 0.797581000  | 0.144565000  | 0.093707000  |
| C  | -1.449452000 | 0.421784000  | -2.449454000 |
| C  | -2.510665000 | -0.008735000 | -1.677136000 |
| C  | -1.255567000 | 0.062527000  | -3.887832000 |
| H  | -1.838750000 | -0.811264000 | -4.174171000 |
| H  | -1.564620000 | 0.908804000  | -4.510234000 |
| H  | -0.203974000 | -0.126595000 | -4.107292000 |
| C  | -2.915124000 | 0.733587000  | -0.434164000 |
| O  | -2.539622000 | 1.896425000  | -0.259404000 |
| N  | -3.731226000 | 0.101909000  | 0.437506000  |
| C  | -4.099057000 | -1.303356000 | 0.379674000  |
| H  | -3.506414000 | -1.836227000 | -0.354269000 |
| H  | -3.910906000 | -1.759086000 | 1.353737000  |
| H  | -5.160281000 | -1.415437000 | 0.145448000  |
| C  | -4.241806000 | 0.824962000  | 1.591191000  |
| H  | -3.707485000 | 0.529613000  | 2.497044000  |
| H  | -4.113867000 | 1.890622000  | 1.437037000  |
| H  | -5.300394000 | 0.594009000  | 1.717670000  |
| H  | -3.253752000 | -0.655246000 | -2.122178000 |



|   |              |              |              |
|---|--------------|--------------|--------------|
| H | -0.898869000 | 1.283523000  | -2.098963000 |
| C | 1.370459000  | 1.754538000  | -0.559704000 |
| C | 2.669625000  | 1.928440000  | -1.041240000 |
| C | 0.472648000  | 2.825494000  | -0.630920000 |
| C | 3.063499000  | 3.147396000  | -1.582285000 |
| H | 3.382274000  | 1.118517000  | -0.990689000 |
| C | 0.872905000  | 4.042533000  | -1.165946000 |
| H | -0.540014000 | 2.704388000  | -0.272732000 |
| C | 2.168382000  | 4.208123000  | -1.645457000 |
| H | 4.075032000  | 3.266105000  | -1.948573000 |
| H | 0.168420000  | 4.863224000  | -1.209334000 |
| H | 2.477588000  | 5.157498000  | -2.062942000 |
| C | 2.355250000  | -0.747394000 | 0.406413000  |
| C | 2.990956000  | -0.731106000 | 1.646235000  |
| C | 2.933248000  | -1.454954000 | -0.649954000 |
| C | 4.192786000  | -1.407847000 | 1.825425000  |
| H | 2.549517000  | -0.196006000 | 2.475417000  |
| C | 4.139535000  | -2.117735000 | -0.474244000 |
| H | 2.431929000  | -1.492559000 | -1.608420000 |
| C | 4.770897000  | -2.097424000 | 0.766006000  |
| H | 4.676409000  | -1.394140000 | 2.793557000  |
| H | 4.580887000  | -2.659942000 | -1.300309000 |
| H | 5.706361000  | -2.623157000 | 0.906615000  |
| C | 0.129866000  | 0.513159000  | 1.748475000  |
| C | -0.727138000 | -0.427448000 | 2.326307000  |
| C | 0.455927000  | 1.667666000  | 2.461286000  |
| C | -1.245061000 | -0.217407000 | 3.597027000  |
| H | -0.982009000 | -1.326074000 | 1.780756000  |
| C | -0.072740000 | 1.880420000  | 3.728864000  |
| H | 1.118677000  | 2.403418000  | 2.028048000  |
| C | -0.923192000 | 0.939522000  | 4.299033000  |
| H | -1.906250000 | -0.953559000 | 4.035274000  |
| H | 0.182403000  | 2.781335000  | 4.271548000  |
| H | -1.334797000 | 1.107948000  | 5.285618000  |

TSH23-a

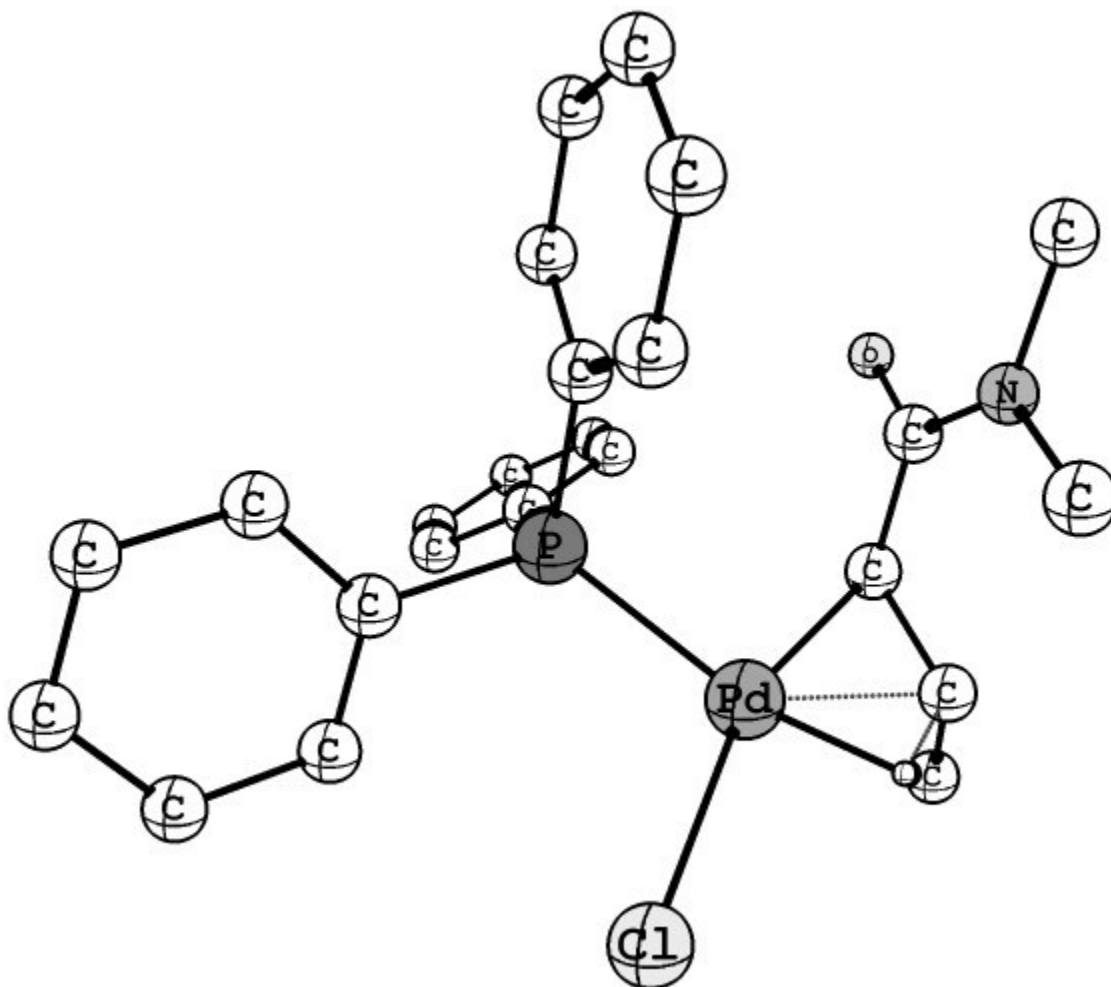

|    |              |              |              |
|----|--------------|--------------|--------------|
| Pd | -0.659771000 | -1.636462000 | -0.054740000 |
| Cl | 0.498919000  | -3.234858000 | -1.415335000 |
| C  | -2.644795000 | -2.061869000 | 0.983664000  |
| C  | -2.246023000 | -0.731040000 | 1.137127000  |
| C  | -2.884562000 | 0.520028000  | 0.600362000  |
| O  | -2.804551000 | 1.529517000  | 1.311750000  |
| N  | -3.531069000 | 0.552045000  | -0.599725000 |
| C  | -3.560102000 | -0.504620000 | -1.595059000 |
| H  | -3.529345000 | -0.046152000 | -2.594478000 |
| H  | -2.680976000 | -1.154193000 | -1.518354000 |
| H  | -4.475971000 | -1.117254000 | -1.530770000 |
| C  | -4.240694000 | 1.765096000  | -0.977433000 |
| H  | -3.728609000 | 2.268802000  | -1.814412000 |
| H  | -5.266214000 | 1.515288000  | -1.294193000 |
| H  | -4.273880000 | 2.445169000  | -0.121135000 |
| H  | -1.780613000 | -0.491077000 | 2.096450000  |
| H  | -3.575185000 | -2.238719000 | 0.426138000  |

|   |              |              |              |
|---|--------------|--------------|--------------|
| P | 0.862215000  | 0.150556000  | 0.026266000  |
| H | -1.912456000 | -2.547662000 | -0.100300000 |
| C | -2.463846000 | -3.038294000 | 2.131630000  |
| C | 1.272016000  | 0.753463000  | 1.712943000  |
| C | 0.258958000  | 1.320182000  | 2.509389000  |
| C | 2.563840000  | 0.612381000  | 2.243218000  |
| C | 0.545142000  | 1.739765000  | 3.809928000  |
| H | -0.751988000 | 1.455257000  | 2.117915000  |
| C | 2.839708000  | 1.026895000  | 3.550051000  |
| H | 3.362575000  | 0.181108000  | 1.639112000  |
| C | 1.833032000  | 1.591571000  | 4.336601000  |
| H | -0.246996000 | 2.186152000  | 4.415870000  |
| H | 3.849714000  | 0.910347000  | 3.949822000  |
| H | 2.050582000  | 1.918115000  | 5.356188000  |
| C | 2.497177000  | -0.083683000 | -0.763140000 |
| C | 3.109105000  | 0.937915000  | -1.505571000 |
| C | 3.168635000  | -1.302765000 | -0.575830000 |
| C | 4.381374000  | 0.742989000  | -2.049595000 |
| H | 2.594077000  | 1.887677000  | -1.658555000 |
| C | 4.444662000  | -1.488800000 | -1.112372000 |
| H | 2.684546000  | -2.107343000 | -0.021730000 |
| C | 5.051849000  | -0.468061000 | -1.851172000 |
| H | 4.850615000  | 1.541813000  | -2.628502000 |
| H | 4.962917000  | -2.438415000 | -0.960377000 |
| H | 6.047178000  | -0.618162000 | -2.275994000 |
| C | 0.136422000  | 1.586223000  | -0.849615000 |
| C | -0.548512000 | 1.330290000  | -2.049228000 |
| C | 0.257256000  | 2.906088000  | -0.393204000 |
| C | -1.098457000 | 2.380832000  | -2.784630000 |
| H | -0.647573000 | 0.303144000  | -2.407529000 |
| C | -0.305012000 | 3.955580000  | -1.126142000 |
| H | 0.789606000  | 3.118807000  | 0.534731000  |
| C | -0.981722000 | 3.696054000  | -2.321126000 |
| H | -1.626623000 | 2.171635000  | -3.717504000 |
| H | -0.210843000 | 4.980767000  | -0.760976000 |
| H | -1.421324000 | 4.517880000  | -2.890873000 |
| H | -1.513869000 | -2.866151000 | 2.657327000  |
| H | -3.288691000 | -2.905235000 | 2.849821000  |
| H | -2.484841000 | -4.077892000 | 1.776379000  |

TSH23-b

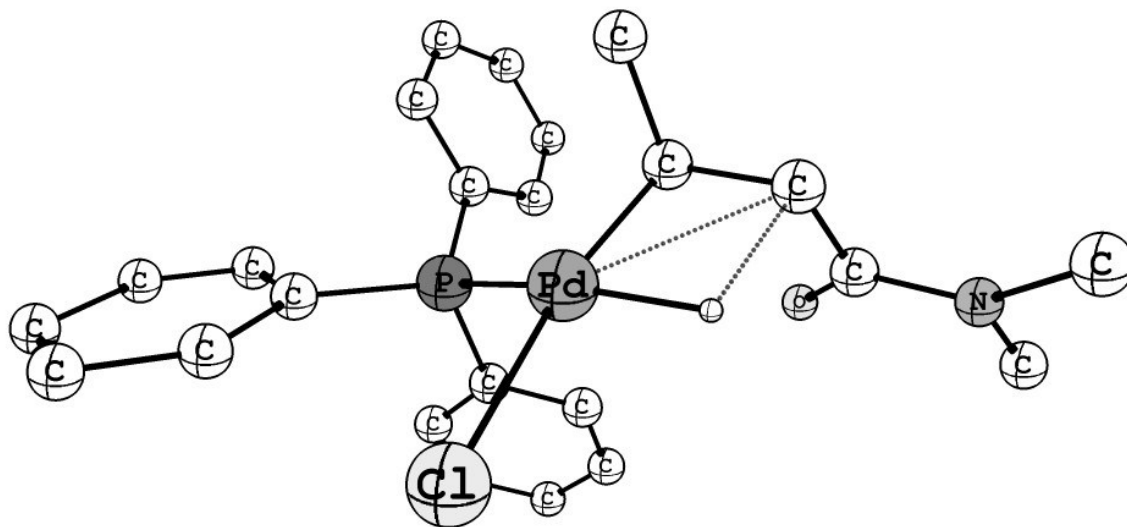

|    |              |              |              |
|----|--------------|--------------|--------------|
| Pd | -0.746074000 | -0.972217000 | -0.917914000 |
| Cl | -0.262420000 | -3.340412000 | -0.914389000 |
| C  | -3.182248000 | 0.340997000  | -1.184575000 |
| C  | -1.719436000 | 0.787965000  | -1.227426000 |
| C  | -1.248483000 | 1.295930000  | -2.579379000 |
| H  | -1.474868000 | 1.423666000  | -0.367925000 |
| H  | -3.679196000 | 0.104951000  | -2.126198000 |
| P  | 1.217742000  | 0.059333000  | 0.006772000  |
| C  | 1.357262000  | 1.867613000  | -0.262661000 |
| C  | 1.960790000  | 2.342679000  | -1.441061000 |
| C  | 0.754062000  | 2.783130000  | 0.612819000  |
| C  | 1.974404000  | 3.708381000  | -1.726614000 |
| H  | 2.426092000  | 1.641753000  | -2.137649000 |
| C  | 0.761924000  | 4.150569000  | 0.318811000  |
| H  | 0.279606000  | 2.433103000  | 1.530877000  |
| C  | 1.372265000  | 4.616494000  | -0.848192000 |
| H  | 2.453568000  | 4.064841000  | -2.641303000 |
| H  | 0.290455000  | 4.852968000  | 1.009941000  |
| H  | 1.380201000  | 5.685123000  | -1.074435000 |
| C  | 1.019262000  | -0.111498000 | 1.827531000  |
| C  | 2.115635000  | -0.269952000 | 2.688677000  |
| C  | -0.280422000 | -0.075715000 | 2.365125000  |
| C  | 1.916496000  | -0.384764000 | 4.067325000  |
| H  | 3.128557000  | -0.310064000 | 2.285912000  |
| C  | -0.472353000 | -0.179686000 | 3.745117000  |
| H  | -1.152575000 | 0.041110000  | 1.715968000  |
| C  | 0.624035000  | -0.337369000 | 4.598752000  |
| H  | 2.776994000  | -0.513008000 | 4.728134000  |
| H  | -1.486210000 | -0.143373000 | 4.150373000  |

|   |              |              |              |
|---|--------------|--------------|--------------|
| H | 0.471371000  | -0.427752000 | 5.676769000  |
| C | 2.894746000  | -0.582698000 | -0.351633000 |
| C | 3.021393000  | -1.904124000 | -0.809214000 |
| C | 4.048988000  | 0.192831000  | -0.143594000 |
| C | 4.289251000  | -2.441150000 | -1.051647000 |
| H | 2.125823000  | -2.511319000 | -0.965747000 |
| C | 5.311978000  | -0.348817000 | -0.391127000 |
| H | 3.962866000  | 1.221784000  | 0.209557000  |
| C | 5.434435000  | -1.666494000 | -0.845517000 |
| H | 4.380615000  | -3.470153000 | -1.407368000 |
| H | 6.203728000  | 0.260694000  | -0.227565000 |
| H | 6.423690000  | -2.087453000 | -1.040153000 |
| C | -3.911083000 | 0.405626000  | 0.122854000  |
| O | -3.361013000 | 0.897340000  | 1.112205000  |
| N | -5.183469000 | -0.075005000 | 0.139788000  |
| H | -1.731739000 | 2.260058000  | -2.816293000 |
| H | -0.164535000 | 1.461306000  | -2.594454000 |
| H | -1.500884000 | 0.587781000  | -3.384658000 |
| C | -5.979775000 | 0.068380000  | 1.348702000  |
| H | -6.924329000 | 0.589111000  | 1.121919000  |
| H | -6.221790000 | -0.920206000 | 1.773570000  |
| H | -5.409947000 | 0.646058000  | 2.083348000  |
| C | -5.823627000 | -0.734216000 | -0.993114000 |
| H | -6.232209000 | -0.011001000 | -1.718766000 |
| H | -5.129885000 | -1.410759000 | -1.508900000 |
| H | -6.655167000 | -1.343316000 | -0.615473000 |
| H | -2.290401000 | -1.305277000 | -0.908319000 |

## 3H-a

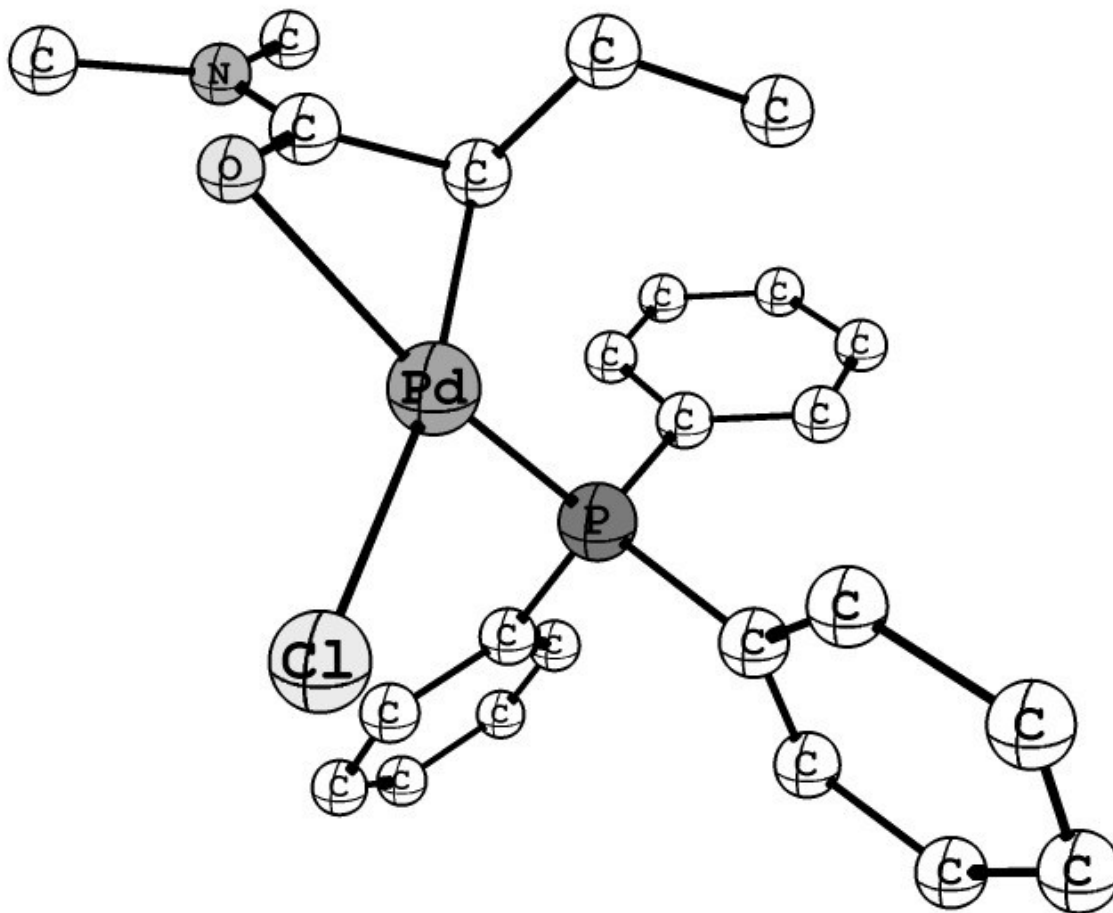

|    |             |              |              |
|----|-------------|--------------|--------------|
| Pd | 1.033624000 | -0.888818000 | -0.659576000 |
| Cl | 0.050233000 | -3.044007000 | -1.199222000 |
| C  | 2.368165000 | 1.503344000  | -1.848485000 |
| C  | 2.288366000 | 0.753626000  | -0.518574000 |
| C  | 1.177184000 | 2.405951000  | -2.149173000 |
| H  | 0.252547000 | 1.821765000  | -2.258864000 |
| H  | 1.010555000 | 3.135878000  | -1.342765000 |
| H  | 1.338003000 | 2.963988000  | -3.084944000 |
| C  | 3.368781000 | -0.252558000 | -0.335064000 |
| O  | 3.190429000 | -1.310469000 | -1.020841000 |
| N  | 4.374958000 | -0.133250000 | 0.542424000  |
| C  | 4.634592000 | 1.089662000  | 1.287000000  |
| H  | 4.121752000 | 1.941064000  | 0.827040000  |
| H  | 4.301845000 | 0.993954000  | 2.334278000  |
| H  | 5.716053000 | 1.293644000  | 1.284552000  |
| C  | 5.240050000 | -1.266311000 | 0.840611000  |
| H  | 5.235454000 | -1.463062000 | 1.924866000  |
| H  | 4.873552000 | -2.149216000 | 0.306927000  |

|   |              |              |              |
|---|--------------|--------------|--------------|
| H | 6.275519000  | -1.053576000 | 0.529231000  |
| H | 2.125479000  | 1.423940000  | 0.330306000  |
| H | 3.288903000  | 2.120375000  | -1.833079000 |
| P | -0.865274000 | 0.017751000  | 0.133476000  |
| H | 2.508675000  | 0.779104000  | -2.667634000 |
| C | -0.814075000 | 1.794349000  | 0.574507000  |
| C | -1.586428000 | 2.754134000  | -0.091904000 |
| C | 0.069198000  | 2.202967000  | 1.588773000  |
| C | -1.469754000 | 4.106541000  | 0.244603000  |
| H | -2.275116000 | 2.452373000  | -0.882042000 |
| C | 0.180768000  | 3.551976000  | 1.925211000  |
| H | 0.665454000  | 1.460692000  | 2.124855000  |
| C | -0.585792000 | 4.508614000  | 1.248889000  |
| H | -2.073771000 | 4.847783000  | -0.283527000 |
| H | 0.868990000  | 3.858475000  | 2.716102000  |
| H | -0.494843000 | 5.565744000  | 1.508488000  |
| C | -2.250541000 | -0.116547000 | -1.055591000 |
| C | -3.586185000 | -0.150978000 | -0.627258000 |
| C | -1.962613000 | -0.142392000 | -2.428959000 |
| C | -4.620802000 | -0.201016000 | -1.564899000 |
| H | -3.821221000 | -0.139784000 | 0.438412000  |
| C | -2.999390000 | -0.186104000 | -3.363690000 |
| H | -0.923186000 | -0.136525000 | -2.763352000 |
| C | -4.329539000 | -0.215741000 | -2.932938000 |
| H | -5.658454000 | -0.229930000 | -1.224720000 |
| H | -2.766833000 | -0.204408000 | -4.430782000 |
| H | -5.140362000 | -0.255744000 | -3.664008000 |
| C | -1.475812000 | -0.768212000 | 1.679041000  |
| C | -1.270506000 | -2.141942000 | 1.887953000  |
| C | -2.181454000 | -0.021810000 | 2.638648000  |
| C | -1.765037000 | -2.755492000 | 3.041612000  |
| H | -0.736992000 | -2.726117000 | 1.135110000  |
| C | -2.672741000 | -0.642003000 | 3.790230000  |
| H | -2.349637000 | 1.045659000  | 2.491253000  |
| C | -2.464120000 | -2.009026000 | 3.995369000  |
| H | -1.600331000 | -3.824487000 | 3.196208000  |
| H | -3.219915000 | -0.052218000 | 4.529266000  |
| H | -2.845730000 | -2.491579000 | 4.898244000  |

## 3H-b

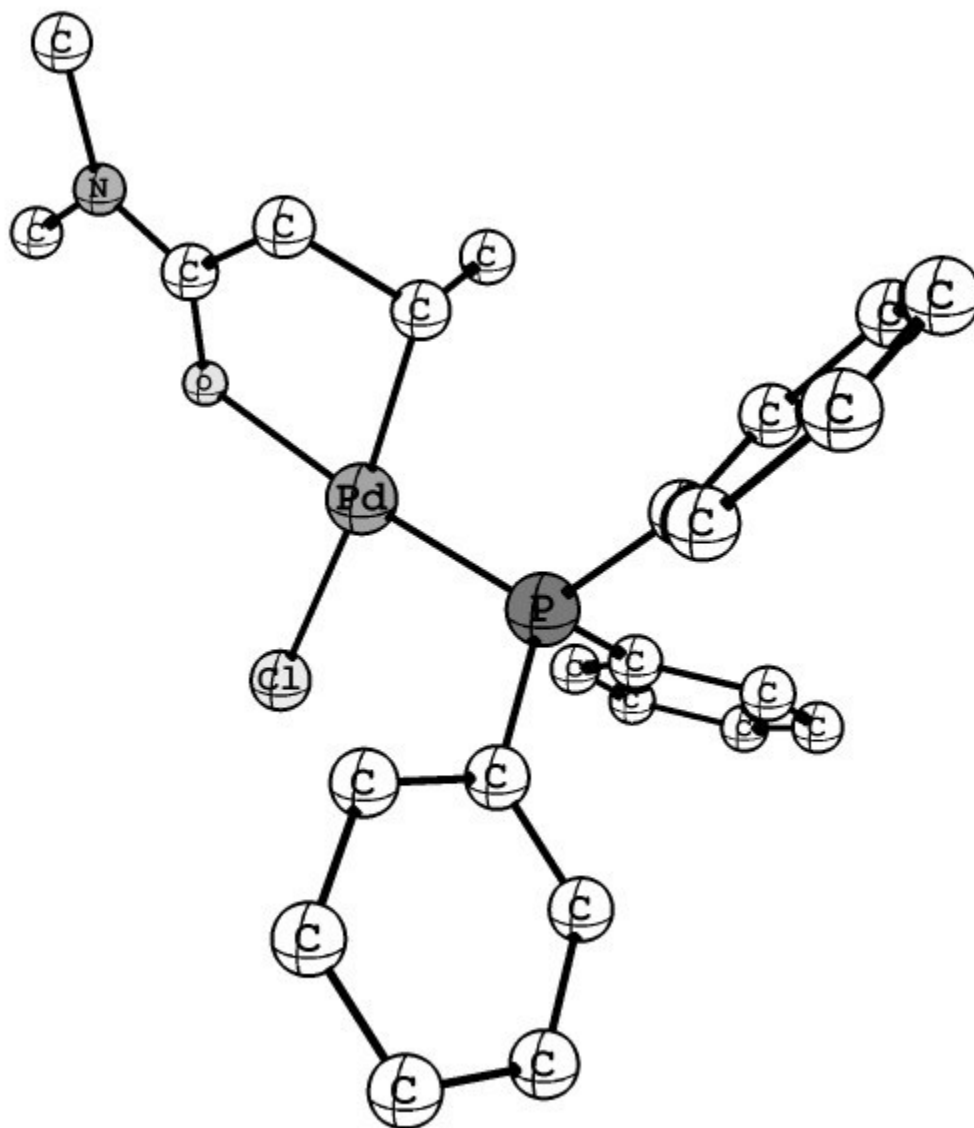

|    |              |              |              |
|----|--------------|--------------|--------------|
| Pd | -1.036996000 | -0.604987000 | -0.190818000 |
| Cl | -0.451415000 | -3.006984000 | -0.205447000 |
| C  | -1.777440000 | 1.309833000  | -0.273422000 |
| C  | -3.122687000 | 1.250654000  | 0.469972000  |
| C  | -1.946898000 | 1.701639000  | -1.737223000 |
| H  | -2.588939000 | 0.988140000  | -2.279710000 |
| H  | -2.416109000 | 2.700761000  | -1.826636000 |
| H  | -0.980977000 | 1.741240000  | -2.261161000 |
| C  | -3.877120000 | 0.007643000  | 0.058973000  |
| O  | -3.196888000 | -0.996784000 | -0.278945000 |
| N  | -5.216314000 | -0.041288000 | 0.059251000  |
| C  | -6.072725000 | 1.048238000  | 0.510969000  |



|   |              |              |              |
|---|--------------|--------------|--------------|
| H | -5.534374000 | 1.729362000  | 1.177026000  |
| H | -6.475382000 | 1.618126000  | -0.343043000 |
| H | -6.918008000 | 0.624752000  | 1.072814000  |
| C | -5.910350000 | -1.232847000 | -0.415384000 |
| H | -6.672520000 | -0.942675000 | -1.155098000 |
| H | -5.190808000 | -1.914857000 | -0.878156000 |
| H | -6.412636000 | -1.745360000 | 0.421311000  |
| H | -2.954779000 | 1.176272000  | 1.558750000  |
| H | -1.127551000 | 2.029848000  | 0.238032000  |
| H | -3.702372000 | 2.172372000  | 0.298715000  |
| P | 1.103255000  | 0.051142000  | 0.015605000  |
| C | 1.887301000  | -0.750252000 | 1.467257000  |
| C | 3.246349000  | -1.093382000 | 1.491930000  |
| C | 1.092014000  | -0.993559000 | 2.599129000  |
| C | 3.803327000  | -1.667561000 | 2.638383000  |
| H | 3.873759000  | -0.921357000 | 0.616308000  |
| C | 1.653587000  | -1.557961000 | 3.746006000  |
| H | 0.029355000  | -0.740656000 | 2.573937000  |
| C | 3.010537000  | -1.897788000 | 3.766677000  |
| H | 4.861820000  | -1.937731000 | 2.647425000  |
| H | 1.028181000  | -1.740986000 | 4.622746000  |
| H | 3.448533000  | -2.347714000 | 4.660714000  |
| C | 2.183649000  | -0.334179000 | -1.416041000 |
| C | 3.380136000  | 0.370794000  | -1.637505000 |
| C | 1.821497000  | -1.370012000 | -2.291780000 |
| C | 4.197699000  | 0.045632000  | -2.722039000 |
| H | 3.674520000  | 1.179563000  | -0.966874000 |
| C | 2.643793000  | -1.690524000 | -3.375479000 |
| H | 0.908517000  | -1.937307000 | -2.101239000 |
| C | 3.829599000  | -0.983527000 | -3.594880000 |
| H | 5.124476000  | 0.600268000  | -2.885860000 |
| H | 2.353889000  | -2.497298000 | -4.052778000 |
| H | 4.468012000  | -1.233249000 | -4.445647000 |
| C | 1.392451000  | 1.841723000  | 0.302816000  |
| C | 1.551295000  | 2.350597000  | 1.600306000  |
| C | 1.343922000  | 2.734095000  | -0.781715000 |
| C | 1.662189000  | 3.728812000  | 1.808293000  |
| H | 1.590042000  | 1.672829000  | 2.454284000  |
| C | 1.457584000  | 4.108908000  | -0.571306000 |
| H | 1.223632000  | 2.353529000  | -1.797399000 |
| C | 1.615448000  | 4.610658000  | 0.725270000  |
| H | 1.789252000  | 4.112493000  | 2.823236000  |
| H | 1.422298000  | 4.791146000  | -1.423734000 |
| H | 1.703548000  | 5.686979000  | 0.889747000  |

## 4H-a

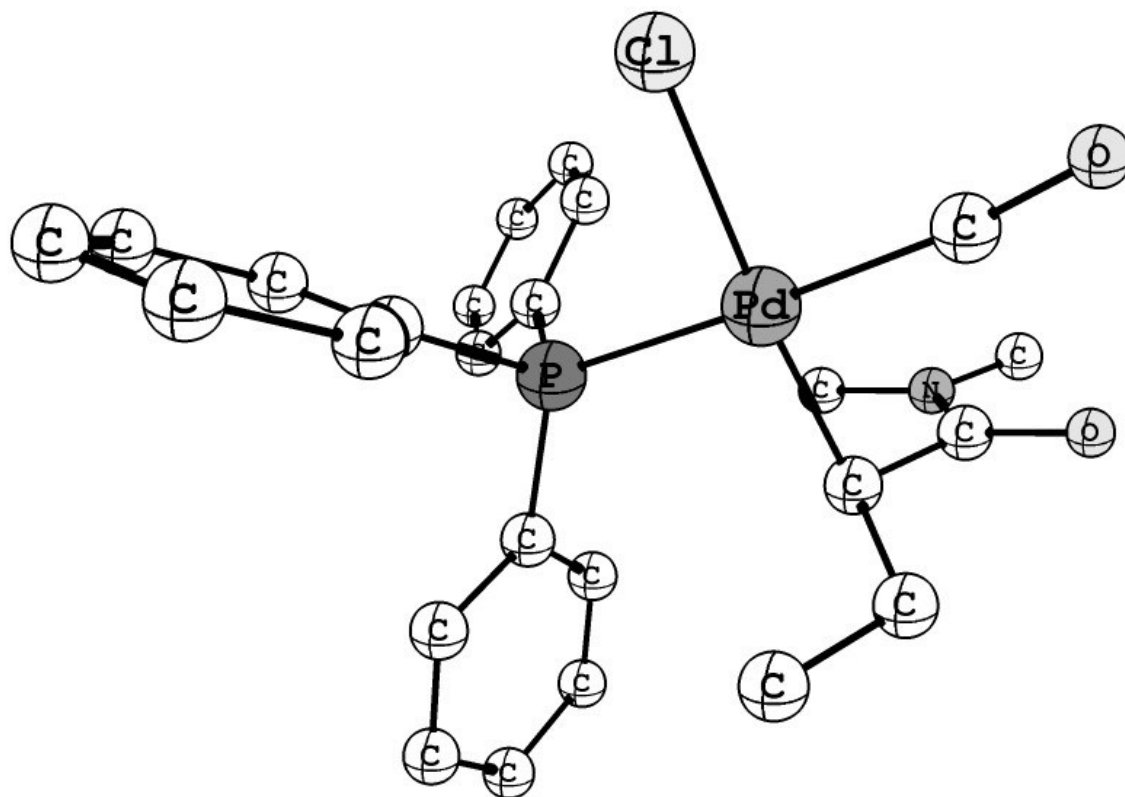

|    |              |              |              |
|----|--------------|--------------|--------------|
| Pd | -1.024300000 | -1.092254000 | -0.271590000 |
| C  | -2.293451000 | -0.680544000 | 2.448204000  |
| C  | -2.099081000 | 0.061204000  | 1.130004000  |
| C  | -1.006780000 | -1.039487000 | 3.185482000  |
| H  | -0.375770000 | -1.714670000 | 2.585686000  |
| H  | -0.407680000 | -0.146601000 | 3.415093000  |
| H  | -1.231209000 | -1.547762000 | 4.136434000  |
| C  | -3.418832000 | 0.349638000  | 0.448960000  |
| O  | -4.405488000 | -0.362768000 | 0.669975000  |
| N  | -3.487880000 | 1.396555000  | -0.431122000 |
| C  | -2.382285000 | 2.280778000  | -0.747415000 |
| H  | -1.429351000 | 1.743251000  | -0.742983000 |
| H  | -2.519083000 | 2.673470000  | -1.764995000 |
| H  | -2.320247000 | 3.141224000  | -0.057254000 |
| C  | -4.762375000 | 1.732212000  | -1.043171000 |
| H  | -4.683168000 | 1.703763000  | -2.143033000 |
| H  | -5.513198000 | 1.007206000  | -0.713415000 |
| H  | -5.082183000 | 2.747064000  | -0.749159000 |
| H  | -1.522710000 | 0.974795000  | 1.300446000  |
| H  | -2.911608000 | -0.036396000 | 3.103416000  |
| H  | -2.899333000 | -1.582380000 | 2.276884000  |
| C  | -2.549539000 | -2.310328000 | -0.447654000 |

|    |              |              |              |
|----|--------------|--------------|--------------|
| O  | -3.322924000 | -3.121839000 | -0.622384000 |
| Cl | 0.055888000  | -2.411491000 | -2.028243000 |
| P  | 0.968883000  | 0.166525000  | -0.030878000 |
| C  | 1.209411000  | 1.173011000  | 1.482767000  |
| C  | 0.496767000  | 2.373971000  | 1.649114000  |
| C  | 2.036095000  | 0.722138000  | 2.523100000  |
| C  | 0.597763000  | 3.098268000  | 2.837830000  |
| H  | -0.128377000 | 2.760984000  | 0.845075000  |
| C  | 2.135896000  | 1.450535000  | 3.711238000  |
| H  | 2.600409000  | -0.203914000 | 2.414311000  |
| C  | 1.413653000  | 2.635391000  | 3.875111000  |
| H  | 0.037625000  | 4.028918000  | 2.951102000  |
| H  | 2.782857000  | 1.086644000  | 4.512464000  |
| H  | 1.491073000  | 3.201318000  | 4.806075000  |
| C  | 2.412206000  | -0.957853000 | -0.027259000 |
| C  | 3.620219000  | -0.598689000 | -0.639670000 |
| C  | 2.312927000  | -2.183748000 | 0.650005000  |
| C  | 4.721288000  | -1.457431000 | -0.570024000 |
| H  | 3.705317000  | 0.347683000  | -1.175827000 |
| C  | 3.417648000  | -3.032756000 | 0.726866000  |
| H  | 1.368491000  | -2.476368000 | 1.113264000  |
| C  | 4.623259000  | -2.671855000 | 0.114836000  |
| H  | 5.658633000  | -1.174035000 | -1.053996000 |
| H  | 3.334453000  | -3.983293000 | 1.258383000  |
| H  | 5.485215000  | -3.340808000 | 0.168670000  |
| C  | 1.235325000  | 1.335744000  | -1.413424000 |
| C  | 2.014429000  | 2.493527000  | -1.251579000 |
| C  | 0.669454000  | 1.050077000  | -2.667286000 |
| C  | 2.215768000  | 3.358874000  | -2.329533000 |
| H  | 2.463329000  | 2.724669000  | -0.284651000 |
| C  | 0.875821000  | 1.918931000  | -3.740769000 |
| H  | 0.083121000  | 0.139177000  | -2.800237000 |
| C  | 1.644287000  | 3.075455000  | -3.573654000 |
| H  | 2.821401000  | 4.257762000  | -2.194685000 |
| H  | 0.430831000  | 1.691809000  | -4.712108000 |
| H  | 1.798857000  | 3.756250000  | -4.413886000 |

## 4H-b

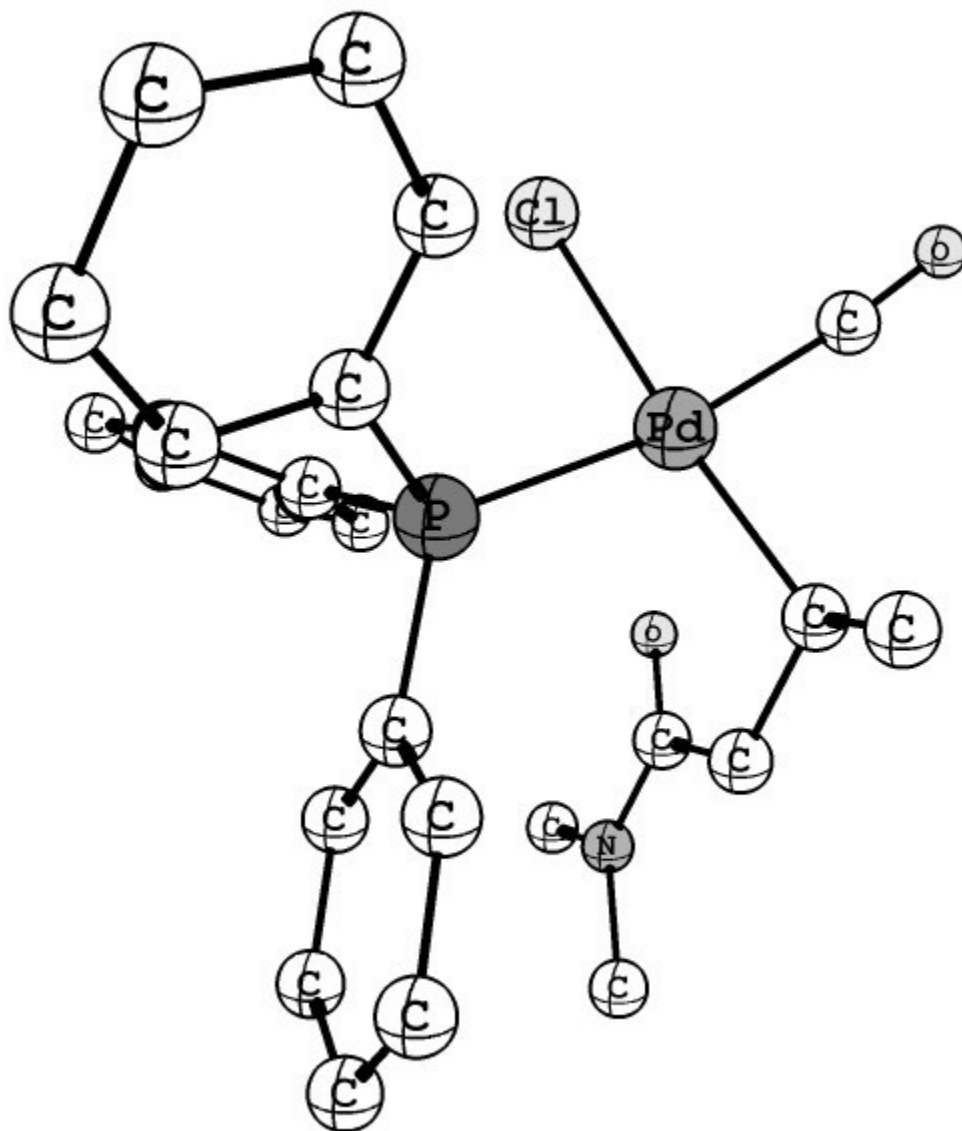

|    |              |              |              |
|----|--------------|--------------|--------------|
| Pd | 0.338167000  | 1.859313000  | -0.130855000 |
| C  | -1.135079000 | 1.923283000  | -1.627848000 |
| C  | -2.304576000 | 0.972843000  | -1.417063000 |
| C  | -0.505255000 | 1.755625000  | -3.003465000 |
| H  | -0.037942000 | 0.766670000  | -3.122587000 |
| H  | -1.270285000 | 1.850270000  | -3.798231000 |
| H  | 0.267081000  | 2.515261000  | -3.194348000 |
| C  | -2.860747000 | 0.926333000  | -0.002767000 |
| O  | -2.361102000 | 1.598561000  | 0.907381000  |
| N  | -3.912629000 | 0.092369000  | 0.224402000  |
| C  | -4.607692000 | -0.654956000 | -0.809912000 |
| H  | -3.962698000 | -0.851138000 | -1.670800000 |

|    |              |              |              |
|----|--------------|--------------|--------------|
| H  | -4.918359000 | -1.628348000 | -0.403320000 |
| H  | -5.511867000 | -0.121269000 | -1.153265000 |
| C  | -4.499334000 | 0.013384000  | 1.552195000  |
| H  | -4.438011000 | -1.018174000 | 1.937430000  |
| H  | -3.956573000 | 0.685541000  | 2.224209000  |
| H  | -5.562006000 | 0.308059000  | 1.522993000  |
| H  | -3.119684000 | 1.271304000  | -2.103812000 |
| H  | -1.522233000 | 2.946945000  | -1.527321000 |
| H  | -2.036269000 | -0.046687000 | -1.722741000 |
| C  | 0.558138000  | 3.775337000  | -0.329366000 |
| O  | 0.801503000  | 4.882992000  | -0.411671000 |
| Cl | 2.050579000  | 2.017378000  | 1.649633000  |
| P  | 0.624127000  | -0.506484000 | -0.004258000 |
| C  | 2.270623000  | -0.998789000 | -0.649843000 |
| C  | 3.251090000  | -0.023685000 | -0.888918000 |
| C  | 2.566735000  | -2.349607000 | -0.907145000 |
| C  | 4.507408000  | -0.394923000 | -1.376163000 |
| H  | 3.033685000  | 1.022191000  | -0.672239000 |
| C  | 3.824200000  | -2.716011000 | -1.390103000 |
| H  | 1.812316000  | -3.119529000 | -0.738129000 |
| C  | 4.796685000  | -1.738826000 | -1.627496000 |
| H  | 5.262479000  | 0.372548000  | -1.561176000 |
| H  | 4.043279000  | -3.768357000 | -1.584566000 |
| H  | 5.778672000  | -2.026182000 | -2.010547000 |
| C  | -0.491615000 | -1.714036000 | -0.826176000 |
| C  | -1.507085000 | -2.372962000 | -0.117380000 |
| C  | -0.365728000 | -1.937297000 | -2.208984000 |
| C  | -2.379251000 | -3.241088000 | -0.780484000 |
| H  | -1.621637000 | -2.214063000 | 0.954921000  |
| C  | -1.241851000 | -2.799970000 | -2.868325000 |
| H  | 0.426821000  | -1.443020000 | -2.773635000 |
| C  | -2.252732000 | -3.454290000 | -2.155135000 |
| H  | -3.162425000 | -3.751373000 | -0.215763000 |
| H  | -1.132408000 | -2.964672000 | -3.942505000 |
| H  | -2.937461000 | -4.131078000 | -2.670912000 |
| C  | 0.571900000  | -1.031123000 | 1.753515000  |
| C  | 1.477219000  | -1.957306000 | 2.288021000  |
| C  | -0.436141000 | -0.493412000 | 2.572180000  |
| C  | 1.369127000  | -2.351766000 | 3.625082000  |
| H  | 2.275091000  | -2.369796000 | 1.669782000  |
| C  | -0.546750000 | -0.901279000 | 3.903104000  |
| H  | -1.128820000 | 0.249883000  | 2.170294000  |
| C  | 0.355341000  | -1.829968000 | 4.433366000  |
| H  | 2.083306000  | -3.069797000 | 4.034964000  |
| H  | -1.336384000 | -0.482595000 | 4.531556000  |
| H  | 0.272282000  | -2.141249000 | 5.477334000  |

TSH45-a

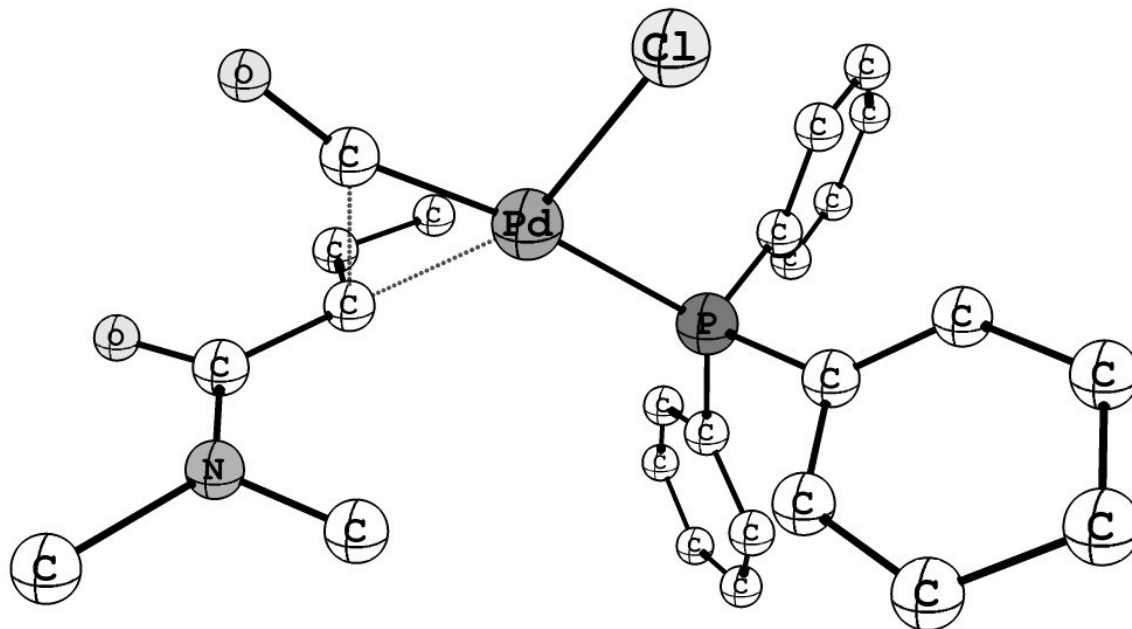

|    |              |              |              |
|----|--------------|--------------|--------------|
| Pd | 1.049280000  | -0.912381000 | 0.438436000  |
| C  | 3.089843000  | -1.113752000 | -2.229349000 |
| C  | 2.895808000  | -0.246763000 | -0.991962000 |
| C  | 4.168516000  | 0.430563000  | -0.512877000 |
| O  | 5.245651000  | 0.055486000  | -0.970795000 |
| N  | 4.074048000  | 1.421567000  | 0.417338000  |
| C  | 2.828189000  | 2.041345000  | 0.840073000  |
| H  | 2.035846000  | 1.302775000  | 0.957688000  |
| H  | 2.984610000  | 2.506180000  | 1.813805000  |
| H  | 2.494163000  | 2.815663000  | 0.139457000  |
| C  | 5.290451000  | 2.117674000  | 0.819625000  |
| H  | 5.306143000  | 2.225618000  | 1.906355000  |
| H  | 6.151311000  | 1.541686000  | 0.494756000  |
| H  | 5.336747000  | 3.114607000  | 0.367879000  |
| H  | 2.101840000  | 0.486374000  | -1.152161000 |
| H  | 3.563358000  | -0.476320000 | -2.982255000 |
| H  | 3.817546000  | -1.896159000 | -2.012663000 |
| C  | 2.801529000  | -1.569293000 | 0.441737000  |
| O  | 3.708727000  | -2.239771000 | 0.685847000  |
| Cl | 0.020076000  | -2.127083000 | 2.216160000  |
| P  | -1.126027000 | 0.142710000  | -0.053711000 |
| C  | 1.789855000  | -1.715406000 | -2.794392000 |
| C  | -1.520097000 | 1.490025000  | -1.223172000 |
| C  | -1.408347000 | 1.132543000  | -2.570123000 |
| C  | -1.931075000 | 2.782368000  | -0.887467000 |
| C  | -1.658179000 | 2.059753000  | -3.573211000 |

|   |              |              |              |
|---|--------------|--------------|--------------|
| H | -1.123783000 | 0.114291000  | -2.829384000 |
| C | -2.190232000 | 3.706474000  | -1.897368000 |
| H | -2.098790000 | 3.066551000  | 0.151787000  |
| C | -2.043482000 | 3.354059000  | -3.235183000 |
| H | -1.559239000 | 1.772857000  | -4.617865000 |
| H | -2.517136000 | 4.710326000  | -1.633980000 |
| H | -2.243945000 | 4.084305000  | -4.016250000 |
| C | -2.417686000 | -1.058375000 | -0.566086000 |
| C | -2.606990000 | -2.191102000 | 0.229975000  |
| C | -3.189763000 | -0.904726000 | -1.724082000 |
| C | -3.570587000 | -3.136795000 | -0.103325000 |
| H | -1.996707000 | -2.332302000 | 1.117706000  |
| C | -4.150800000 | -1.855547000 | -2.053997000 |
| H | -3.035203000 | -0.064832000 | -2.393105000 |
| C | -4.348944000 | -2.968642000 | -1.243870000 |
| H | -3.710594000 | -4.010931000 | 0.529334000  |
| H | -4.743863000 | -1.727239000 | -2.957193000 |
| H | -5.100817000 | -3.709596000 | -1.507516000 |
| C | -1.822060000 | 0.856555000  | 1.451174000  |
| C | -2.889467000 | 0.316487000  | 2.158185000  |
| C | -1.178814000 | 2.010454000  | 1.904373000  |
| C | -3.316324000 | 0.938388000  | 3.329883000  |
| H | -3.382354000 | -0.582727000 | 1.796255000  |
| C | -1.603776000 | 2.625264000  | 3.076086000  |
| H | -0.360886000 | 2.426334000  | 1.312472000  |
| C | -2.672793000 | 2.085498000  | 3.788995000  |
| H | -4.151408000 | 0.524109000  | 3.890898000  |
| H | -1.108851000 | 3.526370000  | 3.432004000  |
| H | -3.008992000 | 2.564360000  | 4.706255000  |
| H | 0.954651000  | -1.495523000 | -2.141712000 |
| H | 1.577275000  | -1.306381000 | -3.773170000 |
| H | 1.879314000  | -2.790097000 | -2.880105000 |

TSH45-b

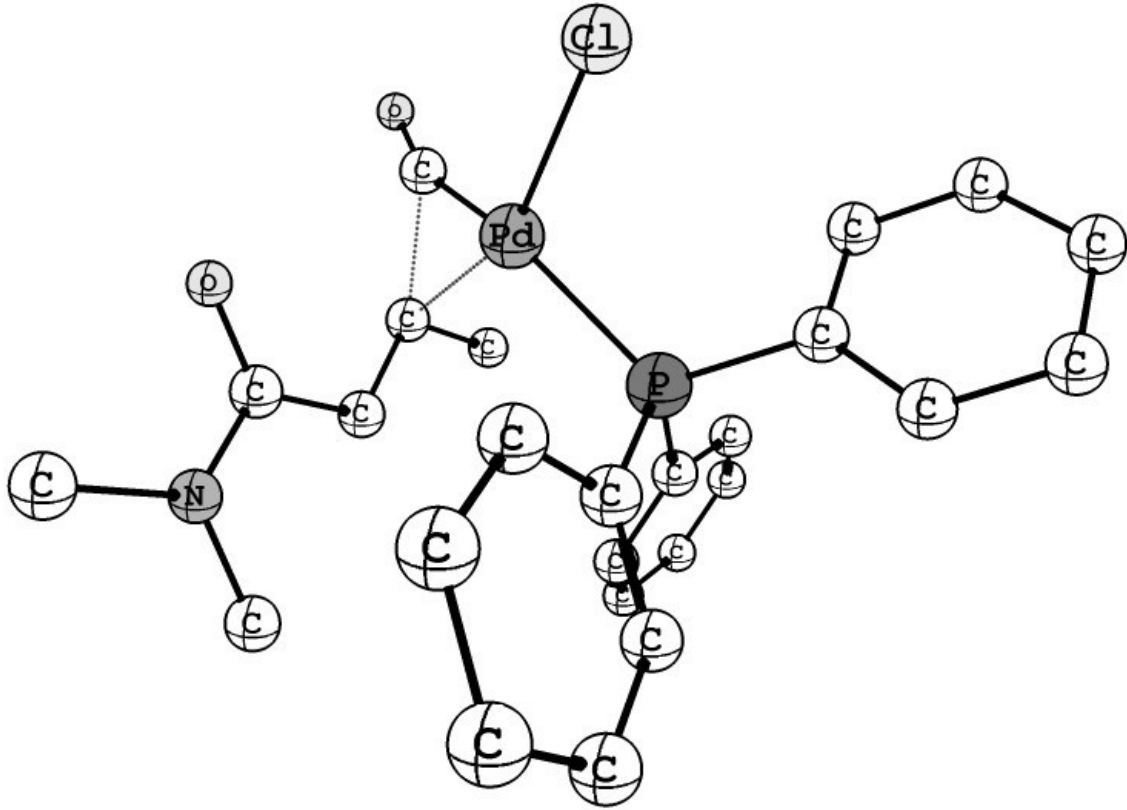

|    |              |              |              |
|----|--------------|--------------|--------------|
| Pd | -0.536981000 | -1.522129000 | -0.573958000 |
| C  | -2.149782000 | -1.807734000 | 1.162540000  |
| C  | -2.623163000 | -0.361074000 | 1.196917000  |
| C  | -3.392295000 | 0.084212000  | -0.036745000 |
| O  | -3.692063000 | -0.723689000 | -0.918757000 |
| N  | -3.754508000 | 1.384432000  | -0.106612000 |
| C  | -3.382038000 | 2.388892000  | 0.879555000  |
| H  | -3.138065000 | 1.936625000  | 1.834165000  |
| H  | -2.529206000 | 2.980204000  | 0.540124000  |
| H  | -4.226237000 | 3.059307000  | 1.039276000  |
| C  | -4.436029000 | 1.853431000  | -1.304360000 |
| H  | -5.128069000 | 2.646952000  | -1.029705000 |
| H  | -3.724546000 | 2.254221000  | -2.035233000 |
| H  | -4.975338000 | 1.032757000  | -1.761977000 |
| H  | -3.309057000 | -0.284316000 | 2.051234000  |
| H  | -3.043375000 | -2.425852000 | 1.181765000  |
| C  | -1.699551000 | -2.944846000 | -0.361854000 |
| O  | -2.113931000 | -4.018362000 | -0.445108000 |
| Cl | 0.547394000  | -2.098779000 | -2.630908000 |
| P  | 1.031619000  | 0.252623000  | 0.043025000  |
| H  | -1.802006000 | 0.316725000  | 1.412200000  |



|   |              |              |              |
|---|--------------|--------------|--------------|
| C | -1.257825000 | -2.174776000 | 2.340303000  |
| C | 1.259635000  | 0.385014000  | 1.847553000  |
| C | 2.141102000  | -0.496384000 | 2.479522000  |
| C | 0.447565000  | 1.205875000  | 2.634617000  |
| C | 2.214046000  | -0.548005000 | 3.865030000  |
| H | 2.776592000  | -1.140676000 | 1.887220000  |
| C | 0.521505000  | 1.152668000  | 4.020734000  |
| H | -0.239283000 | 1.898292000  | 2.169636000  |
| C | 1.402889000  | 0.274522000  | 4.640099000  |
| H | 2.907048000  | -1.230363000 | 4.339495000  |
| H | -0.113263000 | 1.797073000  | 4.614800000  |
| H | 1.460225000  | 0.232884000  | 5.719713000  |
| C | 2.745121000  | 0.155507000  | -0.588766000 |
| C | 3.527435000  | 1.290304000  | -0.806068000 |
| C | 3.296671000  | -1.103726000 | -0.834165000 |
| C | 4.837215000  | 1.168216000  | -1.251621000 |
| H | 3.117262000  | 2.274804000  | -0.641359000 |
| C | 4.610840000  | -1.225750000 | -1.268969000 |
| H | 2.691753000  | -1.988591000 | -0.703313000 |
| C | 5.383449000  | -0.090186000 | -1.481074000 |
| H | 5.429362000  | 2.057778000  | -1.422736000 |
| H | 5.024793000  | -2.208226000 | -1.454405000 |
| H | 6.403323000  | -0.183501000 | -1.830878000 |
| C | 0.430924000  | 1.877948000  | -0.527881000 |
| C | -0.355445000 | 1.886713000  | -1.683876000 |
| C | 0.731077000  | 3.093671000  | 0.092741000  |
| C | -0.803099000 | 3.084667000  | -2.225834000 |
| H | -0.615289000 | 0.951705000  | -2.161673000 |
| C | 0.260497000  | 4.288305000  | -0.435665000 |
| H | 1.335699000  | 3.117044000  | 0.987330000  |
| C | -0.502536000 | 4.287487000  | -1.598675000 |
| H | -1.400887000 | 3.075584000  | -3.127439000 |
| H | 0.496228000  | 5.221448000  | 0.058710000  |
| H | -0.869003000 | 5.219738000  | -2.007646000 |
| H | -1.809741000 | -2.021396000 | 3.273625000  |
| H | -0.959162000 | -3.222017000 | 2.302495000  |
| H | -0.358354000 | -1.564711000 | 2.379581000  |

## 5H-a

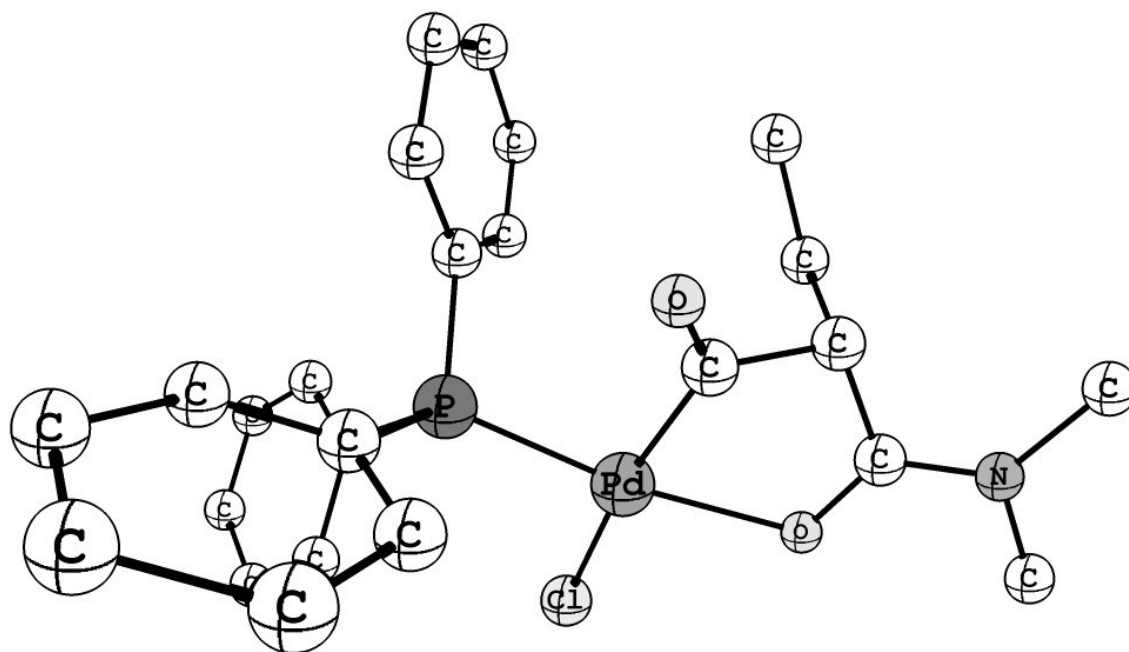

|    |              |              |              |
|----|--------------|--------------|--------------|
| Pd | 0.795240000  | -0.967119000 | -0.073934000 |
| C  | 3.111781000  | 1.562263000  | -0.937856000 |
| C  | 3.078171000  | 0.754607000  | 0.387734000  |
| C  | 2.665274000  | 3.010522000  | -0.766745000 |
| H  | 1.638075000  | 3.074910000  | -0.383037000 |
| H  | 3.324875000  | 3.545436000  | -0.064524000 |
| H  | 2.694855000  | 3.537093000  | -1.732175000 |
| H  | 4.137821000  | 1.529272000  | -1.337725000 |
| H  | 3.593031000  | 1.324897000  | 1.174472000  |
| C  | 1.600555000  | 0.600475000  | 0.834996000  |
| O  | 1.133508000  | 1.390740000  | 1.618126000  |
| H  | 2.473291000  | 1.044115000  | -1.672635000 |
| Cl | 0.152920000  | -3.016291000 | -1.260752000 |
| P  | -1.240599000 | 0.017467000  | 0.029200000  |
| C  | 3.678833000  | -0.621206000 | 0.193102000  |
| O  | 2.901560000  | -1.576553000 | -0.061759000 |
| N  | 5.002243000  | -0.809757000 | 0.265245000  |
| C  | 5.566811000  | -2.138106000 | 0.049352000  |
| H  | 4.759152000  | -2.869937000 | -0.041036000 |
| H  | 6.173329000  | -2.145289000 | -0.870584000 |
| H  | 6.216041000  | -2.403696000 | 0.897764000  |
| C  | 5.984319000  | 0.242638000  | 0.490532000  |
| H  | 6.630725000  | 0.350067000  | -0.395224000 |
| H  | 5.507190000  | 1.204425000  | 0.694295000  |
| H  | 6.617962000  | -0.022707000 | 1.350980000  |

|   |              |              |              |
|---|--------------|--------------|--------------|
| C | -2.617048000 | -0.759567000 | -0.899277000 |
| C | -2.982799000 | -2.068622000 | -0.541171000 |
| C | -3.326924000 | -0.095951000 | -1.908975000 |
| C | -4.048924000 | -2.698785000 | -1.181102000 |
| H | -2.427218000 | -2.593625000 | 0.236851000  |
| C | -4.390845000 | -0.735975000 | -2.554971000 |
| H | -3.060809000 | 0.922645000  | -2.192150000 |
| C | -4.753636000 | -2.034885000 | -2.193015000 |
| H | -4.328211000 | -3.715432000 | -0.894893000 |
| H | -4.938919000 | -0.210737000 | -3.340599000 |
| H | -5.585793000 | -2.532021000 | -2.697016000 |
| C | -1.127815000 | 1.719269000  | -0.634130000 |
| C | -1.459525000 | 2.856118000  | 0.111864000  |
| C | -0.618009000 | 1.868205000  | -1.936101000 |
| C | -1.302342000 | 4.129014000  | -0.447191000 |
| H | -1.828287000 | 2.754439000  | 1.132644000  |
| C | -0.478039000 | 3.137860000  | -2.495506000 |
| H | -0.320612000 | 0.985963000  | -2.508622000 |
| C | -0.821565000 | 4.272287000  | -1.750924000 |
| H | -1.557377000 | 5.012164000  | 0.142964000  |
| H | -0.085869000 | 3.243601000  | -3.509317000 |
| H | -0.702095000 | 5.267814000  | -2.184329000 |
| C | -1.939217000 | 0.129292000  | 1.715682000  |
| C | -3.236997000 | 0.633401000  | 1.906142000  |
| C | -1.206538000 | -0.334117000 | 2.816903000  |
| C | -3.785305000 | 0.689661000  | 3.188467000  |
| H | -3.823379000 | 0.974038000  | 1.050006000  |
| C | -1.761385000 | -0.282567000 | 4.098470000  |
| H | -0.204830000 | -0.738460000 | 2.664563000  |
| C | -3.047259000 | 0.232524000  | 4.286280000  |
| H | -4.793744000 | 1.084661000  | 3.330638000  |
| H | -1.187125000 | -0.648575000 | 4.952536000  |
| H | -3.479478000 | 0.272051000  | 5.288881000  |

## 5H-b

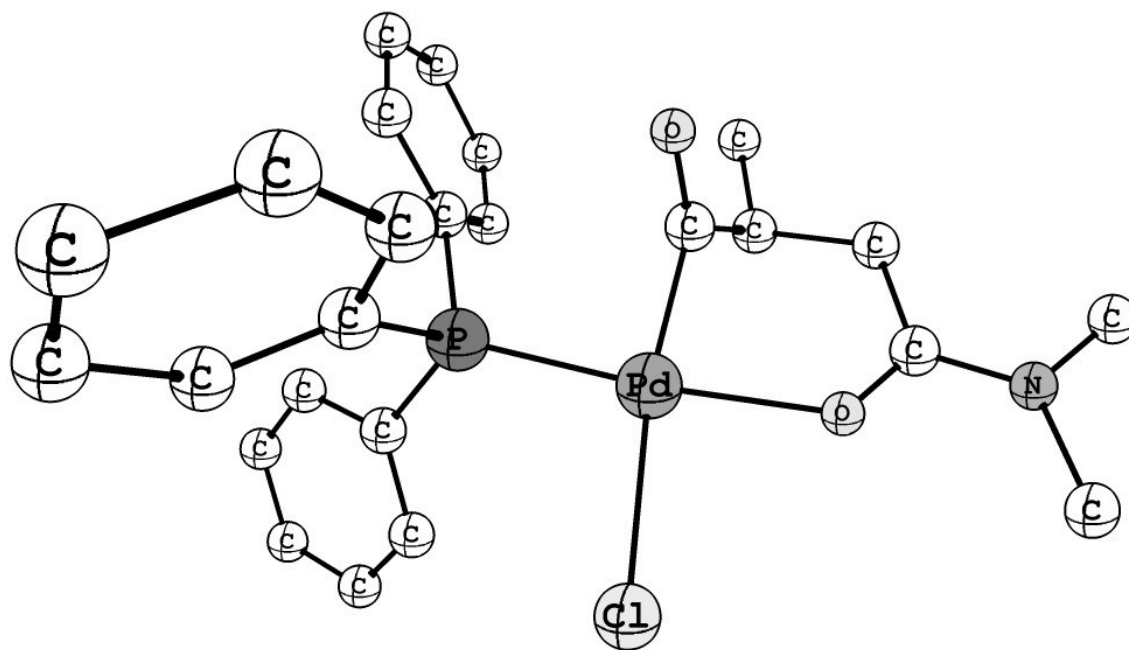

|    |              |              |              |
|----|--------------|--------------|--------------|
| Pd | 0.904133000  | -0.654349000 | -0.048571000 |
| C  | 2.434299000  | 1.778708000  | -0.561278000 |
| C  | 3.848314000  | 1.298583000  | -0.194914000 |
| C  | 2.371452000  | 3.307634000  | -0.553353000 |
| H  | 2.601134000  | 3.696389000  | 0.449506000  |
| H  | 3.097675000  | 3.726461000  | -1.266339000 |
| H  | 1.367732000  | 3.656740000  | -0.831676000 |
| H  | 4.558626000  | 1.723249000  | -0.918958000 |
| H  | 2.185461000  | 1.394522000  | -1.562802000 |
| H  | 4.128531000  | 1.714392000  | 0.789027000  |
| C  | 1.430821000  | 1.174119000  | 0.434746000  |
| O  | 1.168339000  | 1.711686000  | 1.483793000  |
| Cl | 0.598557000  | -3.100173000 | -0.361652000 |
| P  | -1.295249000 | -0.061420000 | -0.023095000 |
| C  | 4.031790000  | -0.206941000 | -0.129978000 |
| O  | 3.062441000  | -0.996226000 | -0.091482000 |
| N  | 5.288727000  | -0.681066000 | -0.097270000 |
| C  | 5.536345000  | -2.119007000 | -0.084931000 |
| H  | 6.164818000  | -2.397375000 | -0.945561000 |
| H  | 6.060744000  | -2.406486000 | 0.840175000  |
| H  | 4.582744000  | -2.652135000 | -0.142383000 |
| C  | 6.464858000  | 0.183537000  | -0.123411000 |
| H  | 6.335632000  | 1.059309000  | 0.524656000  |
| H  | 7.322379000  | -0.387263000 | 0.254106000  |
| H  | 6.698639000  | 0.523810000  | -1.145795000 |

|   |              |              |              |
|---|--------------|--------------|--------------|
| C | -2.397843000 | -0.677593000 | -1.354382000 |
| C | -2.077145000 | -1.836533000 | -2.076668000 |
| C | -3.593760000 | 0.007203000  | -1.637313000 |
| C | -2.944690000 | -2.301447000 | -3.070038000 |
| H | -1.158134000 | -2.379156000 | -1.843342000 |
| C | -4.456017000 | -0.464221000 | -2.628522000 |
| H | -3.852829000 | 0.911311000  | -1.083792000 |
| C | -4.131693000 | -1.618828000 | -3.349238000 |
| H | -2.687903000 | -3.204094000 | -3.629689000 |
| H | -5.382945000 | 0.073860000  | -2.839960000 |
| H | -4.805078000 | -1.984237000 | -4.128238000 |
| C | -1.595889000 | 1.747499000  | -0.092337000 |
| C | -2.153688000 | 2.472659000  | 0.966240000  |
| C | -1.204988000 | 2.419245000  | -1.262851000 |
| C | -2.315587000 | 3.858606000  | 0.856681000  |
| H | -2.460470000 | 1.962347000  | 1.880056000  |
| C | -1.377808000 | 3.798525000  | -1.373483000 |
| H | -0.760757000 | 1.859413000  | -2.090256000 |
| C | -1.930043000 | 4.523033000  | -0.309678000 |
| H | -2.747622000 | 4.418699000  | 1.689182000  |
| H | -1.074274000 | 4.312007000  | -2.288593000 |
| H | -2.058550000 | 5.604613000  | -0.392708000 |
| C | -2.058230000 | -0.610930000 | 1.547278000  |
| C | -3.303667000 | -1.251368000 | 1.600942000  |
| C | -1.338150000 | -0.385928000 | 2.734683000  |
| C | -3.827491000 | -1.658205000 | 2.832524000  |
| H | -3.865746000 | -1.437751000 | 0.684697000  |
| C | -1.870848000 | -0.785253000 | 3.960950000  |
| H | -0.367635000 | 0.113722000  | 2.688749000  |
| C | -3.115579000 | -1.424415000 | 4.011844000  |
| H | -4.796722000 | -2.161005000 | 2.867397000  |
| H | -1.310266000 | -0.602372000 | 4.880582000  |
| H | -3.527942000 | -1.742975000 | 4.972053000  |

## 6H-a

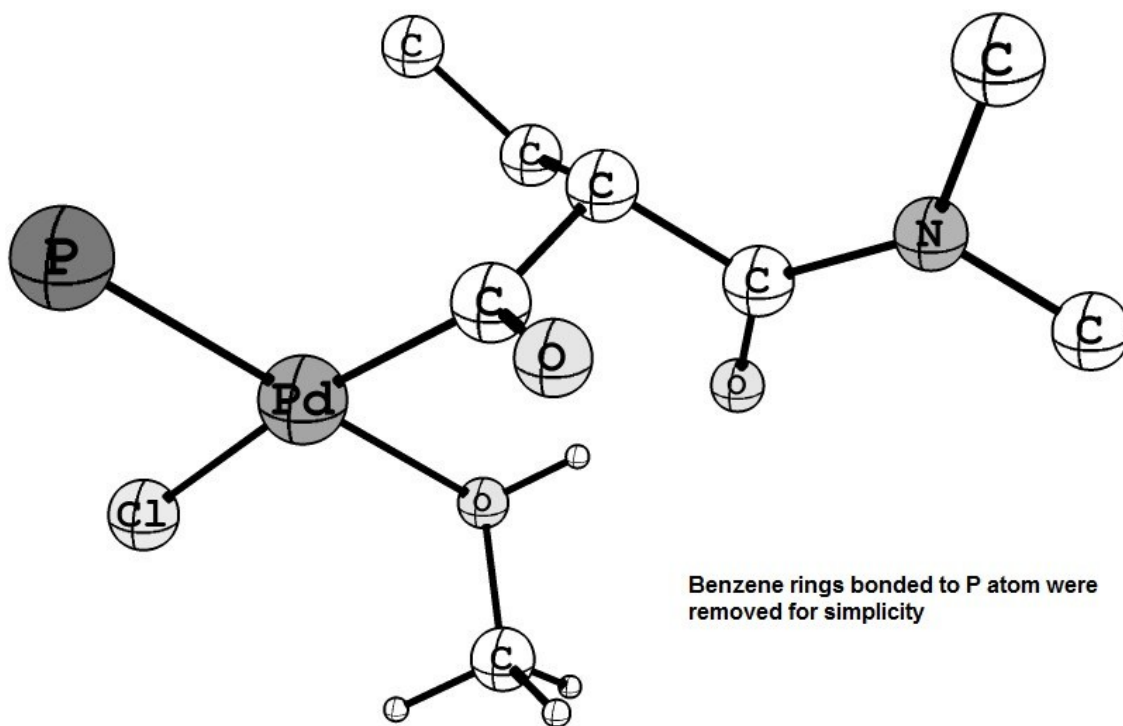

Benzene rings bonded to P atom were removed for simplicity

|    |              |              |              |
|----|--------------|--------------|--------------|
| Pd | -0.328663000 | -1.271484000 | 0.158402000  |
| C  | -2.470000000 | 0.030243000  | 2.215576000  |
| C  | -2.725638000 | 0.489607000  | 0.770752000  |
| C  | -1.335924000 | 0.775056000  | 2.914252000  |
| H  | -0.370917000 | 0.595368000  | 2.421548000  |
| H  | -1.518512000 | 1.861710000  | 2.931795000  |
| H  | -1.235709000 | 0.435470000  | 3.956396000  |
| H  | -3.404235000 | 0.183465000  | 2.780066000  |
| H  | -2.728237000 | 1.586655000  | 0.746214000  |
| C  | -1.688456000 | 0.075130000  | -0.316367000 |
| O  | -1.864239000 | 0.455284000  | -1.451249000 |
| H  | -2.276448000 | -1.052141000 | 2.239297000  |
| Cl | 1.177227000  | -3.153910000 | 0.648705000  |
| P  | 1.345874000  | 0.247452000  | -0.090166000 |
| C  | -4.049481000 | -0.073494000 | 0.259795000  |
| O  | -4.261458000 | -1.296342000 | 0.380815000  |
| N  | -4.933737000 | 0.754226000  | -0.321948000 |
| C  | -6.205792000 | 0.229943000  | -0.806067000 |
| H  | -6.282351000 | -0.827494000 | -0.535342000 |
| H  | -7.040325000 | 0.787565000  | -0.353021000 |
| H  | -6.269428000 | 0.331147000  | -1.901556000 |
| C  | -4.669230000 | 2.174030000  | -0.555929000 |
| H  | -5.442061000 | 2.560281000  | -1.231533000 |
| H  | -4.708217000 | 2.758526000  | 0.376782000  |

|   |              |              |              |
|---|--------------|--------------|--------------|
| H | -3.693738000 | 2.314245000  | -1.039860000 |
| C | 2.261714000  | 0.647840000  | 1.443875000  |
| C | 2.401845000  | -0.342809000 | 2.430249000  |
| C | 2.846742000  | 1.909909000  | 1.640125000  |
| C | 3.112118000  | -0.066757000 | 3.600481000  |
| H | 1.964114000  | -1.330328000 | 2.266349000  |
| C | 3.554845000  | 2.179225000  | 2.814033000  |
| H | 2.749286000  | 2.686045000  | 0.879827000  |
| C | 3.685797000  | 1.193654000  | 3.796961000  |
| H | 3.215291000  | -0.840846000 | 4.364418000  |
| H | 4.004397000  | 3.164043000  | 2.959846000  |
| H | 4.235671000  | 1.408291000  | 4.716280000  |
| C | 0.831786000  | 1.871386000  | -0.764522000 |
| C | 1.022642000  | 2.188581000  | -2.115240000 |
| C | 0.110953000  | 2.756504000  | 0.055801000  |
| C | 0.496244000  | 3.373712000  | -2.640067000 |
| H | 1.575538000  | 1.509597000  | -2.765536000 |
| C | -0.409042000 | 3.938799000  | -0.469041000 |
| H | -0.048033000 | 2.521788000  | 1.108807000  |
| C | -0.221966000 | 4.248407000  | -1.821873000 |
| H | 0.648871000  | 3.610396000  | -3.695500000 |
| H | -0.965043000 | 4.619990000  | 0.179059000  |
| H | -0.633947000 | 5.172194000  | -2.234315000 |
| C | 2.599081000  | -0.360095000 | -1.276296000 |
| C | 3.946554000  | 0.014727000  | -1.174284000 |
| C | 2.184751000  | -1.184116000 | -2.334607000 |
| C | 4.869348000  | -0.429963000 | -2.124951000 |
| H | 4.279799000  | 0.649774000  | -0.351755000 |
| C | 3.108418000  | -1.619195000 | -3.286934000 |
| H | 1.137890000  | -1.486684000 | -2.407279000 |
| C | 4.452176000  | -1.244469000 | -3.182185000 |
| H | 5.918601000  | -0.138997000 | -2.037343000 |
| H | 2.779124000  | -2.258717000 | -4.108937000 |
| H | 5.175906000  | -1.591401000 | -3.923349000 |
| O | -2.046311000 | -2.673147000 | 0.278745000  |
| C | -2.167832000 | -3.530142000 | -0.853982000 |
| H | -2.387908000 | -2.955306000 | -1.769676000 |
| H | -1.212378000 | -4.055487000 | -0.978847000 |
| H | -2.968304000 | -4.269824000 | -0.689182000 |
| H | -2.918866000 | -2.196581000 | 0.404173000  |

## 6H-b

Benzene rings bonded to P atom  
were removed for simplicity

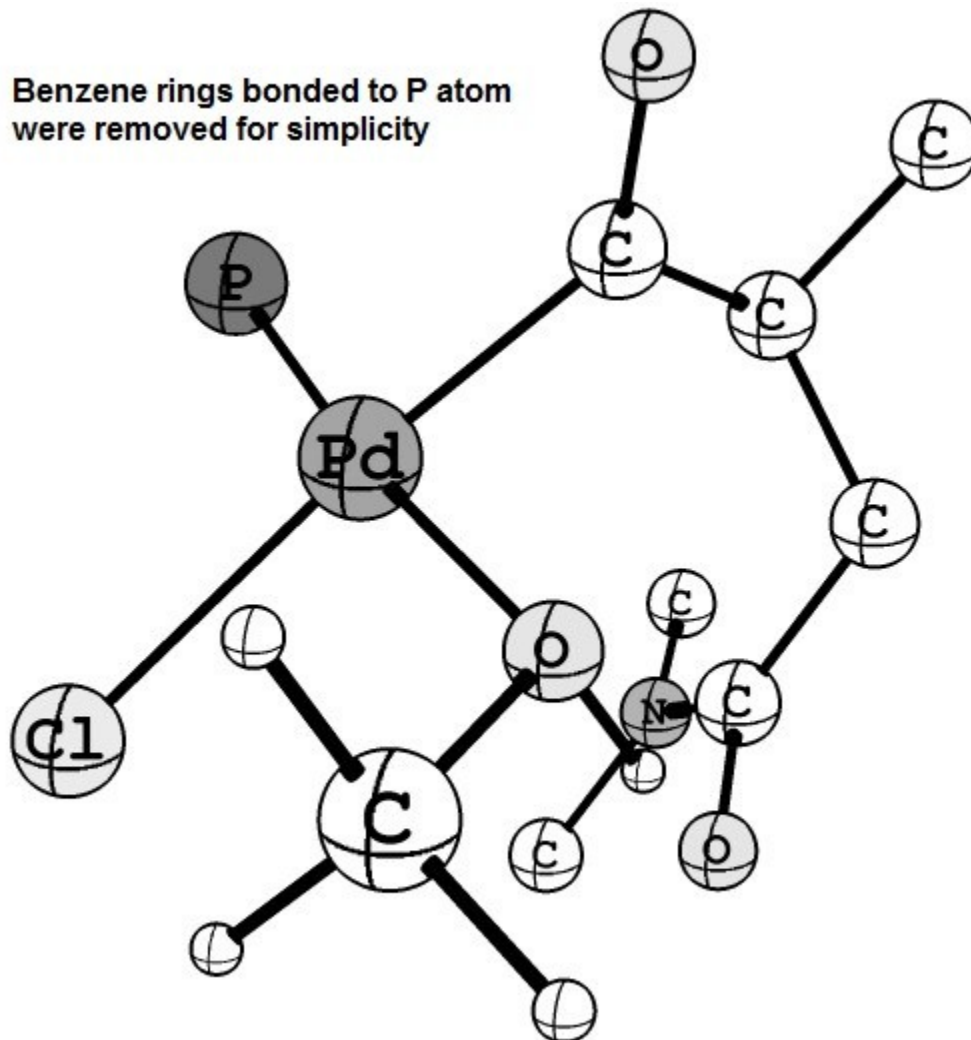

|    |              |              |              |
|----|--------------|--------------|--------------|
| Pd | -0.740748000 | -0.910916000 | -0.757845000 |
| C  | -2.032626000 | 1.795131000  | -1.010895000 |
| C  | -3.423487000 | 1.243745000  | -0.616730000 |
| C  | -2.173750000 | 3.070121000  | -1.842066000 |
| H  | -2.760354000 | 2.879295000  | -2.753200000 |
| H  | -2.682688000 | 3.852216000  | -1.258322000 |
| H  | -1.187316000 | 3.446362000  | -2.145005000 |
| H  | -4.028909000 | 2.093067000  | -0.262722000 |
| H  | -1.476684000 | 2.019256000  | -0.090542000 |
| H  | -3.929348000 | 0.849100000  | -1.508094000 |
| C  | -1.180414000 | 0.744815000  | -1.747397000 |
| O  | -0.858244000 | 0.883830000  | -2.901069000 |
| Cl | -0.422058000 | -3.046711000 | 0.460689000  |
| P  | 1.108889000  | 0.079031000  | 0.128739000  |
| C  | -3.486239000 | 0.139261000  | 0.428175000  |



|   |              |              |              |
|---|--------------|--------------|--------------|
| O | -3.913909000 | -0.991404000 | 0.119034000  |
| N | -3.111715000 | 0.387881000  | 1.699033000  |
| C | -3.150269000 | -0.729328000 | 2.639256000  |
| H | -2.636846000 | -0.432480000 | 3.560570000  |
| H | -4.188476000 | -1.009924000 | 2.878952000  |
| H | -2.644298000 | -1.602919000 | 2.206365000  |
| C | -2.716948000 | 1.685469000  | 2.226244000  |
| H | -3.275883000 | 1.893139000  | 3.151335000  |
| H | -1.640680000 | 1.702329000  | 2.461731000  |
| H | -2.938532000 | 2.488424000  | 1.517159000  |
| C | 1.101612000  | 0.356444000  | 1.937991000  |
| C | 0.312383000  | -0.481487000 | 2.741690000  |
| C | 1.892278000  | 1.349740000  | 2.541967000  |
| C | 0.303598000  | -0.315337000 | 4.128602000  |
| H | -0.271479000 | -1.275867000 | 2.274055000  |
| C | 1.873623000  | 1.514806000  | 3.928862000  |
| H | 2.522481000  | 1.999615000  | 1.933745000  |
| C | 1.075623000  | 0.686475000  | 4.724338000  |
| H | -0.311829000 | -0.972722000 | 4.747121000  |
| H | 2.486739000  | 2.293325000  | 4.388284000  |
| H | 1.059816000  | 0.819627000  | 5.808504000  |
| C | 1.563863000  | 1.699231000  | -0.604723000 |
| C | 2.352802000  | 1.739489000  | -1.765269000 |
| C | 1.019583000  | 2.895907000  | -0.107912000 |
| C | 2.590634000  | 2.951941000  | -2.416036000 |
| H | 2.781201000  | 0.820679000  | -2.167920000 |
| C | 1.262961000  | 4.107098000  | -0.758516000 |
| H | 0.407447000  | 2.892767000  | 0.794948000  |
| C | 2.045745000  | 4.138565000  | -1.916442000 |
| H | 3.206350000  | 2.967824000  | -3.318153000 |
| H | 0.835404000  | 5.029006000  | -0.358395000 |
| H | 2.232704000  | 5.086044000  | -2.426687000 |
| C | 2.565501000  | -0.982941000 | -0.203375000 |
| C | 3.671690000  | -1.008917000 | 0.658142000  |
| C | 2.575380000  | -1.767641000 | -1.367889000 |
| C | 4.776883000  | -1.808402000 | 0.354183000  |
| H | 3.672630000  | -0.413031000 | 1.572183000  |
| C | 3.685615000  | -2.557804000 | -1.672834000 |
| H | 1.707108000  | -1.763033000 | -2.030982000 |
| C | 4.787078000  | -2.581176000 | -0.811074000 |
| H | 5.632210000  | -1.828475000 | 1.033415000  |
| H | 3.686007000  | -3.164054000 | -2.581461000 |
| H | 5.651546000  | -3.206858000 | -1.044906000 |
| O | -2.475173000 | -1.726250000 | -1.886422000 |
| C | -2.459276000 | -3.076481000 | -2.336115000 |
| H | -2.189706000 | -3.767576000 | -1.523249000 |

|   |              |              |              |
|---|--------------|--------------|--------------|
| H | -3.443173000 | -3.346861000 | -2.753643000 |
| H | -1.705485000 | -3.158143000 | -3.132281000 |
| H | -3.196364000 | -1.576301000 | -1.213342000 |

7H-a

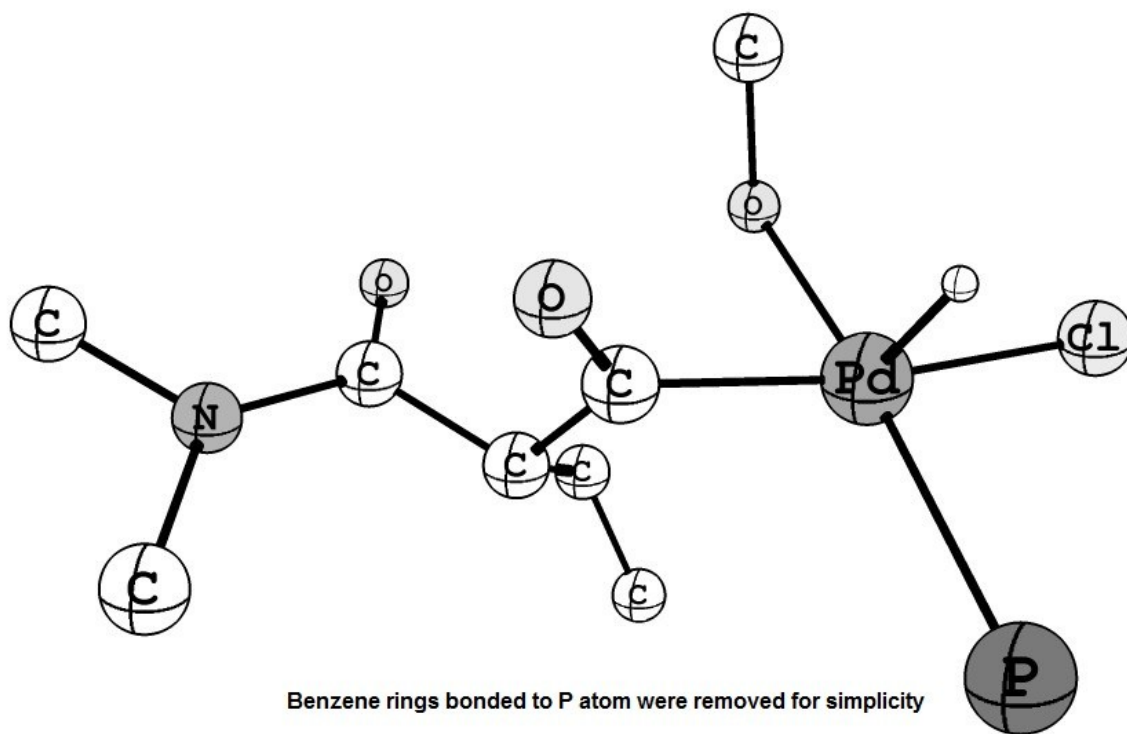

|    |              |              |              |
|----|--------------|--------------|--------------|
| Pd | -0.170240000 | -1.542661000 | -0.134747000 |
| C  | -2.478957000 | -0.725508000 | 2.055152000  |
| C  | -2.684182000 | 0.001621000  | 0.708466000  |
| C  | -1.505343000 | -0.039225000 | 3.012383000  |
| H  | -0.473594000 | -0.000951000 | 2.637429000  |
| H  | -1.816411000 | 0.997954000  | 3.217687000  |
| H  | -1.472067000 | -0.576160000 | 3.972948000  |
| H  | -3.463396000 | -0.786267000 | 2.538994000  |
| H  | -2.372505000 | 1.052103000  | 0.822430000  |
| C  | -1.860739000 | -0.463166000 | -0.508988000 |
| O  | -2.205332000 | -0.236283000 | -1.631772000 |
| H  | -2.191899000 | -1.769088000 | 1.863915000  |
| Cl | 1.625077000  | -3.188524000 | 0.372461000  |
| P  | 1.338020000  | 0.264469000  | -0.079358000 |
| C  | -4.167413000 | -0.080281000 | 0.277757000  |
| O  | -4.789578000 | -1.120184000 | 0.474563000  |
| N  | -4.719219000 | 1.019709000  | -0.294858000 |
| C  | -6.117547000 | 0.982327000  | -0.698724000 |

|   |              |              |              |
|---|--------------|--------------|--------------|
| H | -6.550572000 | 0.027786000  | -0.382918000 |
| H | -6.674785000 | 1.809648000  | -0.230239000 |
| H | -6.210087000 | 1.076919000  | -1.793740000 |
| C | -3.981565000 | 2.246078000  | -0.570453000 |
| H | -4.609205000 | 2.899859000  | -1.188785000 |
| H | -3.725412000 | 2.798361000  | 0.348249000  |
| H | -3.062674000 | 2.042969000  | -1.133021000 |
| C | 2.350405000  | 0.398680000  | 1.438819000  |
| C | 2.180980000  | -0.476370000 | 2.520845000  |
| C | 3.302300000  | 1.430700000  | 1.521440000  |
| C | 2.946685000  | -0.309936000 | 3.679089000  |
| H | 1.471561000  | -1.299848000 | 2.462767000  |
| C | 4.064899000  | 1.589399000  | 2.678131000  |
| H | 3.448882000  | 2.116081000  | 0.685047000  |
| C | 3.885726000  | 0.720351000  | 3.760743000  |
| H | 2.807527000  | -0.994560000 | 4.518454000  |
| H | 4.800743000  | 2.394437000  | 2.734435000  |
| H | 4.482793000  | 0.846559000  | 4.666716000  |
| C | 0.444567000  | 1.854085000  | -0.188125000 |
| C | -0.079494000 | 2.267074000  | -1.425427000 |
| C | 0.201524000  | 2.625635000  | 0.958690000  |
| C | -0.807737000 | 3.453194000  | -1.515625000 |
| H | 0.083956000  | 1.665549000  | -2.321177000 |
| C | -0.543509000 | 3.804601000  | 0.864501000  |
| H | 0.596462000  | 2.313617000  | 1.926155000  |
| C | -1.041507000 | 4.224382000  | -0.371524000 |
| H | -1.201994000 | 3.772296000  | -2.482605000 |
| H | -0.727907000 | 4.398566000  | 1.762021000  |
| H | -1.618068000 | 5.148951000  | -0.444350000 |
| C | 2.527031000  | 0.276116000  | -1.470139000 |
| C | 3.003403000  | 1.484016000  | -2.007712000 |
| C | 3.019509000  | -0.945505000 | -1.957719000 |
| C | 3.959205000  | 1.466094000  | -3.025765000 |
| H | 2.627822000  | 2.441102000  | -1.643625000 |
| C | 3.975518000  | -0.953652000 | -2.976249000 |
| H | 2.667409000  | -1.883513000 | -1.523772000 |
| C | 4.445455000  | 0.248827000  | -3.512579000 |
| H | 4.322301000  | 2.408912000  | -3.440589000 |
| H | 4.354218000  | -1.906988000 | -3.351533000 |
| H | 5.190756000  | 0.238452000  | -4.311141000 |
| O | -1.635405000 | -2.942192000 | -0.199790000 |
| C | -2.042962000 | -3.480283000 | -1.419203000 |
| H | -2.396490000 | -2.712672000 | -2.139133000 |
| H | -1.247816000 | -4.066907000 | -1.925495000 |
| H | -2.893583000 | -4.168022000 | -1.241064000 |
| H | 0.088015000  | -1.429098000 | -1.593870000 |

## 7H-b

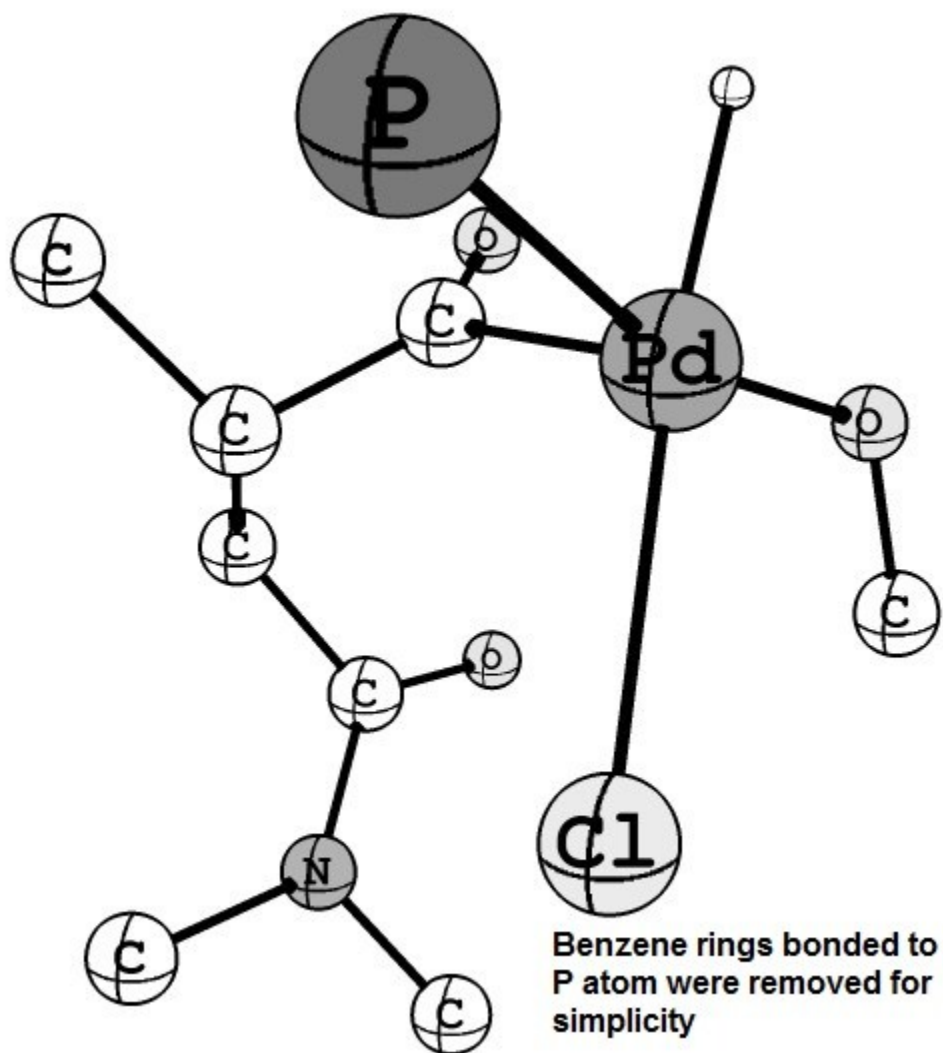

|    |              |              |              |
|----|--------------|--------------|--------------|
| Pd | -0.431989000 | -1.020059000 | -1.011008000 |
| C  | -1.792203000 | 1.610055000  | -0.630321000 |
| C  | -3.309874000 | 1.877136000  | -0.681463000 |
| C  | -0.995357000 | 2.900061000  | -0.875390000 |
| H  | -1.337430000 | 3.392908000  | -1.796709000 |
| H  | -1.141914000 | 3.580882000  | -0.024841000 |
| H  | 0.080379000  | 2.704970000  | -0.965634000 |
| H  | -3.516139000 | 2.738182000  | -0.031388000 |
| H  | -1.525560000 | 1.180371000  | 0.338197000  |
| H  | -3.591653000 | 2.157193000  | -1.704883000 |
| C  | -1.399999000 | 0.624226000  | -1.731673000 |
| O  | -1.604062000 | 0.756232000  | -2.886177000 |
| Cl | -1.542082000 | -1.515938000 | 1.143051000  |

|   |              |              |              |
|---|--------------|--------------|--------------|
| P | 1.402599000  | -0.007705000 | 0.081461000  |
| C | -4.156202000 | 0.664566000  | -0.318745000 |
| O | -4.586428000 | -0.056668000 | -1.221685000 |
| N | -4.407724000 | 0.418009000  | 0.994066000  |
| C | -5.137170000 | -0.788665000 | 1.350290000  |
| H | -4.432198000 | -1.588093000 | 1.635313000  |
| H | -5.804708000 | -0.579062000 | 2.199941000  |
| H | -5.726230000 | -1.123498000 | 0.490179000  |
| C | -3.790673000 | 1.106999000  | 2.113971000  |
| H | -4.557525000 | 1.372572000  | 2.859180000  |
| H | -3.043723000 | 0.453429000  | 2.593321000  |
| H | -3.288770000 | 2.027325000  | 1.801735000  |
| C | 1.143767000  | 1.375432000  | 1.248989000  |
| C | 0.153729000  | 1.264882000  | 2.241070000  |
| C | 1.895460000  | 2.556782000  | 1.146928000  |
| C | -0.084376000 | 2.329933000  | 3.110527000  |
| H | -0.433814000 | 0.347837000  | 2.314103000  |
| C | 1.650547000  | 3.618574000  | 2.021433000  |
| H | 2.665329000  | 2.657647000  | 0.381725000  |
| C | 0.659127000  | 3.510110000  | 3.000255000  |
| H | -0.858421000 | 2.237639000  | 3.875674000  |
| H | 2.236684000  | 4.535656000  | 1.931829000  |
| H | 0.465974000  | 4.344471000  | 3.678199000  |
| C | 2.723364000  | 0.569723000  | -1.040281000 |
| C | 4.069370000  | 0.477412000  | -0.649901000 |
| C | 2.396789000  | 1.160881000  | -2.270279000 |
| C | 5.074112000  | 0.972332000  | -1.483614000 |
| H | 4.333045000  | 0.019138000  | 0.304983000  |
| C | 3.404925000  | 1.661210000  | -3.097619000 |
| H | 1.356729000  | 1.228145000  | -2.592363000 |
| C | 4.743718000  | 1.565757000  | -2.706394000 |
| H | 6.119190000  | 0.892810000  | -1.176605000 |
| H | 3.142137000  | 2.119379000  | -4.053318000 |
| H | 5.531939000  | 1.950511000  | -3.357302000 |
| C | 2.160972000  | -1.365188000 | 1.041360000  |
| C | 2.434808000  | -1.251175000 | 2.410912000  |
| C | 2.457111000  | -2.563872000 | 0.367705000  |
| C | 2.998461000  | -2.328543000 | 3.101265000  |
| H | 2.211738000  | -0.325339000 | 2.941892000  |
| C | 3.021774000  | -3.633792000 | 1.061991000  |
| H | 2.253330000  | -2.664394000 | -0.701198000 |
| C | 3.290526000  | -3.519019000 | 2.430944000  |
| H | 3.210182000  | -2.233092000 | 4.168489000  |
| H | 3.250239000  | -4.561629000 | 0.533184000  |
| H | 3.728568000  | -4.359404000 | 2.974026000  |
| H | 0.420733000  | -0.859901000 | -2.263573000 |

|   |              |              |              |
|---|--------------|--------------|--------------|
| O | -1.573623000 | -2.214200000 | -2.161136000 |
| C | -2.711307000 | -2.827874000 | -1.629111000 |
| H | -3.132637000 | -3.497937000 | -2.408190000 |
| H | -2.508039000 | -3.453066000 | -0.737096000 |
| H | -3.500954000 | -2.103023000 | -1.359852000 |

**Branch (*alpha*) ester**

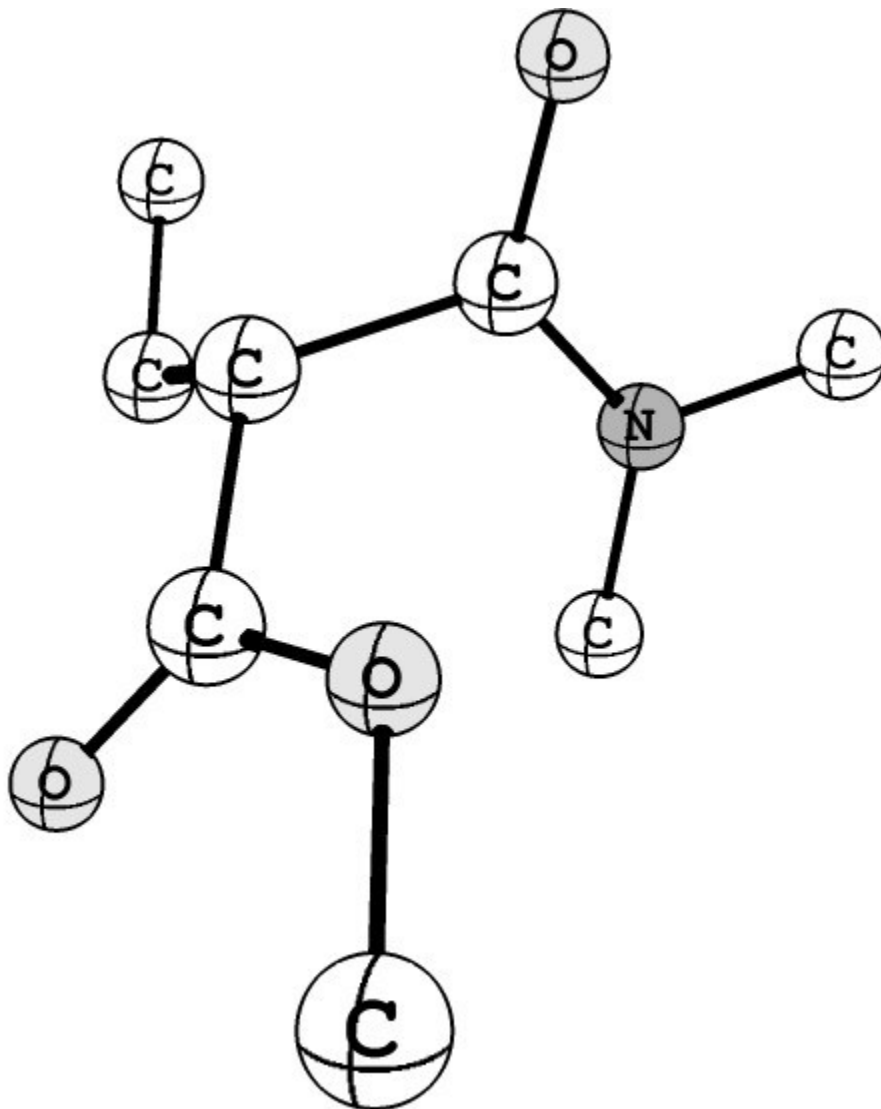

|   |              |             |              |
|---|--------------|-------------|--------------|
| C | -0.750609000 | 1.948707000 | 0.513501000  |
| C | -0.073660000 | 0.924494000 | -0.411643000 |
| C | -2.151452000 | 2.341892000 | 0.050992000  |
| H | -2.135858000 | 2.743547000 | -0.974976000 |
| H | -2.839799000 | 1.482384000 | 0.059472000  |

|   |              |              |              |
|---|--------------|--------------|--------------|
| H | -2.573956000 | 3.114554000  | 0.711183000  |
| C | -0.911986000 | -0.345368000 | -0.632903000 |
| O | -1.520125000 | -0.478093000 | -1.692237000 |
| N | -1.013925000 | -1.248876000 | 0.384506000  |
| C | -1.812653000 | -2.447522000 | 0.183230000  |
| H | -2.384407000 | -2.342445000 | -0.744105000 |
| H | -1.167077000 | -3.340594000 | 0.111542000  |
| H | -2.501798000 | -2.588767000 | 1.031293000  |
| C | -0.229769000 | -1.240200000 | 1.606111000  |
| H | 0.590084000  | -1.978057000 | 1.557844000  |
| H | 0.201045000  | -0.257077000 | 1.812846000  |
| H | -0.875147000 | -1.501385000 | 2.459230000  |
| H | -0.028021000 | 1.358805000  | -1.423801000 |
| H | -0.793867000 | 1.556695000  | 1.542200000  |
| C | 1.377191000  | 0.665799000  | -0.040446000 |
| O | 2.041338000  | 1.350232000  | 0.703799000  |
| O | 1.853803000  | -0.412951000 | -0.674746000 |
| H | -0.099598000 | 2.835116000  | 0.555350000  |
| C | 3.222451000  | -0.757180000 | -0.429065000 |
| H | 3.418331000  | -1.661336000 | -1.016168000 |
| H | 3.888497000  | 0.057480000  | -0.747571000 |
| H | 3.381835000  | -0.954020000 | 0.640939000  |

Linear (*beta*) ester

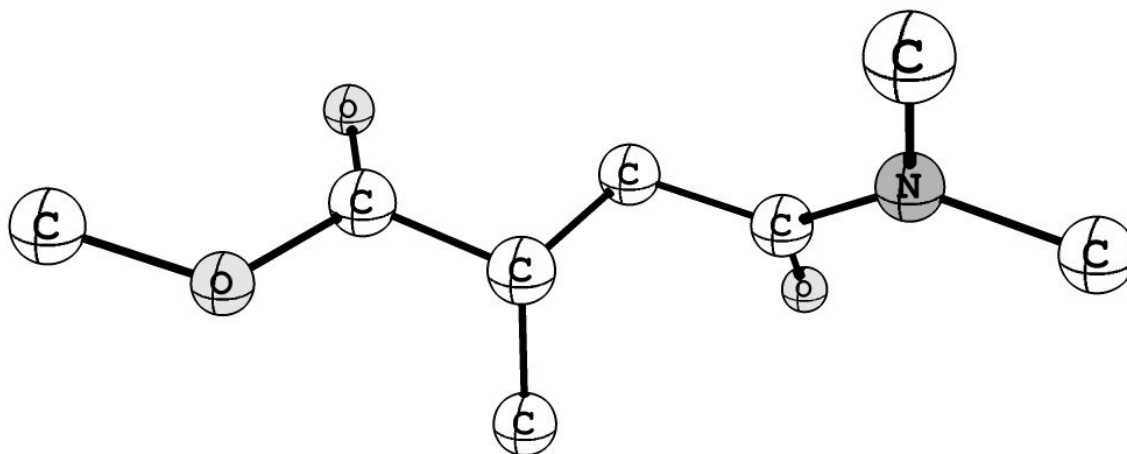

|   |              |              |              |
|---|--------------|--------------|--------------|
| C | 0.617361000  | -0.235552000 | -0.247523000 |
| C | -0.379131000 | -0.328490000 | 0.919690000  |
| C | 0.630368000  | -1.500463000 | -1.121500000 |
| H | 0.938611000  | -2.377222000 | -0.530237000 |
| H | -0.372800000 | -1.702116000 | -1.522135000 |
| H | 1.328103000  | -1.383806000 | -1.961703000 |
| C | -1.810401000 | -0.528990000 | 0.440835000  |
| O | -2.301790000 | -1.658081000 | 0.436823000  |
| N | -2.498704000 | 0.561492000  | -0.011911000 |
| C | -3.835437000 | 0.385422000  | -0.554502000 |
| H | -4.121815000 | -0.666470000 | -0.455966000 |
| H | -4.557784000 | 1.016986000  | -0.010558000 |
| H | -3.863356000 | 0.673939000  | -1.619633000 |
| C | -1.987395000 | 1.918840000  | -0.075016000 |
| H | -2.727612000 | 2.615155000  | 0.352086000  |
| H | -1.058334000 | 2.029846000  | 0.491452000  |
| H | -1.800460000 | 2.226285000  | -1.119251000 |
| H | -0.137466000 | -1.207811000 | 1.530991000  |
| H | 0.356583000  | 0.618300000  | -0.894984000 |
| H | -0.277537000 | 0.551978000  | 1.568145000  |
| C | 2.012829000  | 0.055547000  | 0.281003000  |
| O | 2.337606000  | 0.053440000  | 1.447209000  |
| C | 4.225962000  | 0.577543000  | -0.352519000 |
| H | 4.287594000  | 1.461739000  | 0.298688000  |
| H | 4.659017000  | -0.284113000 | 0.176209000  |
| H | 4.765300000  | 0.758044000  | -1.289403000 |
| O | 2.867678000  | 0.314101000  | -0.718174000 |



**Table S1.** DFT/B3LYP-D3-PCM/Def2-TZVP computed total electronic energies ( $E_{\text{tot}}$ , au), zero-point energies (ZPE, kcal/mol) and Gibbs free energies ( $G_{\text{tot}}$ , 383.15K, au) in methanol for the hydride cycle

| Compound                                               | $E_{\text{tot}}$ (solv+D3) | ZPE       | $G_{\text{tot}}$ (solv+D3) |
|--------------------------------------------------------|----------------------------|-----------|----------------------------|
| <i>Starting materials</i>                              |                            |           |                            |
| $\alpha,\beta$ -Unsaturated Amide                      | -365.4071898               | 102.23683 | -365.277156                |
| PPh <sub>3</sub>                                       | -1036.670897               | 170.52590 | -1036.441507               |
| CH <sub>3</sub> OH                                     | -115.7833535               | 31.79668  | -115.755364                |
| CO                                                     | -113.3638545               | 3.09871   | -113.378042                |
| <i>Amide coordination and insertion</i>                |                            |           |                            |
| 1H                                                     | -2662.290851               | 349.23193 | -2661.801175               |
| 2H                                                     | -1990.992956               | 281.36307 | -1990.599278               |
| TSH23-a                                                | -1990.987099               | 280.92827 | -1990.596960               |
| TSH23-b                                                | -1990.98461                | 279.56357 | -1990.593541               |
| 3H-a                                                   | -1991.019867               | 283.63598 | -1990.626369               |
| 3H-b                                                   | -1991.025556               | 283.84569 | -1990.631583               |
| <i>CO coordination and insertion</i>                   |                            |           |                            |
| 4H-a                                                   | -2104.404766               | 288.50923 | -2104.006738               |
| 4H-b                                                   | -2104.396434               | 288.66063 | -2103.997987               |
| TSH45-a                                                | -2104.379262               | 288.57485 | -2103.977854               |
| TSH45-b                                                | -2104.377182               | 288.98354 | -2103.972389               |
| 5H-a                                                   | -2104.421835               | 290.22099 | -2104.020645               |
| 5H-b                                                   | -2104.420317               | 290.09619 | -2104.019066               |
| <i>Coordination and oxidative addition of methanol</i> |                            |           |                            |
| 6H-a                                                   | -2220.214878               | 323.97592 | -2219.763532               |
| 6H-b                                                   | -2220.220087               | 324.54799 | -2219.766202               |
| 7H-a                                                   | -2220.125194               | 321.74131 | -2219.676082               |
| 7H-b                                                   | -2220.1337432              | 321.29208 | -2219.686609               |
| <i>Final Products</i>                                  |                            |           |                            |
| Branch alpha ester (AP)                                | -594.6205144               | 144.16850 | -594.429573                |
| Linear beta ester (BP)                                 | -594.6234938               | 144.23197 | -594.433382                |

S2. Cartesian coordinates (in Å) of all the B3LYP-D3/ Def2-SVP optimized structures of reactants, intermediates and products in the alkoxy cycle in Methanol phase.

1A

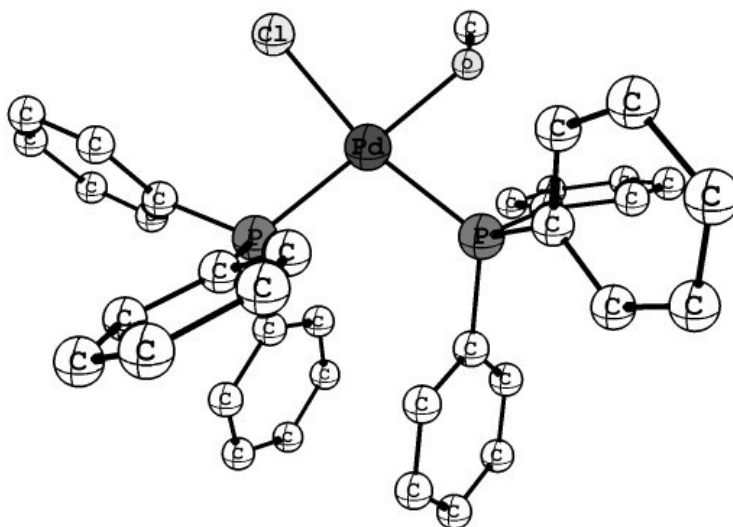

|    |              |              |              |
|----|--------------|--------------|--------------|
| Pd | -0.016176000 | -1.477976000 | 0.166095000  |
| Cl | -1.520721000 | -3.336251000 | 0.290774000  |
| P  | 1.762311000  | -0.018509000 | -0.014767000 |
| P  | -1.826855000 | -0.036298000 | 0.049393000  |
| O  | 1.576864000  | -2.748703000 | 0.009834000  |
| C  | 1.797787000  | -3.639048000 | 1.052429000  |
| H  | 2.692515000  | -4.255992000 | 0.821452000  |
| H  | 2.011580000  | -3.137825000 | 2.020703000  |
| H  | 0.952532000  | -4.335403000 | 1.223309000  |
| C  | -3.451835000 | -0.722878000 | 0.556828000  |
| C  | -4.212561000 | -1.484407000 | -0.344623000 |
| C  | -3.914974000 | -0.545435000 | 1.868358000  |
| C  | -5.426168000 | -2.043137000 | 0.057036000  |
| H  | -3.857889000 | -1.641057000 | -1.363949000 |
| C  | -5.125800000 | -1.116592000 | 2.271060000  |
| H  | -3.334405000 | 0.042239000  | 2.581045000  |
| C  | -5.885390000 | -1.863189000 | 1.366550000  |
| H  | -6.013836000 | -2.627318000 | -0.654926000 |
| H  | -5.477573000 | -0.970152000 | 3.294894000  |
| H  | -6.834754000 | -2.303790000 | 1.679768000  |
| C  | -1.719650000 | 1.473799000  | 1.083551000  |
| C  | -2.443319000 | 2.639640000  | 0.794136000  |
| C  | -0.928350000 | 1.423771000  | 2.239405000  |
| C  | -2.367756000 | 3.740953000  | 1.647064000  |
| H  | -3.055096000 | 2.703197000  | -0.105202000 |

|   |              |              |              |
|---|--------------|--------------|--------------|
| C | -0.853486000 | 2.527071000  | 3.091623000  |
| H | -0.362016000 | 0.518426000  | 2.466329000  |
| C | -1.571726000 | 3.688142000  | 2.795579000  |
| H | -2.926462000 | 4.648620000  | 1.408090000  |
| H | -0.222862000 | 2.481568000  | 3.981940000  |
| H | -1.505603000 | 4.555584000  | 3.456129000  |
| C | -2.105962000 | 0.496559000  | -1.683944000 |
| C | -1.096694000 | 0.277260000  | -2.635357000 |
| C | -3.304159000 | 1.110928000  | -2.090095000 |
| C | -1.263327000 | 0.696306000  | -3.957751000 |
| H | -0.176256000 | -0.229836000 | -2.347656000 |
| C | -3.468743000 | 1.528561000  | -3.411961000 |
| H | -4.121303000 | 1.247901000  | -1.380414000 |
| C | -2.446735000 | 1.328768000  | -4.346819000 |
| H | -0.465247000 | 0.519958000  | -4.682181000 |
| H | -4.402543000 | 2.007703000  | -3.714313000 |
| H | -2.579641000 | 1.656336000  | -5.380394000 |
| C | 3.079280000  | -0.532315000 | 1.137961000  |
| C | 4.413378000  | -0.659193000 | 0.729418000  |
| C | 2.740192000  | -0.755816000 | 2.481376000  |
| C | 5.398330000  | -1.004325000 | 1.659064000  |
| H | 4.684709000  | -0.490325000 | -0.314037000 |
| C | 3.729177000  | -1.085587000 | 3.410287000  |
| H | 1.698748000  | -0.675521000 | 2.801243000  |
| C | 5.060218000  | -1.212721000 | 3.000108000  |
| H | 6.436073000  | -1.106865000 | 1.333389000  |
| H | 3.456969000  | -1.253855000 | 4.454640000  |
| H | 5.833364000  | -1.477988000 | 3.724798000  |
| C | 1.625195000  | 1.785769000  | 0.290186000  |
| C | 0.752780000  | 2.548231000  | -0.503201000 |
| C | 2.374136000  | 2.425430000  | 1.288823000  |
| C | 0.625664000  | 3.920049000  | -0.296699000 |
| H | 0.166882000  | 2.071626000  | -1.289025000 |
| C | 2.245770000  | 3.802237000  | 1.492776000  |
| H | 3.060796000  | 1.854319000  | 1.912614000  |
| C | 1.370059000  | 4.551501000  | 0.705009000  |
| H | -0.067084000 | 4.495908000  | -0.913588000 |
| H | 2.833022000  | 4.287623000  | 2.275561000  |
| H | 1.263624000  | 5.625766000  | 0.871570000  |
| C | 2.474591000  | -0.092693000 | -1.706723000 |
| C | 3.111080000  | 1.024247000  | -2.271999000 |
| C | 2.366437000  | -1.279284000 | -2.453578000 |
| C | 3.619177000  | 0.960354000  | -3.572506000 |
| H | 3.208521000  | 1.948890000  | -1.702638000 |
| C | 2.871849000  | -1.333328000 | -3.753969000 |
| H | 1.902646000  | -2.153165000 | -1.994059000 |

|   |             |              |              |
|---|-------------|--------------|--------------|
| C | 3.494369000 | -0.214742000 | -4.318561000 |
| H | 4.110440000 | 1.835790000  | -4.003307000 |
| H | 2.778458000 | -2.256785000 | -4.330284000 |
| H | 3.884293000 | -0.259976000 | -5.338144000 |

2A

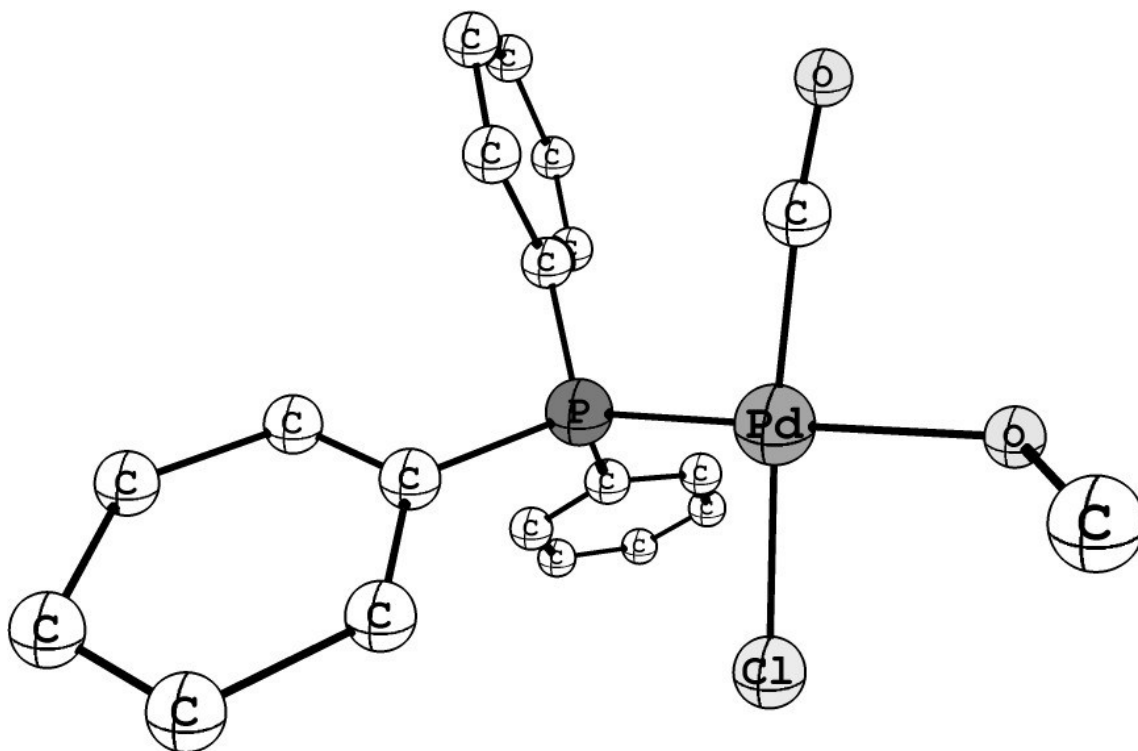

|    |              |              |              |
|----|--------------|--------------|--------------|
| Pd | 1.851422000  | 0.129977000  | -0.202835000 |
| Cl | 1.969397000  | -2.222570000 | -0.127160000 |
| P  | -0.465596000 | -0.025259000 | 0.021330000  |
| O  | 3.861180000  | 0.271691000  | -0.513605000 |
| C  | 4.623281000  | 0.015532000  | 0.625623000  |
| H  | 5.698927000  | 0.035245000  | 0.351316000  |
| H  | 4.489888000  | 0.773028000  | 1.429791000  |
| H  | 4.423569000  | -0.980107000 | 1.074456000  |
| C  | 1.953505000  | 2.027947000  | -0.239698000 |
| O  | 2.121829000  | 3.150041000  | -0.276565000 |
| C  | -1.039752000 | -0.554967000 | 1.671944000  |
| C  | -0.247364000 | -1.416779000 | 2.447354000  |
| C  | -2.291271000 | -0.134334000 | 2.154348000  |
| C  | -0.706192000 | -1.850783000 | 3.693344000  |
| H  | 0.715821000  | -1.756152000 | 2.063208000  |
| C  | -2.743664000 | -0.575317000 | 3.399518000  |

|   |              |              |              |
|---|--------------|--------------|--------------|
| H | -2.912937000 | 0.537058000  | 1.560104000  |
| C | -1.951605000 | -1.431668000 | 4.171113000  |
| H | -0.085377000 | -2.519545000 | 4.293686000  |
| H | -3.717963000 | -0.246683000 | 3.767892000  |
| H | -2.306063000 | -1.771446000 | 5.146984000  |
| C | -1.308223000 | 1.574999000  | -0.261018000 |
| C | -2.113512000 | 1.802814000  | -1.385097000 |
| C | -1.095115000 | 2.613126000  | 0.662989000  |
| C | -2.697221000 | 3.058743000  | -1.582861000 |
| H | -2.289863000 | 1.004420000  | -2.106863000 |
| C | -1.682684000 | 3.861498000  | 0.463359000  |
| H | -0.474147000 | 2.444311000  | 1.546422000  |
| C | -2.483547000 | 4.087515000  | -0.662750000 |
| H | -3.323637000 | 3.229138000  | -2.461199000 |
| H | -1.514646000 | 4.661323000  | 1.187784000  |
| H | -2.941041000 | 5.066768000  | -0.820144000 |
| C | -1.190185000 | -1.174165000 | -1.193477000 |
| C | -0.642285000 | -1.217262000 | -2.485880000 |
| C | -2.293213000 | -1.978324000 | -0.875035000 |
| C | -1.203272000 | -2.050743000 | -3.454133000 |
| H | 0.226074000  | -0.602074000 | -2.731538000 |
| C | -2.845981000 | -2.817299000 | -1.846796000 |
| H | -2.720252000 | -1.953998000 | 0.128587000  |
| C | -2.304592000 | -2.853121000 | -3.135000000 |
| H | -0.774961000 | -2.079917000 | -4.458359000 |
| H | -3.702925000 | -3.445481000 | -1.593814000 |
| H | -2.738427000 | -3.510566000 | -3.891841000 |

2A-t

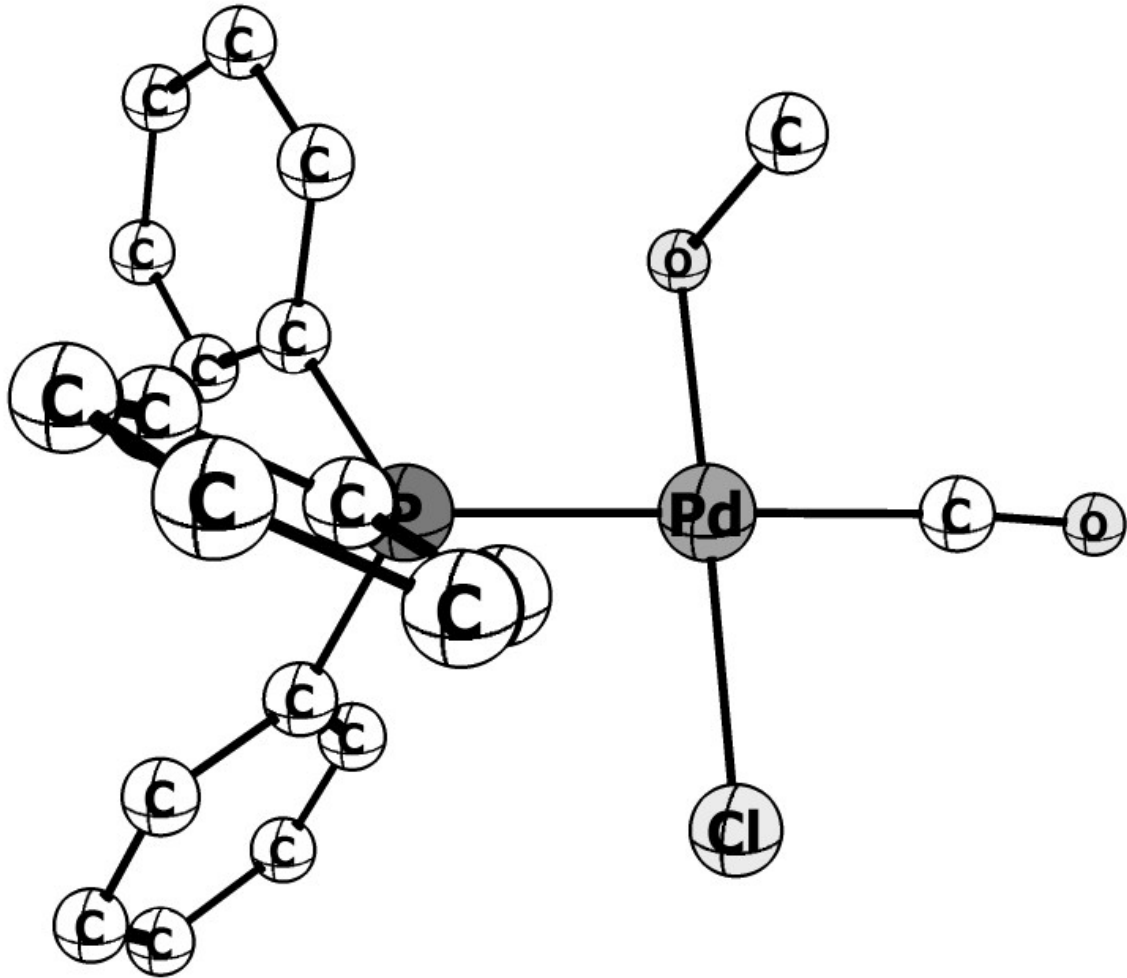

|    |              |              |              |
|----|--------------|--------------|--------------|
| Pd | -1.856096000 | 0.018418000  | 0.298976000  |
| Cl | -2.046216000 | -2.247908000 | -0.378682000 |
| P  | 0.460805000  | -0.018366000 | 0.007550000  |
| C  | 0.893513000  | 0.260607000  | -1.732338000 |
| C  | -0.000886000 | -0.128908000 | -2.731820000 |
| C  | 2.121827000  | 0.823824000  | -2.088851000 |
| C  | 0.331279000  | 0.042206000  | -4.069500000 |
| H  | -0.950229000 | -0.570468000 | -2.462397000 |
| C  | 2.448584000  | 0.993406000  | -3.427492000 |
| H  | 2.820714000  | 1.132013000  | -1.323961000 |
| C  | 1.554270000  | 0.604038000  | -4.419190000 |
| H  | -0.367958000 | -0.259763000 | -4.837961000 |
| H  | 3.401521000  | 1.430430000  | -3.695130000 |
| H  | 1.809582000  | 0.740531000  | -5.461861000 |
| C  | 1.362874000  | 1.251196000  | 0.937095000  |
| C  | 2.163523000  | 0.923266000  | 2.031063000  |
| C  | 1.218852000  | 2.592966000  | 0.569285000  |
| C  | 2.814366000  | 1.922702000  | 2.746262000  |

|   |              |              |              |
|---|--------------|--------------|--------------|
| H | 2.288561000  | -0.108599000 | 2.324918000  |
| C | 1.876084000  | 3.585236000  | 1.280101000  |
| H | 0.603032000  | 2.859558000  | -0.276211000 |
| C | 2.672237000  | 3.253143000  | 2.373124000  |
| H | 3.436053000  | 1.656885000  | 3.591077000  |
| H | 1.763951000  | 4.619934000  | 0.983815000  |
| H | 3.181419000  | 4.029934000  | 2.928548000  |
| C | 1.215169000  | -1.595311000 | 0.490555000  |
| C | 0.780122000  | -2.206774000 | 1.668783000  |
| C | 2.225730000  | -2.190793000 | -0.262301000 |
| C | 1.363403000  | -3.389752000 | 2.097762000  |
| H | -0.021158000 | -1.760860000 | 2.243325000  |
| C | 2.800238000  | -3.382851000 | 0.164886000  |
| H | 2.562998000  | -1.733007000 | -1.181418000 |
| C | 2.373934000  | -3.980805000 | 1.344787000  |
| H | 1.022881000  | -3.856013000 | 3.012787000  |
| H | 3.581017000  | -3.842613000 | -0.426607000 |
| H | 2.822907000  | -4.908452000 | 1.674806000  |
| C | -3.833616000 | 0.043679000  | 0.520114000  |
| O | -4.950817000 | -0.020490000 | 0.647167000  |
| O | -1.648838000 | 1.931469000  | 0.844015000  |
| C | -2.194273000 | 2.840446000  | -0.072832000 |
| H | -3.283949000 | 2.740055000  | -0.188526000 |
| H | -1.992728000 | 3.854542000  | 0.295680000  |
| H | -1.750759000 | 2.761624000  | -1.075816000 |

TSA23

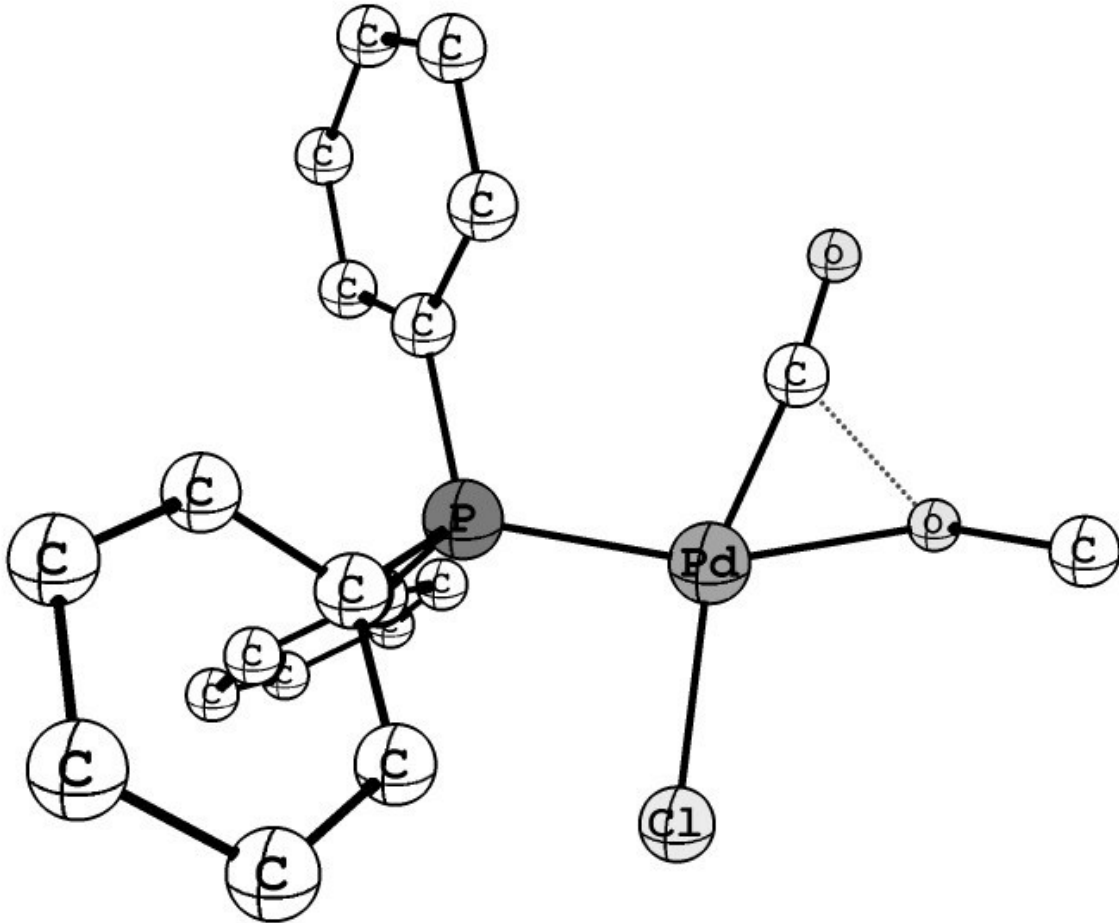

|    |              |              |              |
|----|--------------|--------------|--------------|
| Pd | 1.749025000  | -0.445862000 | -0.092356000 |
| Cl | 1.352518000  | -2.784577000 | 0.021931000  |
| P  | -0.469745000 | 0.045027000  | 0.017593000  |
| O  | 3.874005000  | -0.202108000 | -0.364769000 |
| C  | 4.676330000  | -0.358783000 | 0.787232000  |
| H  | 4.409649000  | 0.352174000  | 1.592663000  |
| H  | 4.595726000  | -1.380129000 | 1.202122000  |
| H  | 5.733741000  | -0.176931000 | 0.519762000  |
| C  | 2.628334000  | 1.228963000  | -0.233979000 |
| O  | 3.022674000  | 2.308883000  | -0.294632000 |
| C  | -1.307915000 | -0.361776000 | 1.588489000  |
| C  | -0.963560000 | -1.531173000 | 2.286192000  |
| C  | -2.334410000 | 0.465443000  | 2.075510000  |
| C  | -1.644669000 | -1.866869000 | 3.458191000  |
| H  | -0.172688000 | -2.176563000 | 1.899666000  |
| C  | -3.010385000 | 0.121335000  | 3.248162000  |
| H  | -2.609886000 | 1.375673000  | 1.541343000  |
| C  | -2.666508000 | -1.043256000 | 3.941345000  |



|   |              |              |              |
|---|--------------|--------------|--------------|
| H | -1.373363000 | -2.777344000 | 3.997281000  |
| H | -3.808521000 | 0.767347000  | 3.620393000  |
| H | -3.195234000 | -1.308446000 | 4.859784000  |
| C | -0.771674000 | 1.832191000  | -0.214896000 |
| C | -1.573893000 | 2.322293000  | -1.254113000 |
| C | -0.178957000 | 2.728715000  | 0.690823000  |
| C | -1.778148000 | 3.699974000  | -1.386303000 |
| H | -2.042497000 | 1.634536000  | -1.959018000 |
| C | -0.391779000 | 4.099772000  | 0.558783000  |
| H | 0.446773000  | 2.353534000  | 1.504328000  |
| C | -1.190183000 | 4.588207000  | -0.482941000 |
| H | -2.402688000 | 4.076694000  | -2.199249000 |
| H | 0.069505000  | 4.790610000  | 1.267808000  |
| H | -1.352266000 | 5.663222000  | -0.588474000 |
| C | -1.394373000 | -0.792676000 | -1.308259000 |
| C | -0.811602000 | -0.867313000 | -2.584461000 |
| C | -2.670070000 | -1.330756000 | -1.088956000 |
| C | -1.508158000 | -1.464759000 | -3.635092000 |
| H | 0.187367000  | -0.457979000 | -2.753112000 |
| C | -3.359929000 | -1.934388000 | -2.144393000 |
| H | -3.125553000 | -1.281187000 | -0.098685000 |
| C | -2.782656000 | -2.000273000 | -3.415589000 |
| H | -1.052765000 | -1.518451000 | -4.626289000 |
| H | -4.352771000 | -2.354858000 | -1.970208000 |
| H | -3.324496000 | -2.473261000 | -4.237714000 |

## 3A

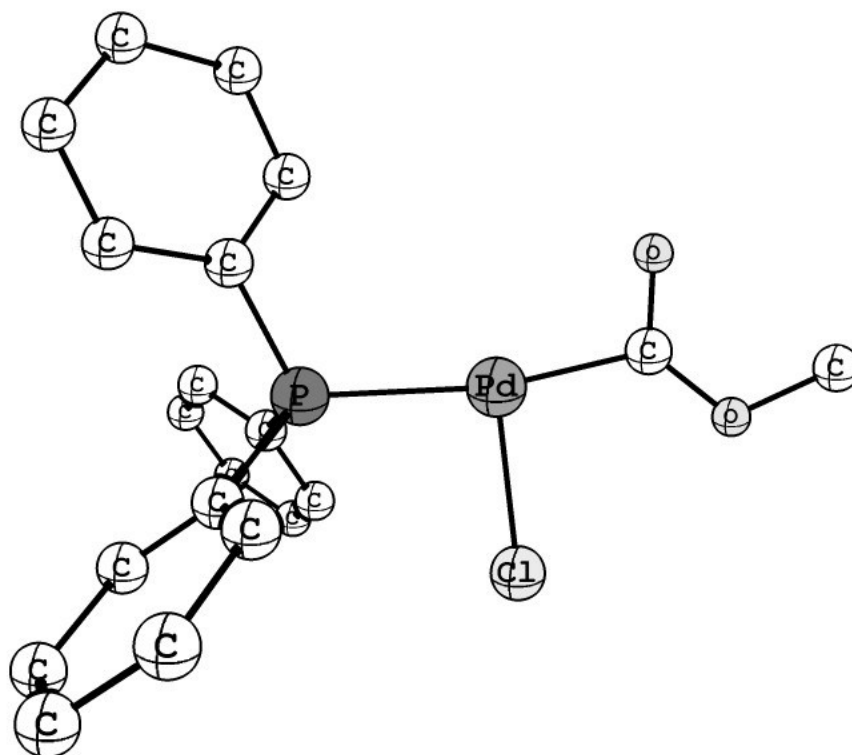

|    |              |              |              |
|----|--------------|--------------|--------------|
| Pd | 1.736917000  | -0.181034000 | 0.015129000  |
| Cl | 1.997373000  | 2.139247000  | 0.033716000  |
| P  | -0.705523000 | -0.078121000 | 0.002454000  |
| C  | 3.634151000  | -0.619966000 | 0.023086000  |
| O  | 3.699821000  | -1.836697000 | 0.017947000  |
| O  | 4.663427000  | 0.202249000  | 0.032527000  |
| C  | 5.976666000  | -0.399285000 | 0.039656000  |
| H  | 6.688761000  | 0.432958000  | 0.046385000  |
| H  | 6.103550000  | -1.021449000 | 0.936843000  |
| H  | 6.115573000  | -1.017304000 | -0.858595000 |
| C  | -1.486448000 | -1.692644000 | -0.366305000 |
| C  | -0.889703000 | -2.841384000 | 0.180690000  |
| C  | -2.637362000 | -1.822780000 | -1.157720000 |
| C  | -1.445122000 | -4.101581000 | -0.049159000 |
| H  | 0.013409000  | -2.745450000 | 0.790301000  |
| C  | -3.187395000 | -3.086509000 | -1.391416000 |
| H  | -3.104989000 | -0.936786000 | -1.590874000 |
| C  | -2.595007000 | -4.225429000 | -0.836883000 |
| H  | -0.976458000 | -4.989189000 | 0.381866000  |
| H  | -4.083472000 | -3.180958000 | -2.009179000 |
| H  | -3.027087000 | -5.211582000 | -1.022000000 |
| C  | -1.401950000 | 1.065079000  | -1.243484000 |
| C  | -2.551460000 | 1.832974000  | -1.008852000 |
| C  | -0.750279000 | 1.152524000  | -2.484481000 |

|   |              |              |              |
|---|--------------|--------------|--------------|
| C | -3.047559000 | 2.674226000  | -2.009439000 |
| H | -3.059567000 | 1.775031000  | -0.044534000 |
| C | -1.252192000 | 1.987739000  | -3.483927000 |
| H | 0.154869000  | 0.565969000  | -2.662299000 |
| C | -2.401201000 | 2.750993000  | -3.246765000 |
| H | -3.942656000 | 3.271395000  | -1.820530000 |
| H | -0.741340000 | 2.050434000  | -4.447501000 |
| H | -2.789831000 | 3.410127000  | -4.026557000 |
| C | -1.463839000 | 0.447865000  | 1.585397000  |
| C | -0.885638000 | 1.540139000  | 2.256349000  |
| C | -2.585469000 | -0.189920000 | 2.135827000  |
| C | -1.434921000 | 1.992493000  | 3.457526000  |
| H | -0.007382000 | 2.031126000  | 1.829377000  |
| C | -3.126674000 | 0.263856000  | 3.342771000  |
| H | -3.039131000 | -1.039733000 | 1.622847000  |
| C | -2.554816000 | 1.354913000  | 4.003670000  |
| H | -0.983511000 | 2.843593000  | 3.972915000  |
| H | -4.000028000 | -0.237667000 | 3.766284000  |
| H | -2.980065000 | 1.707428000  | 4.946308000  |

3A-G

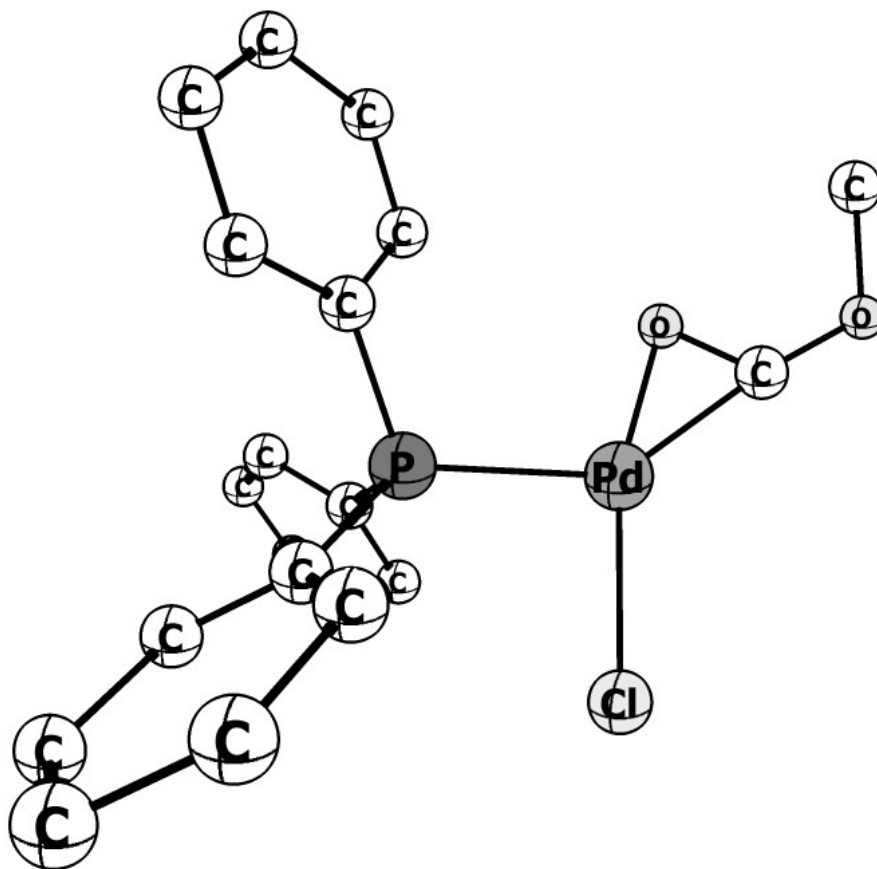

|    |              |              |              |
|----|--------------|--------------|--------------|
| Pd | -1.545029000 | -0.981608000 | 0.082514000  |
| Cl | -0.525939000 | -3.145668000 | 0.207665000  |
| P  | 0.530755000  | 0.099628000  | 0.004686000  |
| C  | -3.458221000 | -0.618674000 | 0.065362000  |
| O  | -2.668519000 | 0.306825000  | -0.001310000 |
| O  | -4.745098000 | -0.531382000 | 0.062993000  |
| C  | -5.330202000 | 0.811761000  | -0.027768000 |
| H  | -6.402495000 | 0.655542000  | -0.018045000 |
| H  | -5.010285000 | 1.397518000  | 0.830272000  |
| H  | -5.008879000 | 1.277908000  | -0.955711000 |
| C  | 0.329114000  | 1.855936000  | -0.423807000 |
| C  | -0.543799000 | 2.623434000  | 0.354400000  |
| C  | 0.987835000  | 2.450678000  | -1.499403000 |
| C  | -0.740936000 | 3.966191000  | 0.067946000  |
| H  | -1.067611000 | 2.170175000  | 1.185652000  |
| C  | 0.782137000  | 3.795623000  | -1.788487000 |
| H  | 1.664089000  | 1.869095000  | -2.109733000 |
| C  | -0.079086000 | 4.555196000  | -1.006174000 |
| H  | -1.414602000 | 4.552648000  | 0.678940000  |
| H  | 1.299976000  | 4.248722000  | -2.623796000 |
| H  | -0.236658000 | 5.601786000  | -1.231709000 |
| C  | 1.679323000  | -0.561172000 | -1.237202000 |
| C  | 3.059568000  | -0.583410000 | -1.039620000 |
| C  | 1.148605000  | -1.036632000 | -2.438402000 |
| C  | 3.898851000  | -1.069427000 | -2.035767000 |
| H  | 3.481402000  | -0.225715000 | -0.110669000 |
| C  | 1.989192000  | -1.512125000 | -3.435016000 |
| H  | 0.076326000  | -1.041851000 | -2.585386000 |
| C  | 3.366346000  | -1.530304000 | -3.234430000 |
| H  | 4.968671000  | -1.087095000 | -1.873792000 |
| H  | 1.570012000  | -1.877456000 | -4.363329000 |
| H  | 4.021340000  | -1.908844000 | -4.008254000 |
| C  | 1.458961000  | 0.127010000  | 1.569449000  |
| C  | 1.397890000  | -0.985258000 | 2.412299000  |
| C  | 2.248212000  | 1.221406000  | 1.929927000  |
| C  | 2.125059000  | -1.002628000 | 3.595591000  |
| H  | 0.785621000  | -1.832277000 | 2.132857000  |
| C  | 2.971089000  | 1.200521000  | 3.116066000  |
| H  | 2.297089000  | 2.089656000  | 1.287493000  |
| C  | 2.911496000  | 0.088956000  | 3.949845000  |
| H  | 2.073427000  | -1.867552000 | 4.244055000  |
| H  | 3.580138000  | 2.052670000  | 3.388150000  |
| H  | 3.473731000  | 0.074933000  | 4.874475000  |

4A

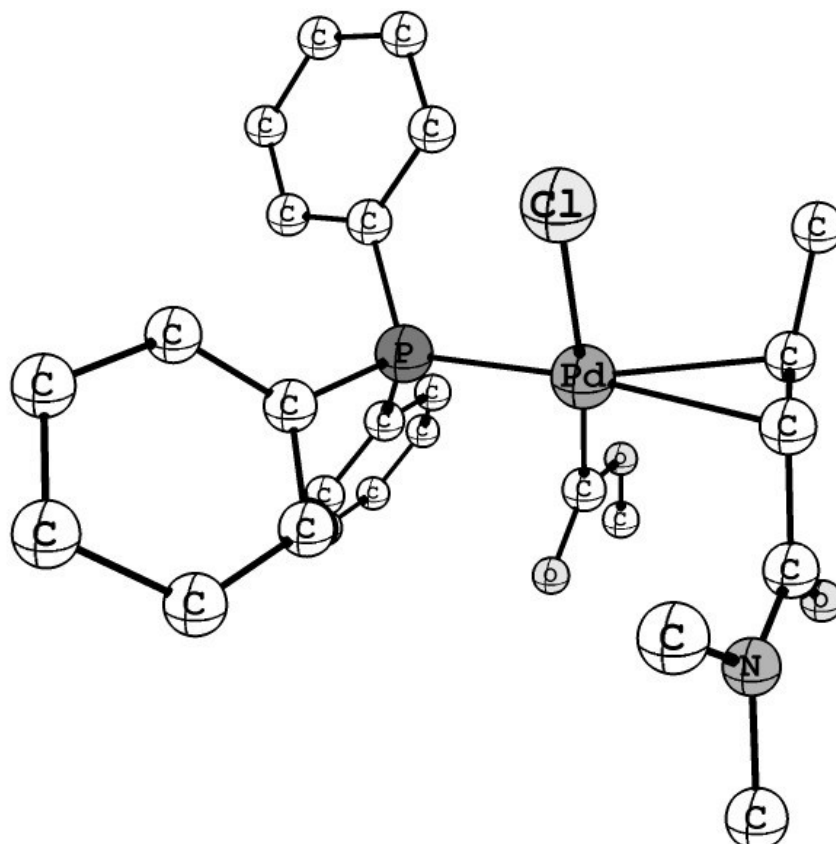

|    |              |              |              |
|----|--------------|--------------|--------------|
| Pd | -0.873532000 | -0.356686000 | -0.735588000 |
| C  | -1.240015000 | 1.521489000  | -0.208040000 |
| O  | -1.534647000 | 1.822911000  | 0.927829000  |
| O  | -1.156367000 | 2.418886000  | -1.201304000 |
| C  | -1.441199000 | 3.786136000  | -0.854231000 |
| H  | -1.306301000 | 4.365554000  | -1.774601000 |
| H  | -2.474747000 | 3.875767000  | -0.491314000 |
| H  | -0.744165000 | 4.133145000  | -0.078706000 |
| C  | -2.584969000 | -0.179180000 | -2.400322000 |
| C  | -3.076511000 | -0.790487000 | -1.273149000 |
| H  | -2.730735000 | 0.901723000  | -2.481976000 |
| H  | -3.077543000 | -1.879217000 | -1.220039000 |
| C  | -3.876542000 | -0.000655000 | -0.271540000 |
| O  | -4.343492000 | 1.097783000  | -0.578955000 |
| N  | -4.055643000 | -0.556974000 | 0.958842000  |
| C  | -3.410191000 | -1.764618000 | 1.447884000  |
| H  | -2.680668000 | -2.161847000 | 0.735628000  |
| H  | -2.865113000 | -1.538439000 | 2.379312000  |
| H  | -4.158389000 | -2.543647000 | 1.673044000  |
| C  | -4.845418000 | 0.158681000  | 1.945041000  |
| H  | -5.568512000 | -0.525809000 | 2.417072000  |
| H  | -4.196306000 | 0.574051000  | 2.735730000  |

|    |              |              |              |
|----|--------------|--------------|--------------|
| H  | -5.377469000 | 0.979546000  | 1.453847000  |
| C  | -2.065542000 | -0.891574000 | -3.607424000 |
| H  | -2.829488000 | -0.842530000 | -4.404162000 |
| H  | -1.164883000 | -0.395486000 | -4.000799000 |
| H  | -1.830808000 | -1.942037000 | -3.394134000 |
| Cl | -0.464838000 | -2.765252000 | -0.972013000 |
| P  | 1.253873000  | -0.052800000 | 0.146317000  |
| C  | 1.735758000  | 1.656236000  | 0.595105000  |
| C  | 1.863778000  | 2.089375000  | 1.920591000  |
| C  | 1.933880000  | 2.567005000  | -0.456377000 |
| C  | 2.181351000  | 3.424499000  | 2.191449000  |
| H  | 1.715449000  | 1.390855000  | 2.744755000  |
| C  | 2.252337000  | 3.896314000  | -0.181855000 |
| H  | 1.832525000  | 2.235360000  | -1.492161000 |
| C  | 2.373049000  | 4.329126000  | 1.144460000  |
| H  | 2.279461000  | 3.755773000  | 3.227707000  |
| H  | 2.403332000  | 4.598653000  | -1.004608000 |
| H  | 2.618637000  | 5.371629000  | 1.359209000  |
| C  | 1.286269000  | -1.006794000 | 1.701325000  |
| C  | 2.293436000  | -1.931030000 | 2.005418000  |
| C  | 0.213376000  | -0.820526000 | 2.592308000  |
| C  | 2.234056000  | -2.657228000 | 3.199390000  |
| H  | 3.119829000  | -2.093711000 | 1.312321000  |
| C  | 0.165681000  | -1.541606000 | 3.785553000  |
| H  | -0.580820000 | -0.111610000 | 2.344355000  |
| C  | 1.175261000  | -2.462711000 | 4.090223000  |
| H  | 3.019653000  | -3.380084000 | 3.430658000  |
| H  | -0.666746000 | -1.390413000 | 4.476534000  |
| H  | 1.132355000  | -3.032435000 | 5.021272000  |
| C  | 2.649353000  | -0.601271000 | -0.896151000 |
| C  | 2.426986000  | -1.303085000 | -2.089360000 |
| C  | 3.963390000  | -0.281646000 | -0.509013000 |
| C  | 3.511531000  | -1.690253000 | -2.881961000 |
| H  | 1.409121000  | -1.559322000 | -2.383164000 |
| C  | 5.041773000  | -0.678079000 | -1.300782000 |
| H  | 4.144031000  | 0.282957000  | 0.407976000  |
| C  | 4.816757000  | -1.382255000 | -2.489234000 |
| H  | 3.332892000  | -2.234920000 | -3.811805000 |
| H  | 6.060085000  | -0.431154000 | -0.992374000 |
| H  | 5.661695000  | -1.686506000 | -3.111370000 |

## TSA45-a

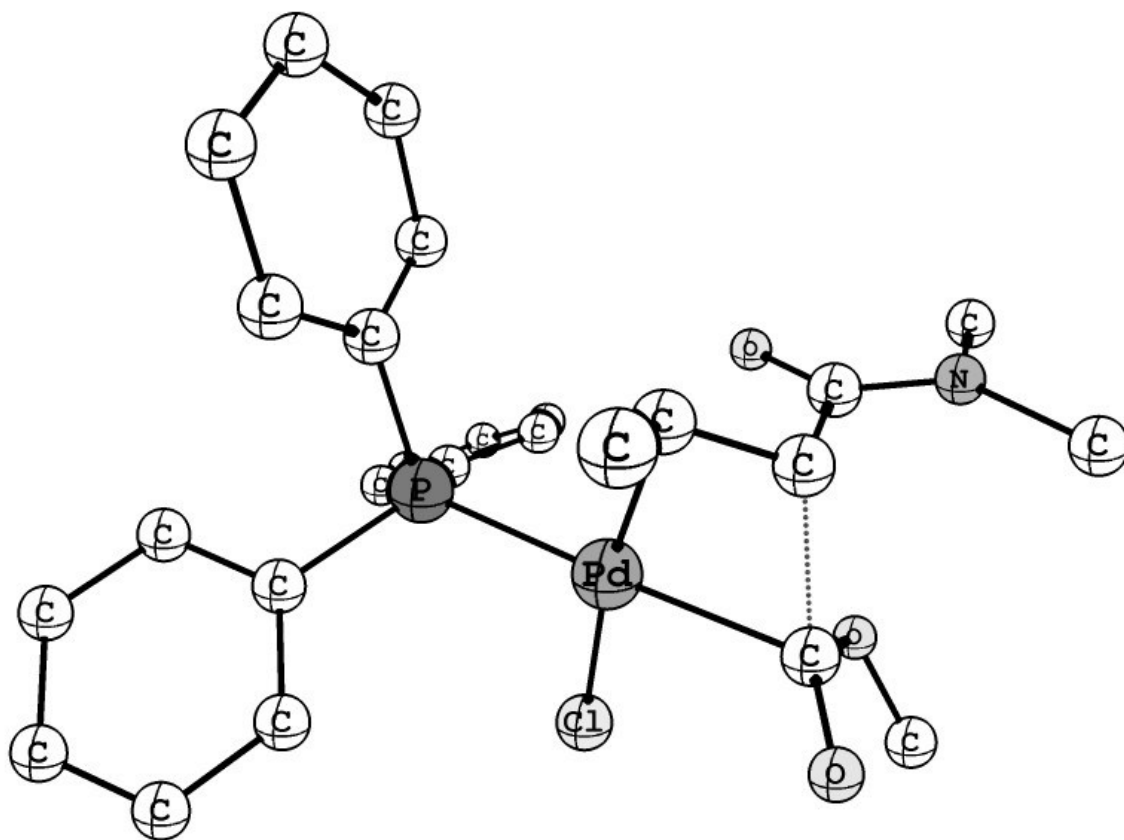

|    |              |              |              |
|----|--------------|--------------|--------------|
| Pd | -0.651797000 | -0.681398000 | -0.509759000 |
| P  | 1.459420000  | 0.089425000  | 0.062492000  |
| Cl | -0.331394000 | -2.853761000 | 0.568584000  |
| C  | -2.668320000 | -1.352240000 | -0.963817000 |
| O  | -2.695353000 | -2.024091000 | -1.965103000 |
| O  | -3.382919000 | -1.559074000 | 0.138867000  |
| C  | -4.070556000 | -2.819893000 | 0.241580000  |
| H  | -3.325642000 | -3.614557000 | 0.387618000  |
| H  | -4.722479000 | -2.736444000 | 1.117877000  |
| H  | -4.658969000 | -3.010288000 | -0.666130000 |
| C  | -2.523336000 | 0.577966000  | -1.135514000 |
| H  | -3.208181000 | 0.474834000  | -1.979735000 |
| C  | -1.197746000 | 1.034221000  | -1.522509000 |
| H  | -0.819254000 | 1.880912000  | -0.943563000 |
| C  | -3.086213000 | 1.198977000  | 0.131832000  |
| O  | -2.313268000 | 1.625112000  | 0.992012000  |
| N  | -4.435213000 | 1.299550000  | 0.255307000  |
| C  | -4.981478000 | 1.900034000  | 1.463451000  |
| H  | -4.184608000 | 2.423575000  | 2.000105000  |
| H  | -5.781454000 | 2.608110000  | 1.197230000  |

|   |              |              |              |
|---|--------------|--------------|--------------|
| H | -5.410421000 | 1.124017000  | 2.121485000  |
| C | -5.431560000 | 0.693878000  | -0.611433000 |
| H | -4.992542000 | 0.240347000  | -1.503352000 |
| H | -5.980577000 | -0.092048000 | -0.065784000 |
| H | -6.158363000 | 1.454867000  | -0.937873000 |
| C | -0.814854000 | 0.999298000  | -2.979641000 |
| H | -1.257356000 | 1.860562000  | -3.512505000 |
| H | 0.274389000  | 1.064886000  | -3.103838000 |
| H | -1.171798000 | 0.079540000  | -3.466711000 |
| C | 1.561843000  | 0.068128000  | 1.892051000  |
| C | 2.719457000  | -0.318714000 | 2.581475000  |
| C | 0.414184000  | 0.444715000  | 2.612922000  |
| C | 2.733391000  | -0.320034000 | 3.979683000  |
| H | 3.610312000  | -0.628772000 | 2.033809000  |
| C | 0.439519000  | 0.451817000  | 4.009143000  |
| H | -0.496719000 | 0.731835000  | 2.080227000  |
| C | 1.596951000  | 0.067663000  | 4.695198000  |
| H | 3.637251000  | -0.628556000 | 4.510147000  |
| H | -0.453546000 | 0.749645000  | 4.563602000  |
| H | 1.610682000  | 0.064427000  | 5.787651000  |
| C | 2.900382000  | -0.847125000 | -0.558390000 |
| C | 4.197465000  | -0.305828000 | -0.509749000 |
| C | 2.706484000  | -2.134648000 | -1.081596000 |
| C | 5.284143000  | -1.046952000 | -0.977238000 |
| H | 4.359820000  | 0.698176000  | -0.113266000 |
| C | 3.798389000  | -2.871594000 | -1.549296000 |
| H | 1.701785000  | -2.560461000 | -1.098216000 |
| C | 5.085928000  | -2.330312000 | -1.498976000 |
| H | 6.288793000  | -0.620092000 | -0.936056000 |
| H | 3.640124000  | -3.873089000 | -1.955937000 |
| H | 5.937462000  | -2.906939000 | -1.867765000 |
| C | 1.817269000  | 1.825231000  | -0.410492000 |
| C | 2.328005000  | 2.102878000  | -1.690300000 |
| C | 1.467962000  | 2.891115000  | 0.432971000  |
| C | 2.492039000  | 3.423309000  | -2.113390000 |
| H | 2.608654000  | 1.285414000  | -2.357252000 |
| C | 1.631954000  | 4.211437000  | 0.004789000  |
| H | 1.065104000  | 2.694664000  | 1.427142000  |
| C | 2.143024000  | 4.481429000  | -1.267831000 |
| H | 2.894555000  | 3.625295000  | -3.108617000 |
| H | 1.359800000  | 5.031974000  | 0.672580000  |
| H | 2.271086000  | 5.514060000  | -1.600157000 |



## TSA45-b

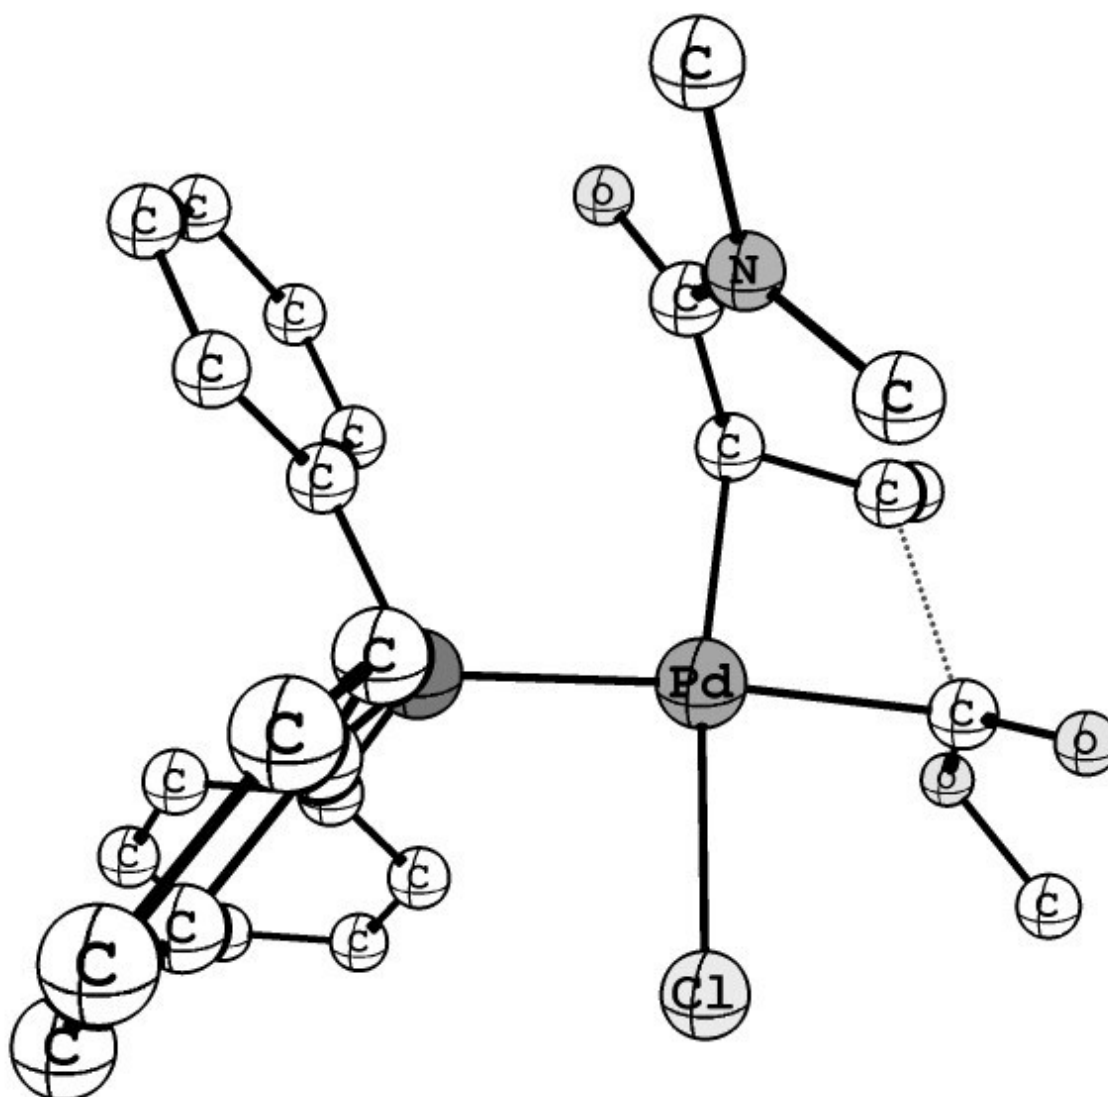

|    |              |              |              |
|----|--------------|--------------|--------------|
| Pd | 1.211846000  | -0.455313000 | -0.043354000 |
| P  | -1.092201000 | -0.274512000 | -0.010074000 |
| Cl | 1.084953000  | -2.398909000 | 1.418152000  |
| C  | 3.391581000  | -0.772562000 | 0.042887000  |
| O  | 3.984227000  | -0.523104000 | 1.061110000  |
| O  | 3.594375000  | -1.838019000 | -0.729435000 |
| C  | 4.448726000  | -2.867892000 | -0.197579000 |
| H  | 3.951983000  | -3.330719000 | 0.666736000  |
| H  | 4.578945000  | -3.597810000 | -1.004043000 |
| H  | 5.416280000  | -2.443831000 | 0.104171000  |
| C  | 2.967436000  | 0.782846000  | -1.126669000 |
| H  | 3.616692000  | 1.391722000  | -0.491600000 |
| C  | 1.578960000  | 1.217124000  | -1.184033000 |

|   |              |              |              |
|---|--------------|--------------|--------------|
| H | 1.110302000  | 1.063622000  | -2.161159000 |
| C | 1.118103000  | 2.567940000  | -0.680114000 |
| N | 1.343209000  | 2.974418000  | 0.610009000  |
| C | 0.930635000  | 4.317865000  | 0.988360000  |
| H | 1.800629000  | 4.994062000  | 1.066749000  |
| H | 0.242744000  | 4.707804000  | 0.231976000  |
| H | 0.428896000  | 4.289973000  | 1.968618000  |
| C | 2.191393000  | 2.305147000  | 1.579363000  |
| H | 2.226135000  | 1.223979000  | 1.414094000  |
| H | 3.222670000  | 2.700287000  | 1.565520000  |
| H | 1.782975000  | 2.465667000  | 2.588389000  |
| C | 3.598270000  | 0.365921000  | -2.438750000 |
| H | 4.601302000  | -0.058038000 | -2.306440000 |
| H | 2.970639000  | -0.365753000 | -2.965383000 |
| H | 3.681000000  | 1.266654000  | -3.069190000 |
| O | 0.521871000  | 3.284566000  | -1.482283000 |
| C | -1.969155000 | -1.728327000 | -0.692847000 |
| C | -1.265790000 | -2.884058000 | -1.059170000 |
| C | -3.361121000 | -1.670711000 | -0.884552000 |
| C | -1.949825000 | -3.974984000 | -1.604408000 |
| H | -0.188558000 | -2.930178000 | -0.899810000 |
| C | -4.040102000 | -2.765225000 | -1.420884000 |
| H | -3.913362000 | -0.766856000 | -0.619050000 |
| C | -3.334519000 | -3.918920000 | -1.782837000 |
| H | -1.395712000 | -4.871800000 | -1.890735000 |
| H | -5.122073000 | -2.715963000 | -1.562626000 |
| H | -3.866698000 | -4.772902000 | -2.208408000 |
| C | -1.651015000 | -0.067052000 | 1.715870000  |
| C | -1.110878000 | 1.003748000  | 2.449111000  |
| C | -2.532830000 | -0.958617000 | 2.340129000  |
| C | -1.467092000 | 1.191532000  | 3.784535000  |
| H | -0.411470000 | 1.688626000  | 1.967953000  |
| C | -2.879921000 | -0.771832000 | 3.682192000  |
| H | -2.944948000 | -1.802938000 | 1.786267000  |
| C | -2.352457000 | 0.301731000  | 4.404453000  |
| H | -1.046655000 | 2.029799000  | 4.344556000  |
| H | -3.565116000 | -1.472800000 | 4.164310000  |
| H | -2.626022000 | 0.443550000  | 5.452462000  |
| C | -1.860059000 | 1.098438000  | -0.949525000 |
| C | -1.742158000 | 1.060153000  | -2.349213000 |
| C | -2.542623000 | 2.160464000  | -0.344232000 |
| C | -2.307386000 | 2.065604000  | -3.130408000 |
| H | -1.212674000 | 0.233503000  | -2.829775000 |
| C | -3.104006000 | 3.171208000  | -1.131983000 |
| H | -2.649899000 | 2.201109000  | 0.739781000  |
| C | -2.990332000 | 3.125502000  | -2.522608000 |

|   |              |             |              |
|---|--------------|-------------|--------------|
| H | -2.21366000  | 2.024585000 | -4.218005000 |
| H | -3.637372000 | 3.994587000 | -0.651289000 |
| H | -3.432323000 | 3.914882000 | -3.134977000 |

5A-a

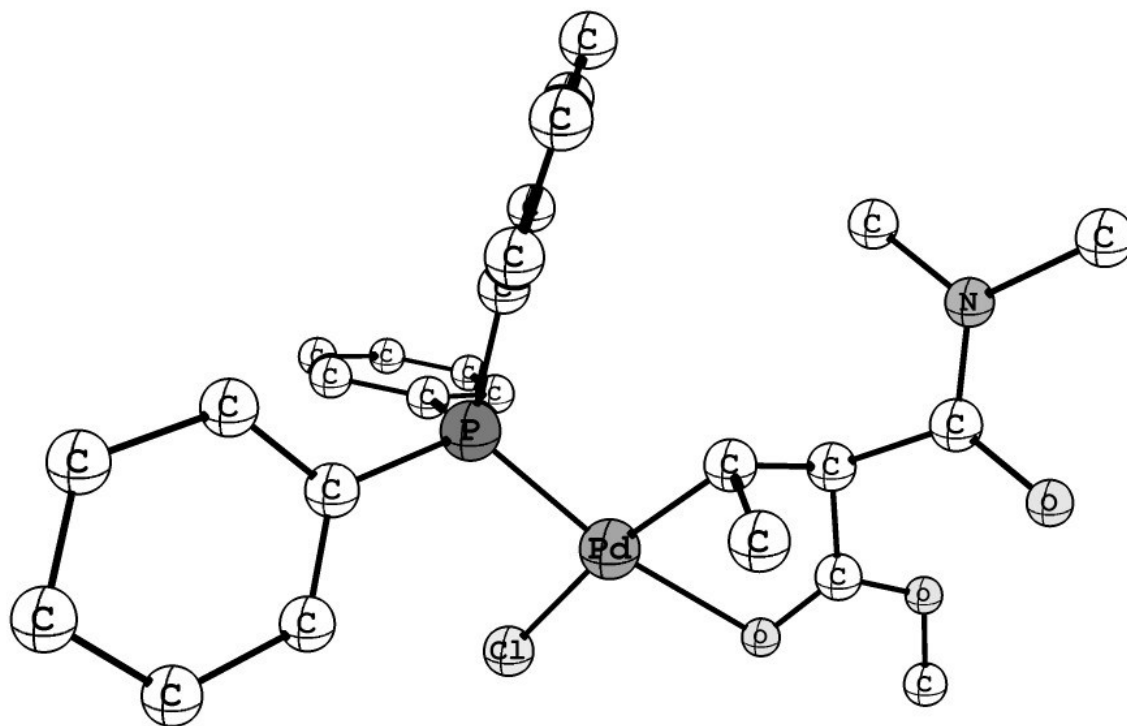

|    |              |              |              |
|----|--------------|--------------|--------------|
| Pd | -0.243305000 | -1.275867000 | -0.228468000 |
| C  | -1.621370000 | 0.196654000  | -0.582796000 |
| C  | -2.878797000 | -0.241927000 | 0.205854000  |
| H  | -1.304626000 | 1.170009000  | -0.199510000 |
| C  | -4.093024000 | 0.598994000  | -0.204854000 |
| O  | -4.873806000 | 0.179704000  | -1.055091000 |
| N  | -4.192447000 | 1.845109000  | 0.339854000  |
| C  | -3.251230000 | 2.453616000  | 1.266716000  |
| H  | -2.588104000 | 1.716199000  | 1.727591000  |
| H  | -2.624246000 | 3.205868000  | 0.758519000  |
| H  | -3.804906000 | 2.958995000  | 2.073699000  |
| C  | -5.234419000 | 2.740693000  | -0.138542000 |
| H  | -5.845197000 | 3.101150000  | 0.705331000  |
| H  | -4.788976000 | 3.617345000  | -0.639641000 |
| H  | -5.869913000 | 2.202235000  | -0.848492000 |
| C  | -1.828800000 | 0.272311000  | -2.091916000 |
| H  | -2.592678000 | 1.021930000  | -2.366153000 |
| H  | -0.893044000 | 0.558173000  | -2.594400000 |
| H  | -2.152629000 | -0.692572000 | -2.512956000 |

|    |              |              |              |
|----|--------------|--------------|--------------|
| H  | -2.674220000 | -0.127590000 | 1.282275000  |
| C  | -3.085268000 | -1.728224000 | 0.041860000  |
| O  | -2.150820000 | -2.459355000 | -0.295562000 |
| O  | -4.262906000 | -2.198551000 | 0.367659000  |
| C  | -4.460671000 | -3.622630000 | 0.294863000  |
| H  | -5.496265000 | -3.794845000 | 0.605769000  |
| H  | -4.302672000 | -3.972821000 | -0.734153000 |
| H  | -3.762118000 | -4.136806000 | 0.969017000  |
| Cl | 1.168218000  | -3.252583000 | 0.055852000  |
| P  | 1.447475000  | 0.183937000  | -0.003768000 |
| C  | 2.652404000  | 0.163897000  | -1.382331000 |
| C  | 2.795634000  | -1.006641000 | -2.144977000 |
| C  | 3.459151000  | 1.279272000  | -1.667104000 |
| C  | 3.730910000  | -1.055413000 | -3.181865000 |
| H  | 2.188280000  | -1.881294000 | -1.903305000 |
| C  | 4.390896000  | 1.224329000  | -2.706202000 |
| H  | 3.360192000  | 2.194605000  | -1.081770000 |
| C  | 4.526433000  | 0.058552000  | -3.466800000 |
| H  | 3.836421000  | -1.969188000 | -3.771234000 |
| H  | 5.012235000  | 2.096495000  | -2.921784000 |
| H  | 5.252970000  | 0.019194000  | -4.281796000 |
| C  | 0.980099000  | 1.950369000  | 0.166364000  |
| C  | 0.846542000  | 2.540098000  | 1.432053000  |
| C  | 0.619633000  | 2.687595000  | -0.975091000 |
| C  | 0.364022000  | 3.846715000  | 1.553468000  |
| H  | 1.117062000  | 1.981061000  | 2.328798000  |
| C  | 0.140430000  | 3.992363000  | -0.850305000 |
| H  | 0.710527000  | 2.242189000  | -1.967389000 |
| C  | 0.009498000  | 4.575237000  | 0.414948000  |
| H  | 0.266585000  | 4.295406000  | 2.544567000  |
| H  | -0.134558000 | 4.554753000  | -1.745366000 |
| H  | -0.368282000 | 5.595480000  | 0.511804000  |
| C  | 2.409224000  | -0.168146000 | 1.514373000  |
| C  | 3.790312000  | 0.061694000  | 1.588775000  |
| C  | 1.724434000  | -0.649618000 | 2.641687000  |
| C  | 4.476770000  | -0.183537000 | 2.781436000  |
| H  | 4.335740000  | 0.426289000  | 0.717011000  |
| C  | 2.411569000  | -0.883230000 | 3.834242000  |
| H  | 0.651001000  | -0.842396000 | 2.577795000  |
| C  | 3.789712000  | -0.652699000 | 3.905043000  |
| H  | 5.553877000  | -0.008184000 | 2.830598000  |
| H  | 1.871302000  | -1.254874000 | 4.707826000  |
| H  | 4.329254000  | -0.844127000 | 4.835490000  |

## 5A-b

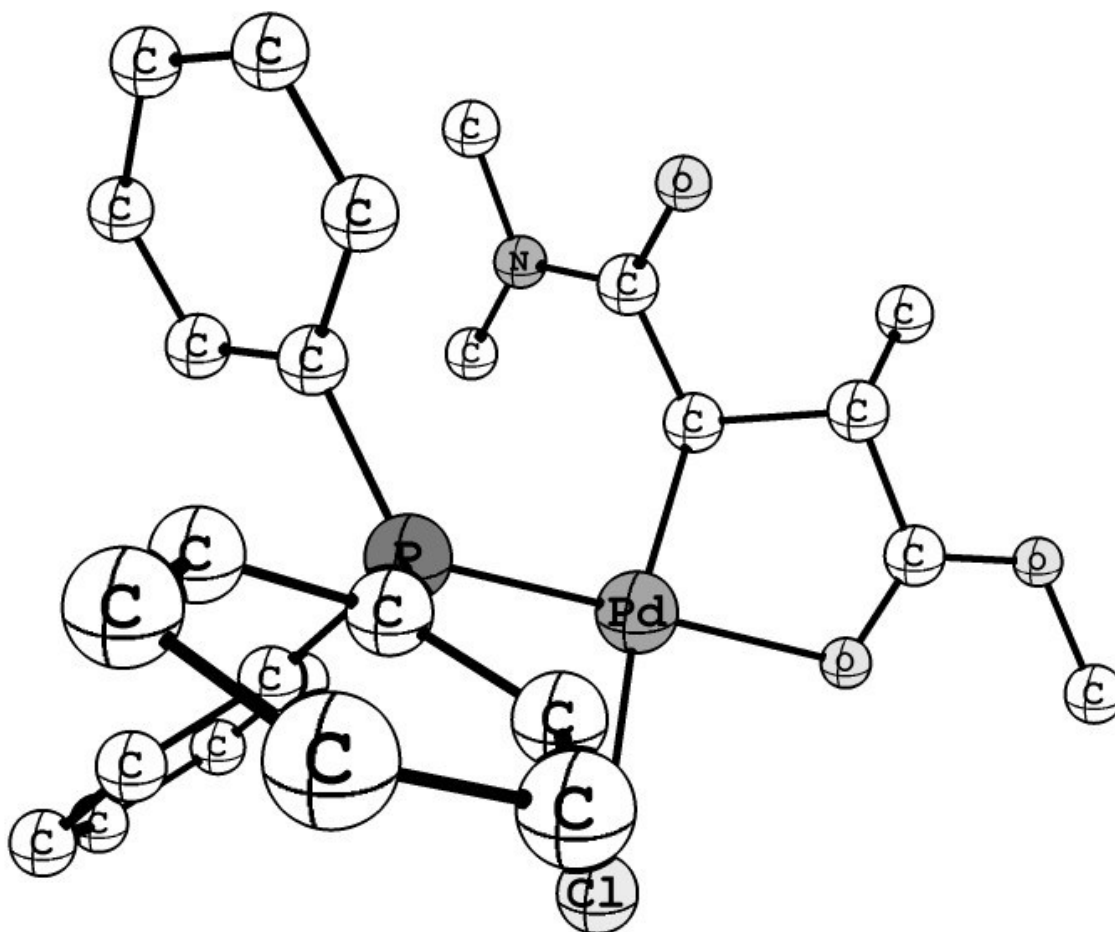

|    |              |              |              |
|----|--------------|--------------|--------------|
| Pd | 1.132558000  | -0.803853000 | -0.284664000 |
| C  | 3.967903000  | -0.531135000 | 0.150137000  |
| O  | 3.247862000  | -1.421771000 | -0.313137000 |
| O  | 5.255170000  | -0.709188000 | 0.333298000  |
| C  | 5.813790000  | -1.992960000 | -0.003410000 |
| H  | 6.882791000  | -1.919882000 | 0.221635000  |
| H  | 5.343084000  | -2.779493000 | 0.601901000  |
| H  | 5.655619000  | -2.205297000 | -1.069336000 |
| C  | 3.412982000  | 0.809401000  | 0.545134000  |
| C  | 2.115845000  | 1.035699000  | -0.255273000 |
| H  | 3.146740000  | 0.713492000  | 1.613051000  |
| H  | 2.373585000  | 1.098490000  | -1.322792000 |
| C  | 1.418321000  | 2.272181000  | 0.214860000  |
| O  | 1.457708000  | 2.608994000  | 1.405341000  |
| N  | 0.784229000  | 3.038203000  | -0.724195000 |
| C  | 0.658195000  | 2.673685000  | -2.122260000 |
| H  | 0.612553000  | 1.586187000  | -2.243744000 |
| H  | -0.282113000 | 3.088205000  | -2.514027000 |

|    |              |              |              |
|----|--------------|--------------|--------------|
| H  | 1.489275000  | 3.064855000  | -2.736916000 |
| C  | 0.320793000  | 4.367542000  | -0.372359000 |
| H  | 0.931692000  | 5.136486000  | -0.879451000 |
| H  | -0.727567000 | 4.502547000  | -0.673837000 |
| H  | 0.403464000  | 4.493698000  | 0.710975000  |
| C  | 4.431214000  | 1.948334000  | 0.404022000  |
| H  | 3.987361000  | 2.881799000  | 0.773055000  |
| H  | 5.339539000  | 1.740446000  | 0.986927000  |
| H  | 4.720094000  | 2.086214000  | -0.649749000 |
| P  | -1.045541000 | -0.288279000 | 0.042063000  |
| Cl | 0.435057000  | -3.113040000 | -0.582550000 |
| C  | -2.012698000 | -0.944050000 | -1.374467000 |
| C  | -3.239627000 | -1.601088000 | -1.214204000 |
| C  | -1.500416000 | -0.749063000 | -2.667124000 |
| C  | -3.948716000 | -2.046899000 | -2.333732000 |
| H  | -3.643979000 | -1.779993000 | -0.218109000 |
| C  | -2.215688000 | -1.184197000 | -3.783893000 |
| H  | -0.529943000 | -0.266919000 | -2.799548000 |
| C  | -3.443043000 | -1.835044000 | -3.619208000 |
| H  | -4.900929000 | -2.564593000 | -2.197096000 |
| H  | -1.808120000 | -1.023590000 | -4.784514000 |
| H  | -4.000144000 | -2.183342000 | -4.491958000 |
| C  | -1.693631000 | -1.093002000 | 1.565566000  |
| C  | -2.983063000 | -0.774059000 | 2.030827000  |
| C  | -0.909141000 | -1.999082000 | 2.294011000  |
| C  | -3.482740000 | -1.368529000 | 3.190469000  |
| H  | -3.598013000 | -0.049995000 | 1.494522000  |
| C  | -1.409122000 | -2.583161000 | 3.461602000  |
| H  | 0.087041000  | -2.258212000 | 1.937513000  |
| C  | -2.695526000 | -2.273783000 | 3.910076000  |
| H  | -4.487647000 | -1.116692000 | 3.536784000  |
| H  | -0.786032000 | -3.283418000 | 4.022644000  |
| H  | -3.084014000 | -2.732348000 | 4.822431000  |
| C  | -1.730862000 | 1.402180000  | 0.259744000  |
| C  | -2.537400000 | 2.004254000  | -0.716881000 |
| C  | -1.535419000 | 2.051173000  | 1.490221000  |
| C  | -3.168472000 | 3.223520000  | -0.452252000 |
| H  | -2.697297000 | 1.512674000  | -1.676859000 |
| C  | -2.169080000 | 3.265634000  | 1.750484000  |
| H  | -0.898619000 | 1.597816000  | 2.249876000  |
| C  | -2.996475000 | 3.849158000  | 0.785373000  |
| H  | -3.805491000 | 3.677683000  | -1.214516000 |
| H  | -2.017568000 | 3.758215000  | 2.713509000  |
| H  | -3.498954000 | 4.796130000  | 0.995181000  |

## 6A-a

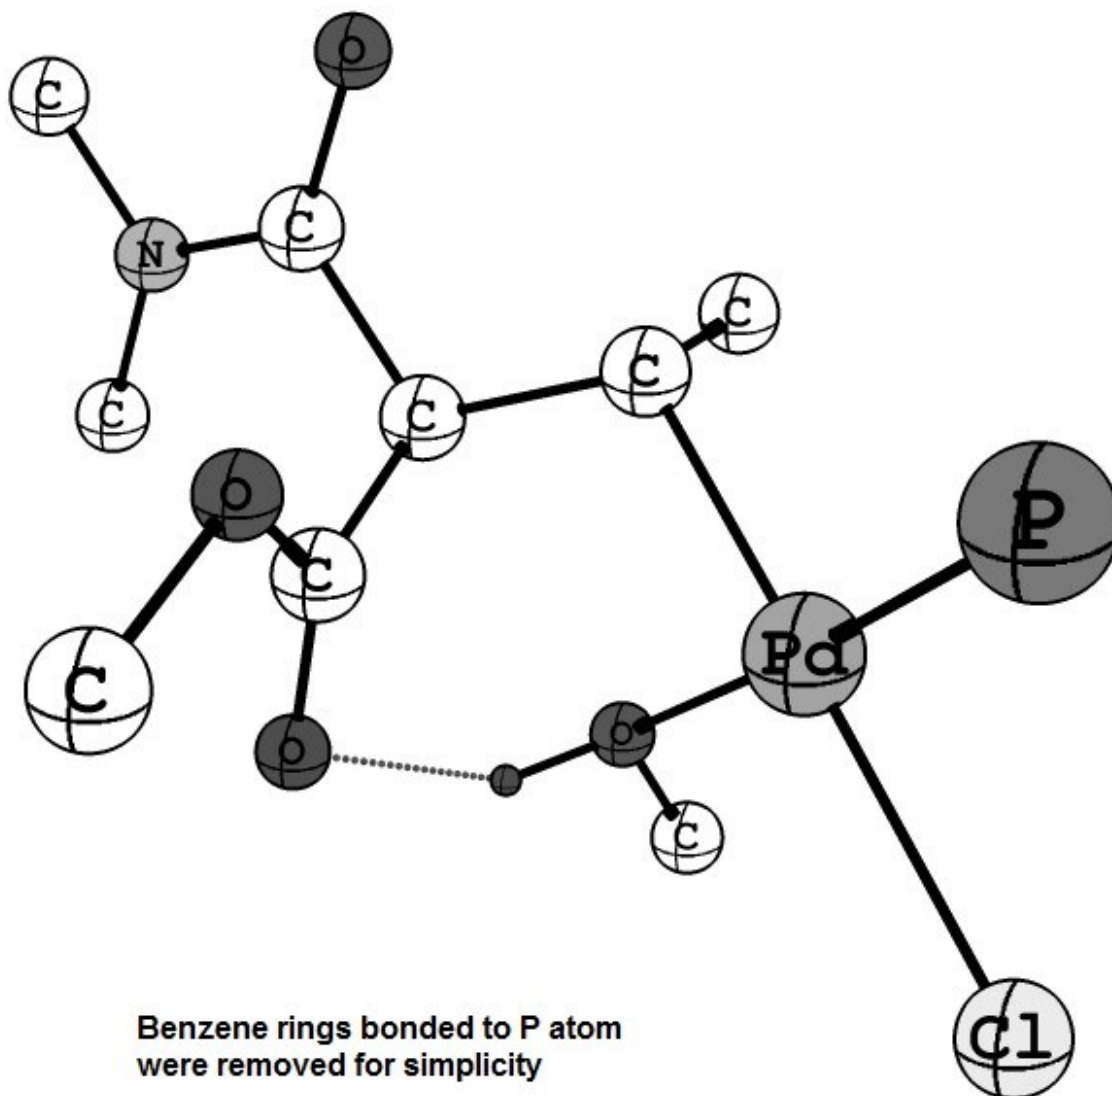

|    |              |              |              |
|----|--------------|--------------|--------------|
| Pd | -0.009064000 | -1.393727000 | -0.471731000 |
| P  | 1.389393000  | 0.325376000  | -0.051050000 |
| Cl | 1.599902000  | -3.104515000 | 0.284149000  |
| C  | -2.468923000 | -0.523156000 | 1.019321000  |
| O  | -2.530912000 | -1.600088000 | 1.592407000  |
| O  | -2.120656000 | 0.603155000  | 1.633391000  |
| C  | -1.754992000 | 0.514447000  | 3.020490000  |
| H  | -0.925852000 | -0.192463000 | 3.147869000  |
| H  | -1.439051000 | 1.521703000  | 3.311376000  |
| H  | -2.617384000 | 0.189588000  | 3.618604000  |
| C  | -2.765721000 | -0.323701000 | -0.456510000 |
| H  | -3.247258000 | -1.248421000 | -0.791064000 |
| C  | -1.455409000 | -0.142800000 | -1.245327000 |

|   |              |              |              |
|---|--------------|--------------|--------------|
| H | -1.168718000 | 0.905112000  | -1.166202000 |
| C | -3.733378000 | 0.863258000  | -0.673332000 |
| O | -3.333561000 | 1.923305000  | -1.143916000 |
| C | -6.003316000 | 1.725729000  | -0.553785000 |
| H | -5.479078000 | 2.608708000  | -0.932653000 |
| H | -6.753726000 | 1.401849000  | -1.295628000 |
| H | -6.530944000 | 1.981699000  | 0.379604000  |
| C | -5.599887000 | -0.584892000 | 0.166684000  |
| H | -4.844702000 | -1.241023000 | 0.608519000  |
| H | -6.343665000 | -0.366983000 | 0.948202000  |
| H | -6.111440000 | -1.131056000 | -0.645870000 |
| N | -5.034477000 | 0.667800000  | -0.311965000 |
| C | -1.608602000 | -0.518053000 | -2.710720000 |
| H | -0.686322000 | -0.296932000 | -3.270516000 |
| H | -1.842618000 | -1.587014000 | -2.836515000 |
| H | -2.426831000 | 0.062087000  | -3.177700000 |
| H | -2.036632000 | -2.879780000 | 0.260496000  |
| C | -1.356852000 | -4.338791000 | -0.931092000 |
| H | -0.590458000 | -4.782171000 | -0.278808000 |
| H | -2.296404000 | -4.909506000 | -0.859388000 |
| H | -0.999433000 | -4.371576000 | -1.969182000 |
| O | -1.593677000 | -2.971574000 | -0.607968000 |
| C | 1.008271000  | 1.996826000  | -0.702839000 |
| C | 1.775108000  | 2.578579000  | -1.723741000 |
| C | -0.110234000 | 2.690143000  | -0.205173000 |
| C | 1.433270000  | 3.836129000  | -2.231289000 |
| H | 2.643833000  | 2.055896000  | -2.124857000 |
| C | -0.445418000 | 3.945113000  | -0.712317000 |
| H | -0.733772000 | 2.241280000  | 0.568288000  |
| C | 0.325842000  | 4.522508000  | -1.726428000 |
| H | 2.039340000  | 4.279641000  | -3.024605000 |
| H | -1.323286000 | 4.464577000  | -0.322906000 |
| H | 0.060549000  | 5.504176000  | -2.125804000 |
| C | 3.064895000  | -0.005488000 | -0.706952000 |
| C | 4.214053000  | 0.454914000  | -0.049451000 |
| C | 3.186969000  | -0.682055000 | -1.930275000 |
| C | 5.475019000  | 0.239793000  | -0.613071000 |
| H | 4.126661000  | 0.981455000  | 0.902697000  |
| C | 4.447154000  | -0.886997000 | -2.495091000 |
| H | 2.290377000  | -1.047873000 | -2.435572000 |
| C | 5.593067000  | -0.428408000 | -1.835713000 |
| H | 6.367930000  | 0.596665000  | -0.094639000 |
| H | 4.536005000  | -1.412196000 | -3.448784000 |
| H | 6.579638000  | -0.595020000 | -2.274483000 |
| C | 1.623987000  | 0.594863000  | 1.753700000  |
| C | 1.702055000  | -0.527268000 | 2.596760000  |



|   |             |              |             |
|---|-------------|--------------|-------------|
| C | 1.747939000 | 1.879428000  | 2.306422000 |
| C | 1.888057000 | -0.361263000 | 3.970424000 |
| H | 1.621696000 | -1.527797000 | 2.165825000 |
| C | 1.924476000 | 2.039150000  | 3.684146000 |
| H | 1.706186000 | 2.761752000  | 1.668151000 |
| C | 1.991070000 | 0.921232000  | 4.519670000 |
| H | 1.945402000 | -1.240389000 | 4.616550000 |
| H | 2.012395000 | 3.044258000  | 4.102949000 |
| H | 2.126039000 | 1.048872000  | 5.596256000 |

6A-a-t

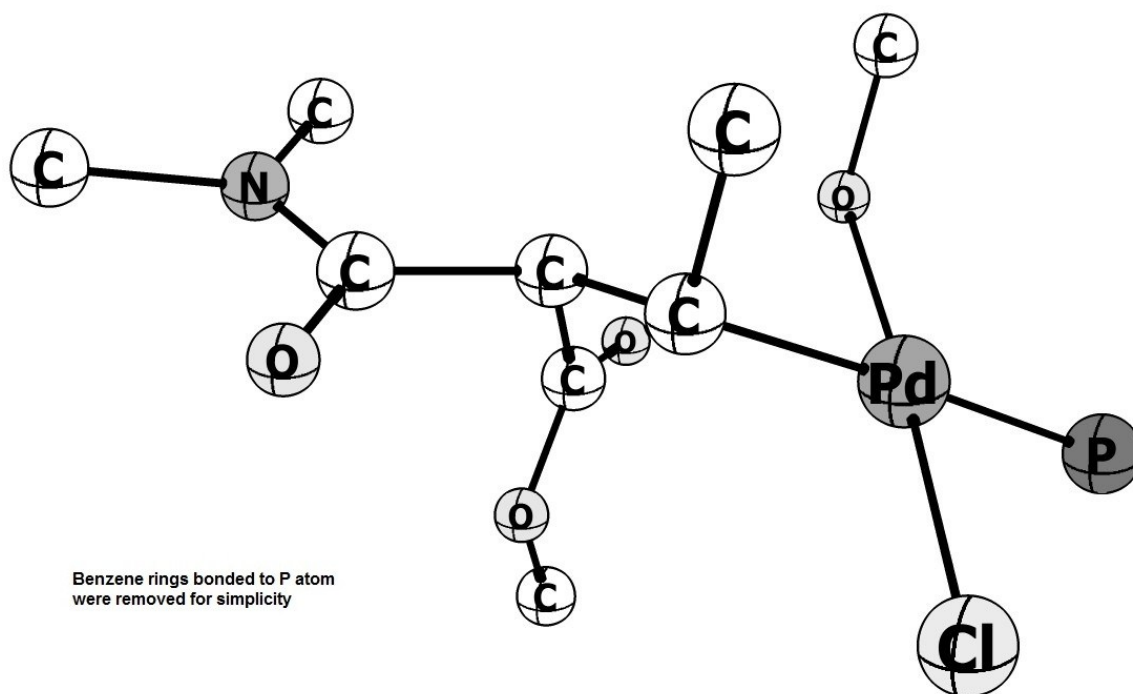

|    |             |              |              |
|----|-------------|--------------|--------------|
| Pd | 0.475246000 | -0.436592000 | -0.667889000 |
| C  | 2.900138000 | 0.454039000  | 0.984826000  |
| O  | 2.381969000 | 1.524048000  | 1.256755000  |
| O  | 3.055378000 | -0.528391000 | 1.863109000  |
| C  | 2.524011000 | -0.315272000 | 3.188403000  |
| H  | 1.470168000 | -0.055558000 | 3.131237000  |
| H  | 2.663231000 | -1.257902000 | 3.706530000  |
| H  | 3.075005000 | 0.481189000  | 3.684650000  |
| C  | 3.416305000 | 0.096760000  | -0.390955000 |
| H  | 3.409362000 | 1.022988000  | -0.958065000 |
| C  | 2.474474000 | -0.896994000 | -1.074500000 |
| H  | 2.631996000 | -1.886270000 | -0.661403000 |
| C  | 4.858202000 | -0.462773000 | -0.309555000 |
| O  | 5.067481000 | -1.670161000 | -0.383184000 |

|    |              |              |              |
|----|--------------|--------------|--------------|
| C  | 7.242512000  | -0.020544000 | -0.141701000 |
| H  | 7.264114000  | -1.102081000 | -0.205923000 |
| H  | 7.786822000  | 0.405457000  | -0.987899000 |
| H  | 7.729586000  | 0.300878000  | 0.780669000  |
| C  | 5.702387000  | 1.883071000  | -0.103780000 |
| H  | 4.691035000  | 2.175746000  | 0.151295000  |
| H  | 6.367243000  | 2.277756000  | 0.664767000  |
| H  | 5.974089000  | 2.340154000  | -1.058900000 |
| N  | 5.859454000  | 0.435833000  | -0.156837000 |
| C  | 2.647996000  | -0.880038000 | -2.581696000 |
| H  | 2.006910000  | -1.625675000 | -3.049742000 |
| H  | 2.406546000  | 0.096424000  | -3.007219000 |
| H  | 3.683326000  | -1.110400000 | -2.865755000 |
| H  | 1.405503000  | 2.183116000  | -0.110194000 |
| C  | 0.928627000  | 2.587211000  | -2.069084000 |
| H  | 0.282570000  | 3.465328000  | -1.984473000 |
| H  | 1.939780000  | 2.901972000  | -2.328713000 |
| H  | 0.542748000  | 1.931428000  | -2.844765000 |
| O  | 0.885745000  | 1.841901000  | -0.858435000 |
| Cl | 0.170901000  | -2.752887000 | -0.391253000 |
| P  | -1.856407000 | 0.069123000  | -0.097186000 |
| C  | -3.006451000 | -1.278038000 | -0.576142000 |
| C  | -3.021802000 | -1.668465000 | -1.916556000 |
| C  | -3.838449000 | -1.935627000 | 0.328752000  |
| C  | -3.863087000 | -2.684423000 | -2.345180000 |
| H  | -2.365553000 | -1.181230000 | -2.625049000 |
| C  | -4.674653000 | -2.961601000 | -0.099238000 |
| H  | -3.840542000 | -1.653877000 | 1.369345000  |
| C  | -4.692053000 | -3.334794000 | -1.435472000 |
| H  | -3.861903000 | -2.977964000 | -3.386084000 |
| H  | -5.318001000 | -3.461955000 | 0.612677000  |
| H  | -5.345187000 | -4.131106000 | -1.766853000 |

## 6A-b

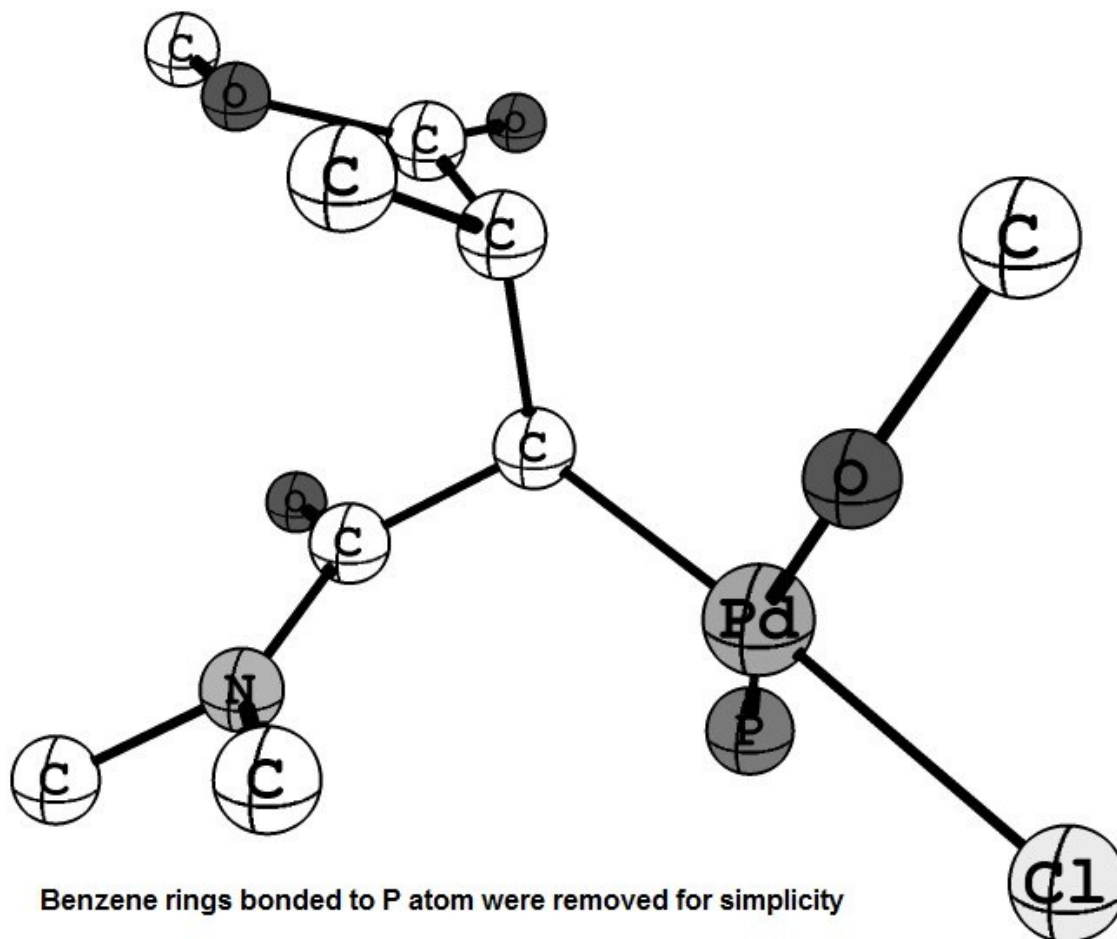

|    |             |             |             |
|----|-------------|-------------|-------------|
| Pd | 0.04134000  | -1.42848800 | -0.21501000 |
| P  | -1.30360900 | 0.37515800  | -0.09866700 |
| Cl | -1.87468700 | -2.98676100 | -0.00850400 |
| C  | 3.82723100  | 0.27444300  | -1.38557200 |
| O  | 3.54947600  | 0.94385900  | -2.35751700 |
| O  | 4.89368900  | 0.51463500  | -0.61422700 |
| C  | 5.64252800  | 1.69558800  | -0.90959900 |
| H  | 5.00794200  | 2.58433400  | -0.77829300 |
| H  | 6.47625600  | 1.71616700  | -0.19815800 |
| H  | 6.02085400  | 1.67266200  | -1.94154900 |
| C  | 2.97592600  | -0.88864100 | -0.88128600 |
| H  | 2.63077600  | -1.38367700 | -1.80104900 |
| C  | 1.72310200  | -0.22903100 | -0.23403200 |
| H  | 1.46420500  | 0.59256100  | -0.90496700 |
| C  | 2.07212900  | 0.49067900  | 1.06585300  |
| N  | 1.94162400  | -0.12661600 | 2.28331900  |
| C  | 2.28087700  | 0.61958900  | 3.48408000  |

|   |              |              |              |
|---|--------------|--------------|--------------|
| H | 3.267894000  | 0.316302000  | 3.876782000  |
| H | 2.305304000  | 1.688343000  | 3.249457000  |
| H | 1.528635000  | 0.425644000  | 4.265585000  |
| C | 1.681159000  | -1.535834000 | 2.507263000  |
| H | 1.529914000  | -2.067521000 | 1.565118000  |
| H | 2.534663000  | -2.002203000 | 3.027884000  |
| H | 0.781771000  | -1.673398000 | 3.130181000  |
| C | 3.763548000  | -1.876715000 | -0.021611000 |
| H | 4.647085000  | -2.240204000 | -0.567248000 |
| H | 4.119631000  | -1.403544000 | 0.903776000  |
| H | 3.144687000  | -2.741399000 | 0.243005000  |
| O | 2.480856000  | 1.651317000  | 0.991958000  |
| H | 0.136705000  | -3.850634000 | -0.158315000 |
| C | 1.356314000  | -3.954387000 | -1.699422000 |
| H | 1.508185000  | -5.044431000 | -1.663124000 |
| H | 0.577973000  | -3.714302000 | -2.441179000 |
| H | 2.298171000  | -3.479469000 | -1.998437000 |
| O | 1.005966000  | -3.463293000 | -0.403082000 |
| H | -1.005925000 | 2.636085000  | 1.879698000  |
| H | -0.031194000 | 1.788362000  | -2.245917000 |
| H | 0.062540000  | 4.857580000  | 1.669955000  |
| H | 1.055746000  | 4.004382000  | -2.443681000 |
| H | 1.107412000  | 5.551470000  | -0.483901000 |
| H | -0.436599000 | 0.282521000  | 2.635137000  |
| H | -4.226776000 | 0.235439000  | 0.566953000  |
| H | -1.619604000 | 0.123507000  | 4.812592000  |
| H | -5.406185000 | 0.055031000  | 2.738594000  |
| H | -4.114161000 | 0.004347000  | 4.869895000  |
| H | -1.958237000 | -1.464926000 | -2.318888000 |
| H | -3.276097000 | 2.384230000  | -0.869664000 |
| H | -3.578930000 | -1.305419000 | -4.200465000 |
| H | -4.917797000 | 2.523219000  | -2.720792000 |
| H | -5.071576000 | 0.682000000  | -4.397662000 |

6A-b-t

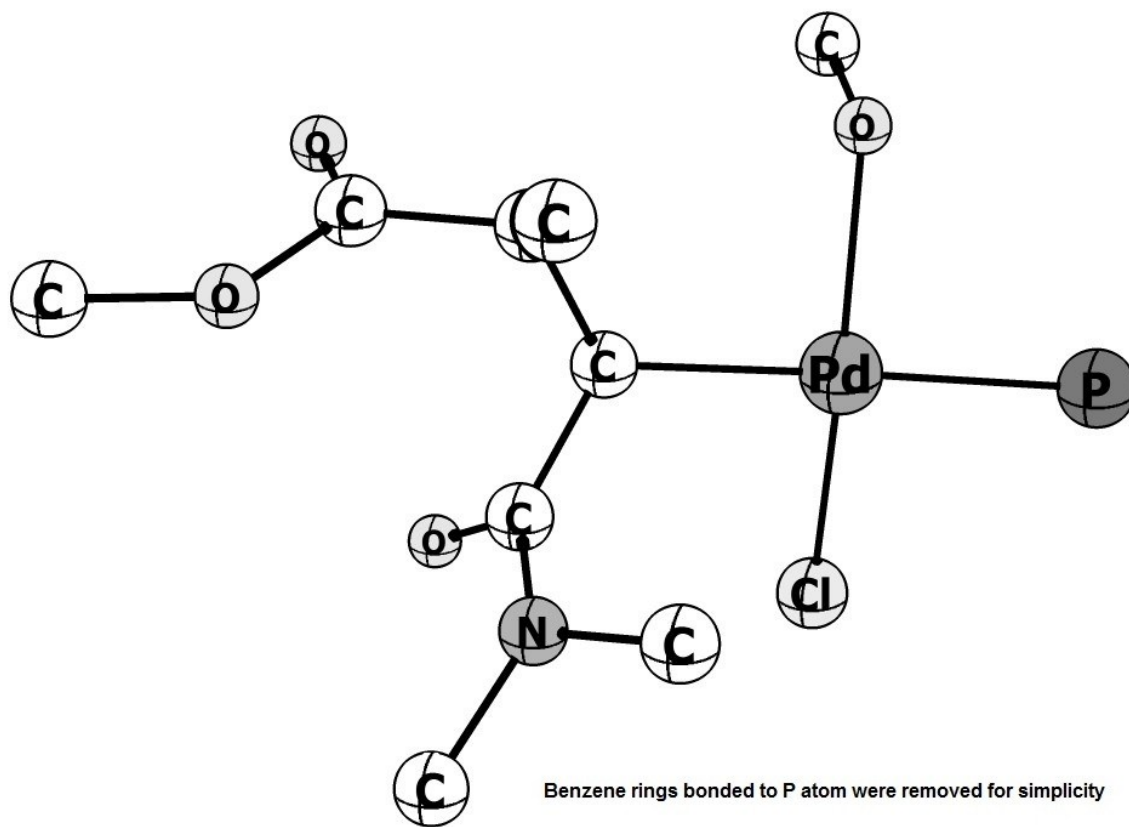

|    |              |              |              |
|----|--------------|--------------|--------------|
| Pd | -0.455301000 | -0.165723000 | 0.308853000  |
| C  | -4.663318000 | -1.504011000 | 0.144240000  |
| O  | -4.953124000 | -2.290874000 | 1.019670000  |
| O  | -5.559448000 | -0.694026000 | -0.433643000 |
| C  | -6.900163000 | -0.744881000 | 0.082191000  |
| H  | -6.905267000 | -0.489939000 | 1.140595000  |
| H  | -7.460690000 | -0.010880000 | -0.488674000 |
| H  | -7.323215000 | -1.738677000 | -0.055463000 |
| C  | -3.253388000 | -1.298989000 | -0.384855000 |
| H  | -2.769660000 | -2.256735000 | -0.216407000 |
| C  | -2.554620000 | -0.276846000 | 0.551594000  |
| H  | -2.595693000 | -0.693232000 | 1.558433000  |
| C  | -3.302729000 | 1.032331000  | 0.675124000  |
| N  | -3.294130000 | 1.952556000  | -0.325093000 |
| C  | -4.097323000 | 3.152212000  | -0.159769000 |
| H  | -4.344396000 | 3.548101000  | -1.144631000 |
| H  | -5.010289000 | 2.914957000  | 0.377308000  |
| H  | -3.554749000 | 3.922679000  | 0.398527000  |
| C  | -2.314945000 | 2.031363000  | -1.390390000 |
| H  | -1.717375000 | 1.128713000  | -1.427006000 |
| H  | -2.813453000 | 2.166915000  | -2.352242000 |
| H  | -1.642375000 | 2.876430000  | -1.219687000 |

|    |              |              |              |
|----|--------------|--------------|--------------|
| C  | -3.221753000 | -1.011287000 | -1.883500000 |
| H  | -3.704773000 | -1.822776000 | -2.430553000 |
| H  | -3.737314000 | -0.087888000 | -2.132853000 |
| H  | -2.190475000 | -0.942065000 | -2.225289000 |
| O  | -3.997229000 | 1.220480000  | 1.684023000  |
| H  | 0.335148000  | -2.305582000 | -1.087577000 |
| C  | -0.411709000 | -3.250437000 | 0.482187000  |
| H  | -0.434099000 | -4.217714000 | -0.018037000 |
| H  | 0.470252000  | -3.171612000 | 1.116182000  |
| H  | -1.302962000 | -3.129627000 | 1.089865000  |
| O  | -0.432970000 | -2.198683000 | -0.506603000 |
| Cl | -0.451006000 | 1.845136000  | 1.503517000  |
| P  | 1.908919000  | 0.021921000  | 0.009477000  |
| C  | 2.404091000  | 1.656183000  | -0.620377000 |
| C  | 3.569122000  | 2.306362000  | -0.216045000 |
| C  | 1.560842000  | 2.279341000  | -1.544665000 |
| C  | 3.891433000  | 3.554416000  | -0.738035000 |
| H  | 4.223219000  | 1.850563000  | 0.512998000  |
| C  | 1.889462000  | 3.519230000  | -2.073089000 |
| H  | 0.640976000  | 1.794403000  | -1.840216000 |
| C  | 3.056702000  | 4.160553000  | -1.669510000 |
| H  | 4.795541000  | 4.052500000  | -0.412981000 |
| H  | 1.229227000  | 3.990114000  | -2.789615000 |
| H  | 3.309401000  | 5.132011000  | -2.073843000 |

TSA61-a

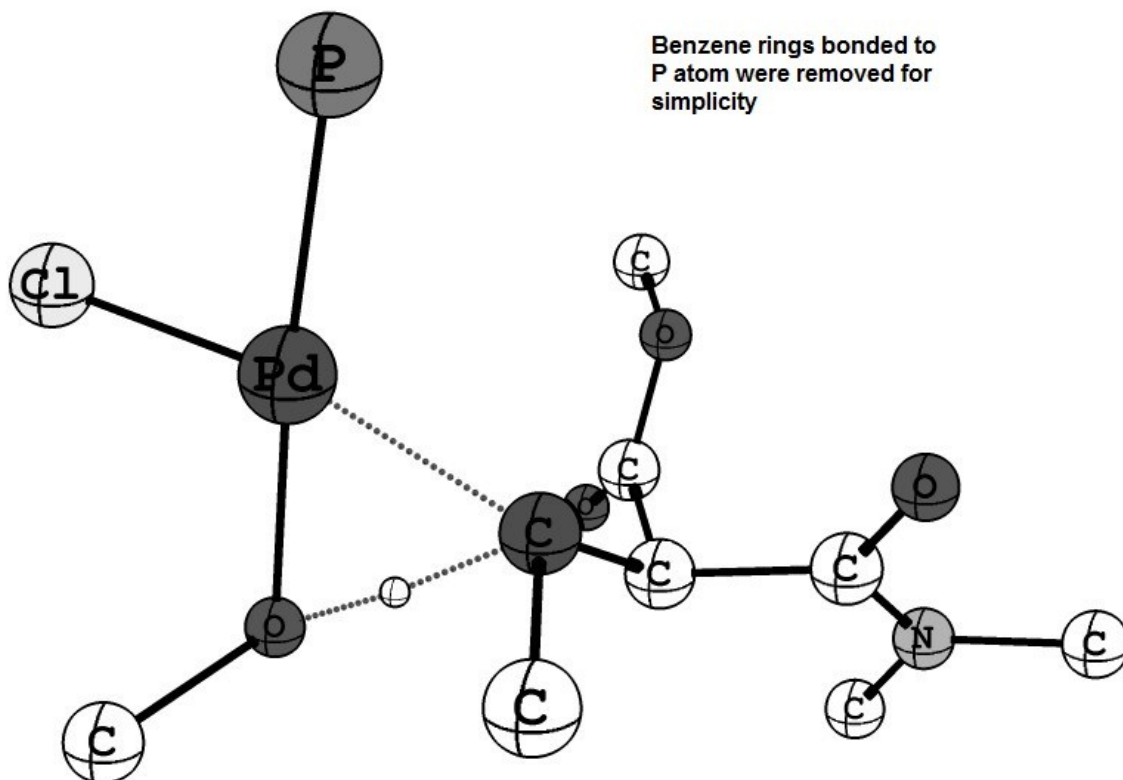

|    |              |              |              |
|----|--------------|--------------|--------------|
| Pd | 0.174059000  | -1.557199000 | 0.037203000  |
| P  | 1.456022000  | 0.336383000  | -0.083748000 |
| Cl | 1.917694000  | -2.655100000 | 1.191775000  |
| C  | -2.681127000 | -0.452721000 | 1.281133000  |
| O  | -2.972152000 | -1.200096000 | 2.187564000  |
| O  | -2.005865000 | 0.689625000  | 1.461101000  |
| C  | -1.601867000 | 0.995426000  | 2.802973000  |
| H  | -0.978528000 | 0.186128000  | 3.203285000  |
| H  | -1.020774000 | 1.921025000  | 2.740299000  |
| H  | -2.484867000 | 1.131286000  | 3.443162000  |
| C  | -3.038024000 | -0.673698000 | -0.181867000 |
| H  | -3.628319000 | -1.597876000 | -0.207181000 |
| C  | -1.775929000 | -0.867938000 | -1.044589000 |
| H  | -1.253851000 | 0.088240000  | -1.086023000 |
| C  | -3.900346000 | 0.511182000  | -0.681961000 |
| O  | -3.408653000 | 1.379669000  | -1.395382000 |
| C  | -6.066449000 | 1.608225000  | -0.758660000 |
| H  | -6.501684000 | 2.162197000  | 0.089259000  |
| H  | -5.480004000 | 2.292200000  | -1.379898000 |
| H  | -6.893394000 | 1.188532000  | -1.356472000 |
| C  | -5.869297000 | -0.478450000 | 0.517747000  |
| H  | -5.163820000 | -1.085758000 | 1.091365000  |

|   |              |              |              |
|---|--------------|--------------|--------------|
| H | -6.542375000 | 0.011860000  | 1.237643000  |
| H | -6.479809000 | -1.141261000 | -0.120665000 |
| N | -5.200070000 | 0.543583000  | -0.274954000 |
| C | -2.072823000 | -1.304005000 | -2.482205000 |
| H | -1.136250000 | -1.399696000 | -3.051618000 |
| H | -2.593208000 | -2.274730000 | -2.521039000 |
| H | -2.703598000 | -0.556032000 | -2.987946000 |
| H | -1.478321000 | -2.085423000 | -0.576098000 |
| C | -0.725276000 | -4.218578000 | -0.861759000 |
| H | 0.199522000  | -4.691761000 | -0.488522000 |
| H | -1.511380000 | -4.992324000 | -0.936802000 |
| H | -0.524237000 | -3.842798000 | -1.882620000 |
| O | -1.157738000 | -3.195244000 | 0.010701000  |
| C | 0.882103000  | 1.594443000  | -1.283748000 |
| C | 1.622656000  | 1.893008000  | -2.439141000 |
| C | -0.342197000 | 2.248563000  | -1.060099000 |
| C | 1.146316000  | 2.837366000  | -3.352080000 |
| H | 2.573483000  | 1.394134000  | -2.627261000 |
| C | -0.812691000 | 3.189196000  | -1.976657000 |
| H | -0.941569000 | 2.018236000  | -0.179112000 |
| C | -0.070232000 | 3.487131000  | -3.123028000 |
| H | 1.731111000  | 3.064777000  | -4.246237000 |
| H | -1.775827000 | 3.669399000  | -1.798241000 |
| H | -0.441665000 | 4.221927000  | -3.841121000 |
| C | 3.157073000  | -0.051084000 | -0.622212000 |
| C | 4.261765000  | 0.642630000  | -0.110748000 |
| C | 3.343431000  | -1.033116000 | -1.607951000 |
| C | 5.545515000  | 0.353740000  | -0.583443000 |
| H | 4.122964000  | 1.405809000  | 0.657000000  |
| C | 4.625277000  | -1.311613000 | -2.083318000 |
| H | 2.481933000  | -1.579530000 | -1.998107000 |
| C | 5.728492000  | -0.620168000 | -1.569220000 |
| H | 6.404884000  | 0.893023000  | -0.178691000 |
| H | 4.765336000  | -2.075254000 | -2.851592000 |
| H | 6.732683000  | -0.843979000 | -1.936527000 |
| C | 1.624800000  | 1.235272000  | 1.501612000  |
| C | 1.801911000  | 0.498185000  | 2.684693000  |
| C | 1.599992000  | 2.638223000  | 1.557041000  |
| C | 1.941852000  | 1.159096000  | 3.905862000  |
| H | 1.826892000  | -0.592011000 | 2.641228000  |
| C | 1.733044000  | 3.293152000  | 2.784531000  |
| H | 1.473514000  | 3.223938000  | 0.646549000  |
| C | 1.900114000  | 2.556144000  | 3.960464000  |
| H | 2.074551000  | 0.578350000  | 4.821405000  |
| H | 1.706520000  | 4.384520000  | 2.818892000  |
| H | 1.999525000  | 3.070602000  | 4.918994000  |



### TSA61-a-t

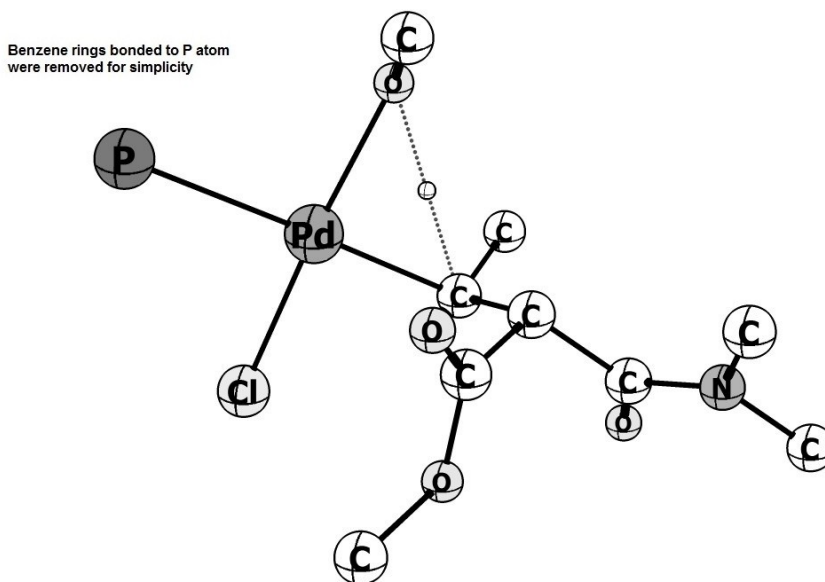

|    |             |              |              |
|----|-------------|--------------|--------------|
| Pd | 0.399667000 | 0.053868000  | -0.880410000 |
| C  | 2.890044000 | -0.450296000 | 0.875483000  |
| O  | 2.363170000 | 0.019408000  | 1.865156000  |
| O  | 3.162419000 | -1.745545000 | 0.732168000  |
| C  | 2.680608000 | -2.632514000 | 1.748233000  |
| H  | 1.582677000 | -2.660650000 | 1.724656000  |
| H  | 3.088009000 | -3.620381000 | 1.505846000  |
| H  | 3.021575000 | -2.307728000 | 2.741090000  |
| C  | 3.314723000 | 0.347658000  | -0.349464000 |
| H  | 3.217039000 | 1.405906000  | -0.076364000 |
| C  | 2.379556000 | 0.029703000  | -1.524580000 |
| H  | 2.564532000 | -1.001451000 | -1.841150000 |
| C  | 4.795178000 | 0.054253000  | -0.696112000 |
| O  | 5.097887000 | -0.622349000 | -1.674848000 |
| C  | 7.138840000 | 0.309446000  | -0.250864000 |
| H  | 7.352302000 | -0.771001000 | -0.239345000 |
| H  | 7.353059000 | 0.680703000  | -1.265124000 |
| H  | 7.802716000 | 0.813043000  | 0.462438000  |
| C  | 5.528144000 | 1.391116000  | 1.301563000  |
| H  | 4.470196000 | 1.425260000  | 1.574713000  |
| H  | 6.076051000 | 0.971289000  | 2.160246000  |
| H  | 5.881626000 | 2.424232000  | 1.141645000  |
| N  | 5.752814000 | 0.573110000  | 0.119382000  |
| C  | 2.551007000 | 0.970652000  | -2.706613000 |
| H  | 1.833251000 | 0.736327000  | -3.508150000 |
| H  | 2.424039000 | 2.037539000  | -2.447137000 |
| H  | 3.567556000 | 0.878522000  | -3.127848000 |

|    |              |              |              |
|----|--------------|--------------|--------------|
| H  | 1.464291730  | 1.148867630  | -1.008750230 |
| C  | 0.720183000  | 2.726203000  | 0.811533000  |
| H  | 1.588428000  | 2.292618000  | 1.326310000  |
| H  | 0.789796000  | 3.822982000  | 0.774119000  |
| H  | -0.191256000 | 2.444601000  | 1.348576000  |
| O  | 0.599727000  | 2.206038000  | -0.521494000 |
| P  | -1.906621000 | 0.030745000  | -0.062982000 |
| Cl | 0.337061000  | -2.275633000 | -1.222574000 |
| C  | -2.516769000 | 1.656570000  | 0.528213000  |
| C  | -2.534774000 | 2.716195000  | -0.396062000 |
| C  | -2.895922000 | 1.897635000  | 1.856311000  |
| C  | -2.929567000 | 3.992813000  | 0.002442000  |
| H  | -2.231541000 | 2.539244000  | -1.430628000 |
| C  | -3.283375000 | 3.181650000  | 2.255292000  |
| H  | -2.885595000 | 1.084263000  | 2.583380000  |
| C  | -3.299893000 | 4.230075000  | 1.332045000  |
| H  | -2.941384000 | 4.808997000  | -0.723712000 |
| H  | -3.574990000 | 3.360087000  | 3.292963000  |
| H  | -3.601078000 | 5.232225000  | 1.645825000  |
| C  | -3.264492000 | -0.528693000 | -1.166885000 |
| C  | -4.570026000 | -0.023291000 | -1.045967000 |
| C  | -2.988830000 | -1.495735000 | -2.148236000 |
| C  | -5.584019000 | -0.481497000 | -1.891094000 |
| H  | -4.796821000 | 0.730976000  | -0.290566000 |
| C  | -4.007259000 | -1.952067000 | -2.989367000 |
| H  | -1.976572000 | -1.895275000 | -2.237939000 |
| C  | -5.305022000 | -1.446181000 | -2.864459000 |
| H  | -6.595919000 | -0.082421000 | -1.788102000 |
| H  | -3.783801000 | -2.704876000 | -3.749188000 |
| H  | -6.098575000 | -1.801582000 | -3.526118000 |
| C  | -2.019284000 | -1.049922000 | 1.412868000  |
| C  | -0.904797000 | -1.094445000 | 2.268292000  |
| C  | -3.152244000 | -1.819019000 | 1.713740000  |
| C  | -0.932511000 | -1.889731000 | 3.415732000  |
| H  | -0.006519000 | -0.518836000 | 2.032710000  |
| C  | -3.172681000 | -2.620498000 | 2.859597000  |
| H  | -4.020088000 | -1.795315000 | 1.052168000  |
| C  | -2.065388000 | -2.655935000 | 3.712568000  |
| H  | -0.060690000 | -1.918920000 | 4.073638000  |
| H  | -4.057623000 | -3.220318000 | 3.085075000  |
| H  | -2.082863000 | -3.284528000 | 4.606058000  |

TSA61-b

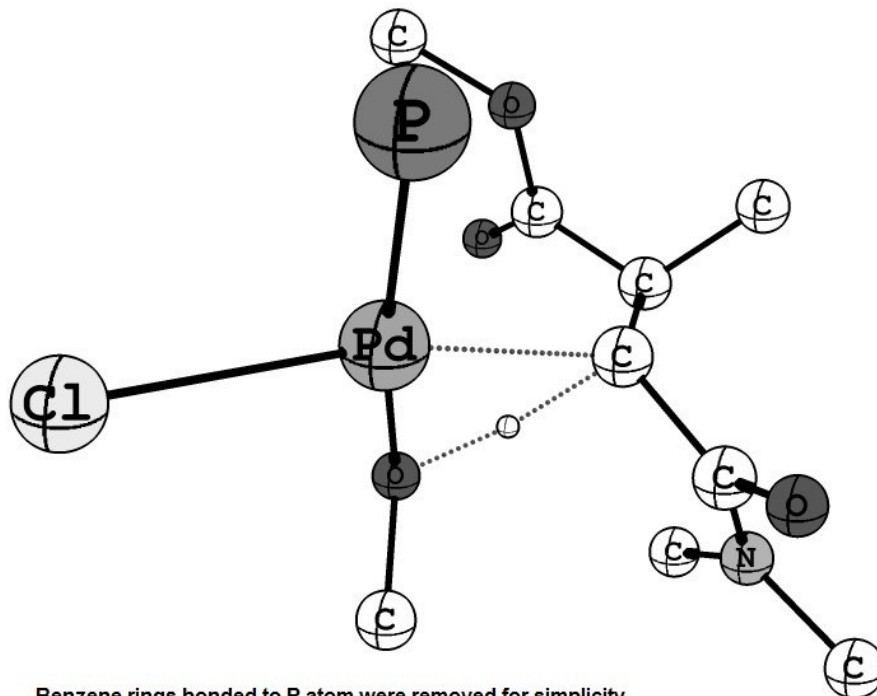

Benzene rings bonded to P atom were removed for simplicity

|    |              |              |              |
|----|--------------|--------------|--------------|
| Pd | -0.364750000 | 0.185548000  | -1.254899000 |
| P  | 1.374226000  | 0.252840000  | 0.202377000  |
| Cl | 1.064558000  | 0.976022000  | -2.942753000 |
| C  | -2.085236000 | -2.709584000 | -0.514248000 |
| O  | -2.552047000 | -3.239655000 | -1.497547000 |
| O  | -0.815052000 | -2.893273000 | -0.119863000 |
| C  | -2.825877000 | -1.730194000 | 0.377156000  |
| H  | -3.853532000 | -1.751891000 | 0.000915000  |
| C  | -2.198268000 | -0.327376000 | 0.179778000  |
| H  | -1.261977000 | -0.349544000 | 0.752008000  |
| C  | -2.878285000 | 0.898352000  | 0.739376000  |
| N  | -4.208894000 | 1.102767000  | 0.500606000  |
| O  | -2.217666000 | 1.718099000  | 1.389648000  |
| H  | -2.330761000 | -0.109089000 | -1.178329000 |
| C  | -2.626488000 | 1.396031000  | -2.797979000 |
| H  | -3.621895000 | 1.314535000  | -3.270772000 |
| H  | -2.714431000 | 2.084431000  | -1.936241000 |
| H  | -1.929797000 | 1.850916000  | -3.521722000 |
| O  | -2.175068000 | 0.113513000  | -2.408370000 |
| C  | -5.015031000 | 0.400020000  | -0.484154000 |
| H  | -4.395082000 | -0.165374000 | -1.185455000 |
| H  | -5.741482000 | -0.282069000 | -0.009974000 |
| H  | -5.580573000 | 1.138430000  | -1.074743000 |
| C  | -4.875390000 | 2.219496000  | 1.151264000  |

|   |              |              |              |
|---|--------------|--------------|--------------|
| H | -5.042554000 | 3.050665000  | 0.442967000  |
| H | -5.854962000 | 1.894330000  | 1.536361000  |
| H | -4.254141000 | 2.581008000  | 1.976874000  |
| C | 0.017169000  | -3.678027000 | -0.977969000 |
| H | 1.001035000  | -3.720665000 | -0.498070000 |
| H | -0.393526000 | -4.689836000 | -1.101698000 |
| H | 0.103239000  | -3.197922000 | -1.963532000 |
| C | -2.823554000 | -2.148228000 | 1.852263000  |
| H | -1.800776000 | -2.171765000 | 2.252210000  |
| H | -3.407769000 | -1.426280000 | 2.443004000  |
| H | -3.275892000 | -3.143379000 | 1.986837000  |
| C | 0.942358000  | -0.372532000 | 1.872755000  |
| C | 0.376625000  | 0.460121000  | 2.850218000  |
| C | 1.112049000  | -1.741039000 | 2.145480000  |
| C | -0.004069000 | -0.069628000 | 4.085255000  |
| H | 0.216640000  | 1.517654000  | 2.650920000  |
| C | 0.732079000  | -2.263821000 | 3.381563000  |
| H | 1.546091000  | -2.401720000 | 1.395710000  |
| C | 0.172640000  | -1.429482000 | 4.354705000  |
| H | -0.442480000 | 0.587435000  | 4.839473000  |
| H | 0.870496000  | -3.328261000 | 3.582599000  |
| H | -0.127295000 | -1.840374000 | 5.321314000  |
| C | 1.853751000  | 2.001881000  | 0.398640000  |
| C | 0.823081000  | 2.936000000  | 0.615575000  |
| C | 3.180230000  | 2.439073000  | 0.281717000  |
| C | 1.132211000  | 4.291124000  | 0.744589000  |
| H | -0.217252000 | 2.604170000  | 0.684437000  |
| C | 3.478232000  | 3.799586000  | 0.404165000  |
| H | 3.982617000  | 1.727439000  | 0.086072000  |
| C | 2.458473000  | 4.725338000  | 0.640070000  |
| H | 0.330845000  | 5.012525000  | 0.919646000  |
| H | 4.513574000  | 4.134838000  | 0.310438000  |
| H | 2.695540000  | 5.787505000  | 0.734728000  |
| C | 2.851631000  | -0.723394000 | -0.229977000 |
| C | 2.915883000  | -1.440980000 | -1.432240000 |
| C | 3.913049000  | -0.808310000 | 0.690012000  |
| C | 4.035942000  | -2.227698000 | -1.716428000 |
| H | 2.094799000  | -1.376890000 | -2.145131000 |
| C | 5.032122000  | -1.587284000 | 0.396280000  |
| H | 3.860538000  | -0.275775000 | 1.641682000  |
| C | 5.094388000  | -2.298958000 | -0.807509000 |
| H | 4.077723000  | -2.787820000 | -2.653045000 |
| H | 5.854705000  | -1.645064000 | 1.112355000  |
| H | 5.968567000  | -2.914101000 | -1.032694000 |

TSA61-b-t

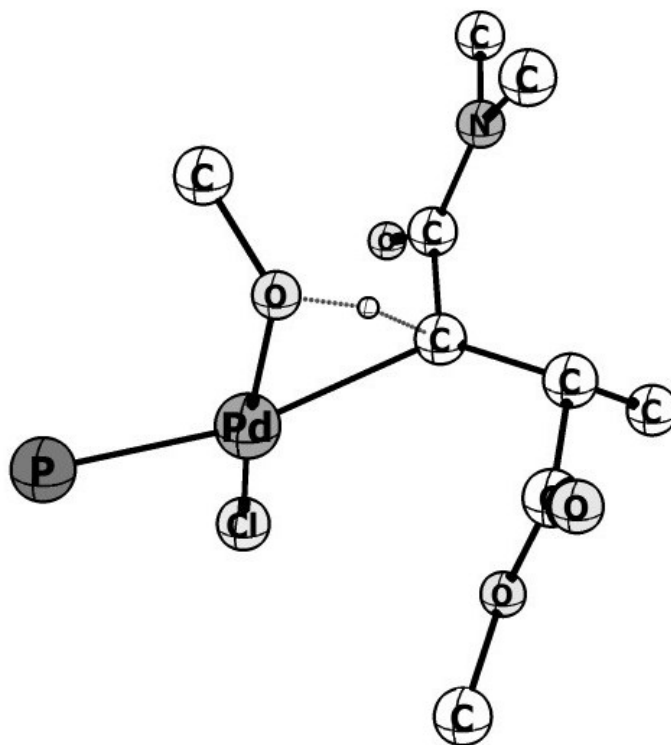

Benzene rings bonded to P atom  
were removed for simplicity

|    |              |              |              |
|----|--------------|--------------|--------------|
| Pd | -0.455301000 | -0.165723000 | 0.308853000  |
| C  | -4.663318000 | -1.504011000 | 0.144240000  |
| O  | -4.953124000 | -2.290874000 | 1.019670000  |
| O  | -5.559448000 | -0.694026000 | -0.433643000 |
| C  | -6.900163000 | -0.744881000 | 0.082191000  |
| H  | -6.905267000 | -0.489939000 | 1.140595000  |
| H  | -7.460690000 | -0.010880000 | -0.488674000 |
| H  | -7.323215000 | -1.738677000 | -0.055463000 |
| C  | -3.253388000 | -1.298989000 | -0.384855000 |
| H  | -2.769660000 | -2.256735000 | -0.216407000 |
| C  | -2.554620000 | -0.276846000 | 0.551594000  |
| H  | -2.595693000 | -0.693232000 | 1.558433000  |
| C  | -3.302729000 | 1.032331000  | 0.675124000  |
| N  | -3.294130000 | 1.952556000  | -0.325093000 |
| C  | -4.097323000 | 3.152212000  | -0.159769000 |
| H  | -4.344396000 | 3.548101000  | -1.144631000 |
| H  | -5.010289000 | 2.914957000  | 0.377308000  |
| H  | -3.554749000 | 3.922679000  | 0.398527000  |
| C  | -2.314945000 | 2.031363000  | -1.390390000 |
| H  | -1.717375000 | 1.128713000  | -1.427006000 |
| H  | -2.813453000 | 2.166915000  | -2.352242000 |

|    |              |              |              |
|----|--------------|--------------|--------------|
| H  | -1.642375000 | 2.876430000  | -1.219687000 |
| C  | -3.221753000 | -1.011287000 | -1.883500000 |
| H  | -3.704773000 | -1.822776000 | -2.430553000 |
| H  | -3.737314000 | -0.087888000 | -2.132853000 |
| H  | -2.190475000 | -0.942065000 | -2.225289000 |
| O  | -3.997229000 | 1.220480000  | 1.684023000  |
| H  | -1.475724400 | -1.254133240 | 0.013482580  |
| C  | -0.411709000 | -3.250437000 | 0.482187000  |
| H  | -0.434099000 | -4.217714000 | -0.018037000 |
| H  | 0.470252000  | -3.171612000 | 1.116182000  |
| H  | -1.302962000 | -3.129627000 | 1.089865000  |
| O  | -0.432970000 | -2.198683000 | -0.506603000 |
| Cl | -0.451006000 | 1.845136000  | 1.503517000  |
| P  | 1.908919000  | 0.021921000  | 0.009477000  |
| C  | 2.404091000  | 1.656183000  | -0.620377000 |
| C  | 3.569122000  | 2.306362000  | -0.216045000 |
| C  | 1.560842000  | 2.279341000  | -1.544665000 |
| C  | 3.891433000  | 3.554416000  | -0.738035000 |
| H  | 4.223219000  | 1.850563000  | 0.512998000  |
| C  | 1.889462000  | 3.519230000  | -2.073089000 |
| H  | 0.640976000  | 1.794403000  | -1.840216000 |
| C  | 3.056702000  | 4.160553000  | -1.669510000 |
| H  | 4.795541000  | 4.052500000  | -0.412981000 |
| H  | 1.229227000  | 3.990114000  | -2.789615000 |
| H  | 3.309401000  | 5.132011000  | -2.073843000 |
| C  | 2.944053000  | -0.314177000 | 1.463915000  |
| C  | 4.297318000  | -0.648735000 | 1.352237000  |
| C  | 2.360231000  | -0.235835000 | 2.729233000  |
| C  | 5.052970000  | -0.893023000 | 2.490180000  |
| H  | 4.758394000  | -0.728311000 | 0.377109000  |
| C  | 3.120491000  | -0.479349000 | 3.867370000  |
| H  | 1.313103000  | 0.019057000  | 2.816355000  |
| C  | 4.465904000  | -0.807484000 | 3.749569000  |
| H  | 6.099079000  | -1.153079000 | 2.394922000  |
| H  | 2.659072000  | -0.417363000 | 4.844226000  |
| H  | 5.056675000  | -1.001242000 | 4.635384000  |
| C  | 2.516545000  | -1.159207000 | -1.248612000 |
| C  | 2.656651000  | -0.797303000 | -2.590114000 |
| C  | 2.722939000  | -2.496862000 | -0.886286000 |
| C  | 2.997705000  | -1.748100000 | -3.544625000 |
| H  | 2.508499000  | 0.229239000  | -2.893513000 |
| C  | 3.059628000  | -3.445407000 | -1.843932000 |
| H  | 2.638589000  | -2.798911000 | 0.148963000  |
| C  | 3.196920000  | -3.073825000 | -3.177015000 |
| H  | 3.109281000  | -1.448436000 | -4.578440000 |
| H  | 3.219382000  | -4.472842000 | -1.544632000 |

|    |             |              |              |
|----|-------------|--------------|--------------|
| H  | 3.460833000 | -3.812092000 | -3.922450000 |
| H  | 5.788323740 | -0.258418060 | -3.735242320 |
| H  | 3.036116040 | -3.559901920 | -3.289635440 |
| H  | 5.351466950 | -2.713826860 | -3.675728160 |
| Cl | 1.381164800 | 0.246638520  | 0.200338570  |

**Table S2.** DFT/B3LYP-D3-PCM/Def2-TZVP computed total electronic energies ( $E_{\text{tot}}$ , au), zero-point energies (ZPE, kcal/mol) and Gibbs free energies ( $G_{\text{tot}}$ , 383.15K, au) in methanol for the alkoxy cycle

| <b>Compound</b>  | <b><math>E_{\text{tot}}</math> (solv+D3)</b> | <b>ZPE</b> | <b><math>G_{\text{tot}}</math> (solv+D3)</b> |
|------------------|----------------------------------------------|------------|----------------------------------------------|
| <b>1A</b>        | -2776.8763486                                | 370.62906  | -2776.354210                                 |
| <b>2A</b>        | -1853.5375541                                | 203.46793  | -1853.267876                                 |
| <b>2A-t</b>      | -1853.5355261                                | 204.17552  | -1853.271251                                 |
| <b>TSA23</b>     | -1853.52885023                               | 203.28141  | -1853.258824                                 |
| <b>3A</b>        | -1853.53351992                               | 204.54622  | -1853.263963                                 |
| <b>3A-G</b>      | -1853.4674365                                | 200.19211  | -1853.209557                                 |
| <b>4A</b>        | -2218.98384753                               | 309.15048  | -2218.554959                                 |
| <b>TSA45-a</b>   | -2218.95445949                               | 308.38407  | -2218.526430                                 |
| <b>TSA45-b</b>   | -2218.95550859                               | 308.83705  | -2218.525748                                 |
| <b>5A-a</b>      | -2219.0002333                                | 310.6055   | -2218.568967                                 |
| <b>5A-b</b>      | -2219.0054911                                | 311.25264  | -2218.571065                                 |
| <b>6A-a</b>      | -2334.7962143                                | 344.64670  | -2334.313922                                 |
| <b>6A-a-t</b>    | -2334.7700657                                | 343.88858  | -2334.295846                                 |
| <b>6A-b</b>      | -2334.7902529                                | 344.59919  | -2334.308641                                 |
| <b>6A-b-t</b>    | -2334.776824                                 | 345.85206  | -2334.298934                                 |
| <b>TSA61-a</b>   | -2334.741365                                 | 342.01752  | -2334.273642                                 |
| <b>TSA61-a-t</b> | -2334.6917645                                | 339.87993  | -2334.216854                                 |
| <b>TSA61-b</b>   | -2334.74258926                               | 342.02708  | -2334.264149                                 |
| <b>TSA61-b-t</b> | -2334.68705305                               | 339.88452  | -2334.208456                                 |
